# Supplementary material
Source: publisher figshare collection journal article supplement (https://acs.figshare.com/ndownloader/files/20168405)
Supplement: Supplementary file 1 [file 20168405]

## Sheet: Node information
Table S1: Nodes in hGPCRnet and basic information about them. Including UniProtKB Accession number, protein category and classification, expression in Cell types, associated Diseases.
UniProt Accession	Gene Name	Category	Classification	Protein Name	Number of Cell Types	MCODE cluster	Degree	Betweenness Centrality	Top Hubs and Bottlenecks	Diseases	Cell Types	Protein Function	Protein Family	All UniProt Accessions	UniProt ID
P07550	ADRB2	G-Protein Coupled Receptor	Family 1	Beta-2 adrenergic receptor	-	-	86	0.026231	Bottleneck	Asthma|Autistic Disorder|Bipolar Disorder|Hyperlipidemia|Obesity|Myocardial Ischemia|	-	Beta-adrenergic receptors mediate the catecholamine- induced activation of adenylate cyclase through the action of G proteins. The beta-2-adrenergic receptor binds epinephrine with an approximately 30-fold greater affinity than it does norepinephrine.	Belongs to the G-protein coupled receptor 1 family. Adrenergic receptor subfamily. ADRB2 sub-subfamily.	P07550|B0LPE4|B2R7X2|O14823|O14824|O14825|O14826|Q4JG18|Q53GA6|Q6GMT4|Q6P4D8|Q8NEQ9|Q96EC3|Q9UCZ0|Q9UCZ1|Q9UCZ2|Q9UCZ3|Q9UH95|Q9UHA1|Q9UMZ5|	ADRB2_HUMAN
P61073	CXCR4	G-Protein Coupled Receptor	Family 1	C-X-C chemokine receptor type 4	-	6	41	0.00616006	-	Rheumatoid Arthritis|IgG Deficiency|WHIM syndrome|Recurrent upper respiratory tract infection|Juvenile arthritis|Warts|Abnormality of bone marrow cell morphology|Abnormality of female external genitalia|Abnormality of female internal genitalia|	-	Receptor for the C-X-C chemokine CXCL12/SDF-1 that transduces a signal by increasing intracellular calcium ion levels and enhancing MAPK1/MAPK3 activation. Acts as a receptor for extracellular ubiquitin; leading to enhanced intracellular calcium ions and reduced cellular cAMP levels. Involved in hematopoiesis and in cardiac ventricular septum formation. Also plays an essential role in vasculariza…	Belongs to the G-protein coupled receptor 1 family.	P61073|B2R5N0|O60835|P30991|P56438|Q53S69|Q9BXA0|Q9UKN2|	CXCR4_HUMAN
P34969	HTR7	G-Protein Coupled Receptor	Family 1	5-hydroxytryptamine receptor 7	26	4	39	0.00186717	-	Alcoholic Intoxication, Chronic|Mental Depression|Depressive disorder|Memory Disorders|Schizophrenia|	adrenal gland glandular cells|appendix lymphoid tissue|bronchus respiratory epithelial cells|cerebral cortex glial cells|cerebral cortex neuronal cells|cerebral cortex neuronal projections|colon glandular cells|epididymis glandular cells|hypothalamus neuronal cells|hypothalamus neuronal projections|kidney cells in glomeruli|lung macrophages|lymph node germinal center cells|pancreas islets of Lang…	This is one of the several different receptors for 5- hydroxytryptamine (serotonin), a biogenic hormone that functions as a neurotransmitter, a hormone, and a mitogen. The activity of this receptor is mediated by G proteins that stimulate adenylate cyclase.	Belongs to the G-protein coupled receptor 1 family.	P34969|B5BUP6|P78336|P78372|P78516|Q5VX01|Q5VX02|Q5VX03|	5HT7R_HUMAN
P14416	DRD2	G-Protein Coupled Receptor	Family 1	D(2) dopamine receptor	4	7	35	0.00531994	-	Agoraphobia|Alcoholic Intoxication, Chronic|Anxiety|Bipolar Disorder|Cannabis Dependence|Catalepsy|Cocaine Abuse|Delirium|Mental Depression|Depressive disorder|Dyskinetic syndrome|Dyskinesia, Drug-Induced|Heroin Dependence|Hyperprolactinemia|Single major depressive episode|Marijuana Abuse|Memory Disorders|Obsessive-Compulsive Disorder|Parkinson Disease|Schizophrenia|Substance Withdrawal Syndrome|…	caudate glial cells|cerebral cortex endothelial cells|cerebral cortex neuropil|hippocampus glial cells|	Dopamine receptor whose activity is mediated by G proteins which inhibit adenylyl cyclase.	Belongs to the G-protein coupled receptor 1 family.	P14416|Q9NZR3|Q9UPA9|	DRD2_HUMAN
P35372	OPRM1	G-Protein Coupled Receptor	Family 1	Mu-type opioid receptor	3	7	34	0.00269923	-	Alcoholic Intoxication|Alcoholic Intoxication, Chronic|Mental Depression|Depressive disorder|Dyskinetic syndrome|Epilepsy|Hepatic Encephalopathy|Hepatitis C|Heroin Dependence|Morphine Dependence|Psychoses, Substance-Induced|Schizophrenia|Alcohol abuse|Depression, Postpartum|Dysphoric mood|Idiopathic generalized epilepsy|Nonorganic psychosis|Cocaine Dependence|SCHIZOPHRENIA 12|	testis elongated or late spermatids|testis round or early spermatids|testis sertoli cells|	Receptor for endogenous opioids such as beta-endorphin and endomorphin. Receptor for natural and synthetic opioids including morphine, heroin, DAMGO, fentanyl, etorphine, buprenorphin and methadone (PubMed:7905839, PubMed:7957926, PubMed:7891175, PubMed:12589820, PubMed:9689128). Agonist binding to the receptor induces coupling to an inactive GDP-bound heterotrimeric G-protein complex and subsequ…	Belongs to the G-protein coupled receptor 1 family.	P35372|B0FXJ1|B2R9S7|B8Q1L7|B8Q1L8|B8Q1L9|E7EWZ3|G8XRH6|G8XRH8|Q12930|Q4VWM1|Q4VWM2|Q4VWM3|Q4VWM4|Q4VWM6|Q4VWX6|Q5TDA1|Q6UPP1|Q6UQ80|Q7Z2D8|Q86V80|Q8IWW3|Q8IWW4|Q9UCZ4|Q9UN57|	OPRM_HUMAN
Q92633	LPAR1	G-Protein Coupled Receptor	Family 1	Lysophosphatidic acid receptor 1	-	3	33	0.00655487	-	Leukemia, Myelocytic, Acute|Schizophrenia|	-	Receptor for lysophosphatidic acid (LPA) (PubMed:9070858, PubMed:19306925, PubMed:25025571, PubMed:26091040). Plays a role in the reorganization of the actin cytoskeleton, cell migration, differentiation and proliferation, and thereby contributes to the responses to tissue damage and infectious agents. Activates downstream signaling cascades via the G(i)/G(o), G(12)/G(13), and G(q) families of he…	Belongs to the G-protein coupled receptor 1 family.	Q92633|B4DK36|O00656|O00722|P78351|	LPAR1_HUMAN
P30556	AGTR1	G-Protein Coupled Receptor	Family 1	Type-1 angiotensin II receptor	2	15	32	0.00620104	-	Diabetic Retinopathy|Patent ductus arteriosus|Heart failure|Essential Hypertension|Aortic Aneurysm, Abdominal|Congenital hypoplasia of lung|Allanson Pantzar McLeod syndrome|Potter's facies|Carcinoma, Pancreatic Ductal|	cerebral cortex endothelial cells|soft tissue adipocytes|	Receptor for angiotensin II. Mediates its action by association with G proteins that activate a phosphatidylinositol- calcium second messenger system.	Belongs to the G-protein coupled receptor 1 family.	P30556|Q13725|Q8TBK4|	AGTR1_HUMAN
Q9BXB1	LGR4	G-Protein Coupled Receptor	Family 1	Leucine-rich repeat-containing G-protein coupled receptor 4	64	-	28	0.0009412	-	Schizophrenia|	adrenal gland glandular cells|appendix glandular cells|appendix lymphoid tissue|bone marrow hematopoietic cells|breast adipocytes|breast glandular cells|breast myoepithelial cells|bronchus respiratory epithelial cells|caudate glial cells|caudate neuronal cells|cerebellum Purkinje cells|cerebellum cells in molecular layer|cerebral cortex endothelial cells|cerebral cortex glial cells|cerebral corte…	Receptor for R-spondins that potentiates the canonical Wnt signaling pathway and is involved in the formation of various organs. Upon binding to R-spondins (RSPO1, RSPO2, RSPO3 or RSPO4), associates with phosphorylated LRP6 and frizzled receptors that are activated by extracellular Wnt receptors, triggering the canonical Wnt signaling pathway to increase expression of target genes. In contrast to…	Belongs to the G-protein coupled receptor 1 family.	Q9BXB1|A6NCH3|G5E9B3|Q8N537|Q9NYD1|	LGR4_HUMAN
P48039	MTNR1A	G-Protein Coupled Receptor	Family 1	Melatonin receptor type 1A	-	-	27	0.00187494	-	Schizophrenia|Autism Spectrum Disorders|	-	High affinity receptor for melatonin. Likely to mediate the reproductive and circadian actions of melatonin. The activity of this receptor is mediated by pertussis toxin sensitive G proteins that inhibit adenylate cyclase activity.	Belongs to the G-protein coupled receptor 1 family.	P48039|A0AVC5|B0M0L2|	MTR1A_HUMAN
P20309	CHRM3	G-Protein Coupled Receptor	Family 1	Muscarinic acetylcholine receptor M3	45	9	25	0.00109992	-	Anus, Imperforate|Bipolar Disorder|Congenital clubfoot|Cryptorchidism|Patent ductus arteriosus|Hip Dislocation, Congenital|Hydronephrosis|Liver Cirrhosis|Prune Belly Syndrome|Kidney Failure|Unipolar Depression|Vesico-Ureteral Reflux|Xerostomia|Congenital pectus carinatum|Congenital posterior urethral valves|Recurrent urinary tract infection|Urethral obstruction sequence|Dilatation of ureter|Major…	adrenal gland glandular cells|breast myoepithelial cells|caudate glial cells|caudate neuronal cells|cerebral cortex glial cells|cerebral cortex neuronal cells|colon endothelial cells|colon peripheral nerve/ganglion|duodenum glandular cells|endometrium glandular cells|esophagus squamous epithelial cells|fallopian tube glandular cells|gallbladder glandular cells|hippocampus neuronal cells|kidney ce…	The muscarinic acetylcholine receptor mediates various cellular responses, including inhibition of adenylate cyclase, breakdown of phosphoinositides and modulation of potassium channels through the action of G proteins. Primary transducing effect is Pi turnover.	Belongs to the G-protein coupled receptor 1 family. Muscarinic acetylcholine receptor subfamily. CHRM3 sub-subfamily.	P20309|Q0VAJ8|Q4QRI3|Q5VXY2|Q9HB60|	ACM3_HUMAN
P25116	F2R	G-Protein Coupled Receptor	Family 1	Proteinase-activated receptor 1	19	6	24	0.00581575	-	Fatty Liver|Hepatitis|Liver Cirrhosis|Liver Cirrhosis, Experimental|	bone marrow hematopoietic cells|cerebral cortex neuronal cells|colon endothelial cells|colon peripheral nerve/ganglion|endometrium cells in endometrial stroma|epididymis glandular cells|kidney cells in glomeruli|lymph node germinal center cells|nasopharynx respiratory epithelial cells|placenta decidual cells|seminal vesicle glandular cells|skin epidermal cells|skin fibroblasts|skin keratinocytes|…	High affinity receptor for activated thrombin coupled to G proteins that stimulate phosphoinositide hydrolysis. May play a role in platelets activation and in vascular development.	Belongs to the G-protein coupled receptor 1 family.	P25116|Q53XV0|Q96RF7|Q9BUN4|	PAR1_HUMAN
O15354	GPR37	G-Protein Coupled Receptor	Family 1	Prosaposin receptor GPR37	10	-	24	0.00222405	-	Malignant mesothelioma|	cerebellum cells in granular layer|cerebral cortex endothelial cells|cerebral cortex neuropil|esophagus squamous epithelial cells|liver hepatocytes|placenta decidual cells|prostate glandular cells|smooth muscle smooth muscle cells|testis Leydig cells|thyroid gland glandular cells|	Receptor for the neuroprotective and glioprotective factor prosaposin. Ligand binding induces endocytosis, followed by an ERK phosphorylation cascade.	Belongs to the G-protein coupled receptor 1 family.	O15354|A4D0Y6|O00348|O14768|Q8TD39|	GPR37_HUMAN
P16473	TSHR	G-Protein Coupled Receptor	Family 1	Thyrotropin receptor	1	-	24	0.00118888	-	Congenital Hypothyroidism|Graves Disease|Hyperthyroidism|Hypothyroidism|Lymphatic Metastasis|Macroglossia|Mental Retardation|Severe mental retardation (I.Q. 20-34)|Thyroid Neoplasm|Thyrotoxicosis|Thyroid Hypoplasia|Speech Delay|Xerosis|Toxic diffuse goiter|Global developmental delay|Thyroid Agenesis|Hypersomnia|Mental deficiency|Autoimmune thyroiditis|Hyperthyroidism, Nonautoimmune|Hyperthyroidis…	thyroid gland glandular cells|	Receptor for the thyroid-stimulating hormone (TSH) or thyrotropin (PubMed:11847099, PubMed:12045258). Also acts as a receptor for the heterodimeric glycoprotein hormone (GPHA2:GPHB5) or thyrostimulin (PubMed:12045258). The activity of this receptor is mediated by G proteins which activate adenylate cyclase (PubMed:11847099). Plays a central role in controlling thyroid cell metabolism (By similari…	Belongs to the G-protein coupled receptor 1 family. FSH/LSH/TSH subfamily.	P16473|A0PJU7|F5GYU5|G3V2A9|Q16503|Q8TB90|Q96GT6|Q9P1V4|Q9ULA3|Q9UPH3|	TSHR_HUMAN
P29274	ADORA2A	G-Protein Coupled Receptor	Family 1	Adenosine receptor A2a	8	7	23	0.00274338	-	Rheumatoid Arthritis|Sleep Initiation and Maintenance Disorders|Liver Cirrhosis, Experimental|Panic Disorder|Psychoses, Substance-Induced|Schizophrenia|Substance Withdrawal Syndrome|	bone marrow hematopoietic cells|caudate neuronal cells|caudate neuronal projections|caudate synapses|lymph node non-germinal center cells|thymus cortical cells|thymus medullary cells|tonsil non-germinal center cells|	Receptor for adenosine. The activity of this receptor is mediated by G proteins which activate adenylyl cyclase.	Belongs to the G-protein coupled receptor 1 family.	P29274|B2R7E0|	AA2AR_HUMAN
P49286	MTNR1B	G-Protein Coupled Receptor	Family 1	Melatonin receptor type 1B	-	9	23	0.0030335	-	Diabetes Mellitus, Non-Insulin-Dependent|Polycystic Ovary Syndrome|Schizophrenia|Autism Spectrum Disorders|	-	High affinity receptor for melatonin. Likely to mediate the reproductive and circadian actions of melatonin. The activity of this receptor is mediated by pertussis toxin sensitive G proteins that inhibit adenylate cyclase activity.	Belongs to the G-protein coupled receptor 1 family.	P49286|	MTR1B_HUMAN
P21453	S1PR1	G-Protein Coupled Receptor	Family 1	Sphingosine 1-phosphate receptor 1	61	3	22	0.00234723	-	Bipolar Disorder|Liver Cirrhosis, Experimental|	adrenal gland glandular cells|appendix glandular cells|appendix lymphoid tissue|bone marrow hematopoietic cells|breast glandular cells|breast myoepithelial cells|bronchus respiratory epithelial cells|cerebellum cells in granular layer|cerebral cortex endothelial cells|cerebral cortex glial cells|cerebral cortex neuropil|cervix, uterine glandular cells|colon endothelial cells|colon glandular cells…	G-protein coupled receptor for the bioactive lysosphingolipid sphingosine 1-phosphate (S1P) that seems to be coupled to the G(i) subclass of heteromeric G proteins. Signaling leads to the activation of RAC1, SRC, PTK2/FAK1 and MAP kinases. Plays an important role in cell migration, probably via its role in the reorganization of the actin cytoskeleton and the formation of lamellipodia in response …	Belongs to the G-protein coupled receptor 1 family.	P21453|D3DT66|Q9BYY4|Q9NYN8|	S1PR1_HUMAN
Q99500	S1PR3	G-Protein Coupled Receptor	Family 1	Sphingosine 1-phosphate receptor 3	-	3	20	0.00059838	-	-	-	Receptor for the lysosphingolipid sphingosine 1- phosphate (S1P). S1P is a bioactive lysophospholipid that elicits diverse physiological effect on most types of cells and tissues. When expressed in rat HTC4 hepatoma cells, is capable of mediating S1P-induced cell proliferation and suppression of apoptosis.	Belongs to the G-protein coupled receptor 1 family.	Q99500|Q5SQD8|Q7Z5I2|	S1PR3_HUMAN
Q9UBY5	LPAR3	G-Protein Coupled Receptor	Family 1	Lysophosphatidic acid receptor 3	-	3	20	0.00045444	-	-	-	Receptor for lysophosphatidic acid (LPA), a mediator of diverse cellular activities. May play a role in the development of ovarian cancer. Seems to be coupled to the G(i)/G(o) and G(q) families of heteromeric G proteins.	Belongs to the G-protein coupled receptor 1 family.	Q9UBY5|A0AVA3|	LPAR3_HUMAN
P51681	CCR5	G-Protein Coupled Receptor	Family 1	C-C chemokine receptor type 5	-	6	20	0.00209767	-	Dermatitis, Atopic|Hepatitis C|Nephritis|Schizophrenia|West Nile Fever|Acute kidney injury|DIABETES MELLITUS, INSULIN-DEPENDENT, 22 (disorder)|	-	Receptor for a number of inflammatory CC-chemokines including CCL3/MIP-1-alpha, CCL4/MIP-1-beta and RANTES and subsequently transduces a signal by increasing the intracellular calcium ion level. May play a role in the control of granulocytic lineage proliferation or differentiation.	Belongs to the G-protein coupled receptor 1 family.	P51681|O14692|O14693|O14695|O14696|O14697|O14698|O14699|O14700|O14701|O14702|O14703|O14704|O14705|O14706|O14707|O14708|O15538|Q9UPA4|	CCR5_HUMAN
P43115	PTGER3	G-Protein Coupled Receptor	Family 1	Prostaglandin E2 receptor EP3 subtype	4	7	20	0.00177121	-	Pemphigoid, Benign Mucous Membrane|Polycystic Ovary Syndrome|Schizophrenia|Stevens-Johnson Syndrome|	cervix, uterine glandular cells|endometrium glandular cells|kidney cells in tubules|smooth muscle smooth muscle cells|	Receptor for prostaglandin E2 (PGE2) (PubMed:8307176, PubMed:7883006, PubMed:8117308, PubMed:8135729, PubMed:7981210). The activity of this receptor can couple to both the inhibition of adenylate cyclase mediated by G(i) proteins, and to an elevation of intracellular calcium (PubMed:7883006, PubMed:8117308, PubMed:8135729, PubMed:7981210). Required for normal development of fever in response to p…	Belongs to the G-protein coupled receptor 1 family.	P43115|B0AZN4|B1AK19|B5BUP5|O00326|Q12943|Q12944|Q12945|Q147X8|Q16546|Q5CZ59|Q5CZ61|Q5CZ62|Q5CZ63|Q5CZ64|	PE2R3_HUMAN
O95136	S1PR2	G-Protein Coupled Receptor	Family 1	Sphingosine 1-phosphate receptor 2	3	3	19	0.0008593	-	Diabetes Mellitus, Experimental|Sensorineural Hearing Loss (disorder)|DEAFNESS, AUTOSOMAL RECESSIVE 68|	duodenum glandular cells|kidney cells in tubules|small intestine glandular cells|	Receptor for the lysosphingolipid sphingosine 1- phosphate (S1P). S1P is a bioactive lysophospholipid that elicits diverse physiological effect on most types of cells and tissues. When expressed in rat HTC4 hepatoma cells, is capable of mediating S1P-induced cell proliferation and suppression of apoptosis.	Belongs to the G-protein coupled receptor 1 family.	O95136|Q86UN8|	S1PR2_HUMAN
Q9HBW0	LPAR2	G-Protein Coupled Receptor	Family 1	Lysophosphatidic acid receptor 2	60	3	19	0.00059496	-	-	adrenal gland glandular cells|appendix glandular cells|appendix lymphoid tissue|bone marrow hematopoietic cells|breast adipocytes|breast glandular cells|breast myoepithelial cells|bronchus respiratory epithelial cells|caudate glial cells|caudate neuronal cells|cerebellum Purkinje cells|cerebellum cells in molecular layer|cerebral cortex neuronal cells|cerebral cortex neuropil|cervix, uterine glan…	Receptor for lysophosphatidic acid (LPA), a mediator of diverse cellular activities. Seems to be coupled to the G(i)/G(o), G(12)/G(13), and G(q) families of heteromeric G proteins. Plays a key role in phospholipase C-beta (PLC-beta) signaling pathway. Stimulates phospholipase C (PLC) activity in a manner that is independent of RALA activation.	Belongs to the G-protein coupled receptor 1 family.	Q9HBW0|O00543|O43431|	LPAR2_HUMAN
P25025	CXCR2	G-Protein Coupled Receptor	Family 1	C-X-C chemokine receptor type 2	5	6	19	0.00223335	-	Ulcerative Colitis|Mastitis|Pneumonia|Sepsis|Infarction, Middle Cerebral Artery|Juvenile arthritis|	bone marrow hematopoietic cells|lymph node non-germinal center cells|spleen cells in red pulp|tonsil germinal center cells|tonsil non-germinal center cells|	Receptor for interleukin-8 which is a powerful neutrophil chemotactic factor. Binding of IL-8 to the receptor causes activation of neutrophils. This response is mediated via a G-protein that activates a phosphatidylinositol-calcium second messenger system. Binds to IL-8 with high affinity. Also binds with high affinity to CXCL3, GRO/MGSA and NAP-2.	Belongs to the G-protein coupled receptor 1 family.	P25025|Q8IUZ1|Q9P2T6|Q9P2T7|	CXCR2_HUMAN
P30411	BDKRB2	G-Protein Coupled Receptor	Family 1	B2 bradykinin receptor	17	16	19	0.00122336	-	Rheumatoid Arthritis|Bipolar Disorder|Epilepsy, Temporal Lobe|Extravasation of Diagnostic and Therapeutic Materials|Hyperemia|Unipolar Depression|Major Depressive Disorder|Acute kidney injury|	adrenal gland glandular cells|bronchus respiratory epithelial cells|caudate neuronal cells|cerebral cortex neuronal cells|cerebral cortex neuropil|cervix, uterine squamous epithelial cells|esophagus squamous epithelial cells|hippocampus neuronal cells|lung pneumocytes|nasopharynx respiratory epithelial cells|placenta decidual cells|salivary gland glandular cells|skin epidermal cells|stomach gland…	Receptor for bradykinin. It is associated with G proteins that activate a phosphatidylinositol-calcium second messenger system.	Belongs to the G-protein coupled receptor 1 family. Bradykinin receptor subfamily. BDKRB2 sub-subfamily.	P30411|	BKRB2_HUMAN
P41143	OPRD1	G-Protein Coupled Receptor	Family 1	Delta-type opioid receptor	8	-	19	0.00209698	-	Alcoholic Intoxication, Chronic|Epilepsy|Substance Withdrawal Syndrome|Nonorganic psychosis|Cocaine Dependence|	caudate glial cells|cerebellum cells in granular layer|cerebral cortex glial cells|hippocampus glial cells|kidney cells in tubules|pancreas islets of Langerhans|spleen cells in red pulp|stomach glandular cells|	G-protein coupled receptor that functions as receptor for endogenous enkephalins and for a subset of other opioids. Ligand binding causes a conformation change that triggers signaling via guanine nucleotide-binding proteins (G proteins) and modulates the activity of down-stream effectors, such as adenylate cyclase. Signaling leads to the inhibition of adenylate cyclase activity. Inhibits neurotra…	Belongs to the G-protein coupled receptor 1 family.	P41143|B5B0B8|	OPRD_HUMAN
P30542	ADORA1	G-Protein Coupled Receptor	Family 1	Adenosine receptor A1	-	6	18	0.00089803	-	Catalepsy|Transient Ischemic Attack|Myocardial Infarction|Prenatal Exposure Delayed Effects|Schizophrenia|Subarachnoid Hemorrhage|Substance Withdrawal Syndrome|Infarction, Middle Cerebral Artery|	-	Receptor for adenosine. The activity of this receptor is mediated by G proteins which inhibit adenylyl cyclase.	Belongs to the G-protein coupled receptor 1 family.	P30542|A6NFY5|A6NGP4|A8K1L3|B3KXQ4|D2CGD0|Q6FHK3|Q8TAM8|	AA1R_HUMAN
P21731	TBXA2R	G-Protein Coupled Receptor	Family 1	Thromboxane A2 receptor	-	13	18	0.00111794	-	Pulmonary Embolism|Rhinitis|Asthma, Aspirin-Induced|BLEEDING DISORDER, PLATELET-TYPE, 13, SUSCEPTIBILITY TO|Chemical and Drug Induced Liver Injury|	-	Receptor for thromboxane A2 (TXA2), a potent stimulator of platelet aggregation. The activity of this receptor is mediated by a G-protein that activates a phosphatidylinositol-calcium second messenger system. In the kidney, the binding of TXA2 to glomerular TP receptors causes intense vasoconstriction. Activates phospholipase C. Isoform 1 activates adenylyl cyclase. Isoform 2 inhibits adenylyl cy…	Belongs to the G-protein coupled receptor 1 family.	P21731|O75228|Q6DK52|Q9UCY1|Q9UCY2|	TA2R_HUMAN
P55085	F2RL1	G-Protein Coupled Receptor	Family 1	Proteinase-activated receptor 2	52	6	17	0.00125477	-	Gastroenteritis|melanoma|Myocardial Ischemia|	adrenal gland glandular cells|appendix glandular cells|appendix lymphoid tissue|bone marrow hematopoietic cells|bronchus respiratory epithelial cells|caudate glial cells|caudate neuronal cells|cerebellum Purkinje cells|cerebellum cells in granular layer|cerebral cortex glial cells|cerebral cortex neuronal cells|cervix, uterine squamous epithelial cells|colon endothelial cells|colon glandular cell…	Receptor for trypsin and trypsin-like enzymes coupled to G proteins (PubMed:28445455). Its function is mediated through the activation of several signaling pathways including phospholipase C (PLC), intracellular calcium, mitogen-activated protein kinase (MAPK), I-kappaB kinase/NF-kappaB and Rho (PubMed:28445455). Can also be transactivated by cleaved F2R/PAR1. Involved in modulation of inflammato…	Belongs to the G-protein coupled receptor 1 family.	P55085|Q13317|Q13346|Q53XJ8|	PAR2_HUMAN
P23945	FSHR	G-Protein Coupled Receptor	Family 1	Follicle-stimulating hormone receptor	-	7	17	0.00139128	-	Gonadal Dysgenesis|Gonadal Dysgenesis, Mixed|Premature Menopause|Osteopenia|Osteoporosis|Polycystic Ovary Syndrome|Ovarian Hyperstimulation Syndrome|Primary physiologic amenorrhea|Streak ovary|Capillary Leak Syndrome|Pure Gonadal Dysgenesis, 46, XX|Pure gonadal dysgenesis|Generalized osteopenia|Gonadal Dysgenesis, 46,XX|Genitourinary dysplasia|Enlarged polycystic ovaries|Osteoporosis of vertebrae|	-	G protein-coupled receptor for follitropin, the follicle-stimulating hormone (PubMed:11847099, PubMed:24058690, PubMed:24692546). Through cAMP production activates the downstream PI3K-AKT and ERK1/ERK2 signaling pathways (PubMed:24058690).	Belongs to the G-protein coupled receptor 1 family. FSH/LSH/TSH subfamily.	P23945|A0A0A0MSC5|A8K947|G5CBS7|G5E967|J3KQ00|Q05AH0|Q16225|Q4QRJ3|Q4ZFZ2|Q53RW2|	FSHR_HUMAN
P08913	ADRA2A	G-Protein Coupled Receptor	Family 1	Alpha-2A adrenergic receptor	-	-	17	0.00063243	-	Alcoholic Intoxication, Chronic|Mental Depression|Depressive disorder|Epilepsy|Panic Disorder|Schizophrenia|	-	Alpha-2 adrenergic receptors mediate the catecholamine- induced inhibition of adenylate cyclase through the action of G proteins. The rank order of potency for agonists of this receptor is oxymetazoline > clonidine > epinephrine > norepinephrine > phenylephrine > dopamine > p-synephrine > p-tyramine > serotonin = p-octopamine. For antagonists, the rank order is yohimbine > phentolamine = mianseri…	Belongs to the G-protein coupled receptor 1 family. Adrenergic receptor subfamily. ADRA2A sub-subfamily.	P08913|B0LPF6|Q2I8G2|Q2XN99|Q86TH8|Q9BZK1|	ADA2A_HUMAN
P21554	CNR1	G-Protein Coupled Receptor	Family 1	Cannabinoid receptor 1	-	-	17	0.00069949	-	Alcoholic Intoxication, Chronic|Bipolar Disorder|Catalepsy|Mental Depression|Depressive disorder|Endometriosis|Epilepsy, Temporal Lobe|Huntington Disease|Liver Cirrhosis|Liver Cirrhosis, Experimental|Marijuana Abuse|Multiple Sclerosis|Obesity|Pancreatic Neoplasm|Pancreatitis|Rhabdomyosarcoma|Schizophrenia|Status Epilepticus|Substance Withdrawal Syndrome|Unipolar Depression|Cocaine Dependence|Atte…	-	G-protein coupled receptor for endogenous cannabinoids (eCBs), including N-arachidonoylethanolamide (also called anandamide or AEA) and 2-arachidonoylglycerol (2-AG), as well as phytocannabinoids, such as delta(9)-tetrahydrocannabinol (THC) (PubMed:15620723, PubMed:27768894, PubMed:27851727). Mediates many cannabinoid-induced effects, acting, among others, on food intake, memory loss, gastrointes…	Belongs to the G-protein coupled receptor 1 family.	P21554|B2R9T4|E1P512|Q13949|Q495Z0|Q4PLI4|Q4VBM6|Q5JVL5|Q5UB37|Q9UNN0|	CNR1_HUMAN
P24530	EDNRB	G-Protein Coupled Receptor	Family 1	Endothelin receptor type B	23	-	17	0.00066225	-	Albinism|Diabetes Mellitus, Non-Insulin-Dependent|Sensorineural Hearing Loss (disorder)|Hirschsprung Disease|Intestinal Obstruction|Leukodystrophy|Nephrosis|Nystagmus|Subarachnoid Hemorrhage|Polyneuropathy|Congenital deafness|Synophrys|Global developmental delay|ABCD syndrome|HIRSCHSPRUNG DISEASE, SUSCEPTIBILITY TO, 2|WAARDENBURG SYNDROME, TYPE 4A|Abnormality of vision|	appendix glandular cells|appendix lymphoid tissue|bronchus respiratory epithelial cells|cervix, uterine glandular cells|colon endothelial cells|endometrium glandular cells|epididymis glandular cells|fallopian tube glandular cells|kidney cells in tubules|lung macrophages|lymph node non-germinal center cells|nasopharynx respiratory epithelial cells|placenta trophoblastic cells|rectum glandular cell…	Non-specific receptor for endothelin 1, 2, and 3. Mediates its action by association with G proteins that activate a phosphatidylinositol-calcium second messenger system.	Belongs to the G-protein coupled receptor 1 family. Endothelin receptor subfamily. EDNRB sub-subfamily.	P24530|A2A2Z8|A8K3T4|O15343|Q59GB1|Q5W0G9|Q8NHM6|Q8NHM7|Q8NHM8|Q8NHM9|Q9UD23|Q9UQK3|	EDNRB_HUMAN
P41145	OPRK1	G-Protein Coupled Receptor	Family 1	Kappa-type opioid receptor	7	6	16	0.00057348	-	Alcoholic Intoxication, Chronic|Bipolar Disorder|Mental Depression|Depressive disorder|Schizophrenia|Substance Withdrawal Syndrome|Anhedonia|Cocaine Dependence|	caudate glial cells|cerebellum cells in molecular layer|cerebral cortex glial cells|cerebral cortex neuropil|hippocampus glial cells|hippocampus neuronal cells|prostate glandular cells|	G-protein coupled opioid receptor that functions as receptor for endogenous alpha-neoendorphins and dynorphins, but has low affinity for beta-endorphins. Also functions as receptor for various synthetic opioids and for the psychoactive diterpene salvinorin A. Ligand binding causes a conformation change that triggers signaling via guanine nucleotide-binding proteins (G proteins) and modulates the …	Belongs to the G-protein coupled receptor 1 family.	P41145|E5RHC9|Q499G4|	OPRK_HUMAN
Q92847	GHSR	G-Protein Coupled Receptor	Family 1	Growth hormone secretagogue receptor type 1	-	13	16	0.00386018	-	Alcoholic Intoxication, Chronic|Hypoglycemia|Ketosis|Short Stature, Idiopathic, Autosomal|	-	Receptor for ghrelin, coupled to G-alpha-11 proteins. Stimulates growth hormone secretion. Binds also other growth hormone releasing peptides (GHRP) (e.g. Met-enkephalin and GHRP-6) as well as non-peptide, low molecular weight secretagogues (e.g. L-692,429, MK-0677, adenosine).	Belongs to the G-protein coupled receptor 1 family.	Q92847|Q14D12|Q6ISR8|Q92848|Q96RJ7|	GHSR_HUMAN
P21917	DRD4	G-Protein Coupled Receptor	Family 1	D(4) dopamine receptor	-	-	16	0.00114575	-	Alcoholic Intoxication|Alcoholic Intoxication, Chronic|Separation Anxiety Disorder|Bipolar Disorder|Mental Depression|Depressive disorder|Marijuana Abuse|Schizophrenia|Tic disorder|Unipolar Depression|Seasonal Affective Disorder|Alcohol abuse|Dysphoric mood|Attention deficit hyperactivity disorder|Major Depressive Disorder|PARKINSON DISEASE, LATE-ONSET|Cannabis use|	-	Dopamine receptor responsible for neuronal signaling in the mesolimbic system of the brain, an area of the brain that regulates emotion and complex behavior. Activated by dopamine, but also by epinephrine and norepinephrine, and by numerous synthetic agonists and drugs (PubMed:9003072, PubMed:16423344, PubMed:27659709, PubMed:29051383). Agonist binding triggers signaling via G proteins that inhib…	Belongs to the G-protein coupled receptor 1 family.	P21917|B0M0J7|Q7Z7Q5|Q8NGM5|	DRD4_HUMAN
P22888	LHCGR	G-Protein Coupled Receptor	Family 1	Lutropin-choriogonadotropic hormone receptor	-	-	16	0.00082713	-	Leydig Cell Tumor|Precocious Puberty|Leydig cell agenesis|Familial Testotoxicosis|Acne|Leydig Cell Hypoplasia|Primary hypogonadism|Testotoxicosis|	-	Receptor for lutropin-choriogonadotropic hormone (PubMed:11847099). The activity of this receptor is mediated by G proteins which activate adenylate cyclase (PubMed:11847099).	Belongs to the G-protein coupled receptor 1 family. FSH/LSH/TSH subfamily.	P22888|Q14751|Q15996|Q9UEW9|	LSHR_HUMAN
P25105	PTAFR	G-Protein Coupled Receptor	Family 1	Platelet-activating factor receptor	46	-	16	0.00107645	-	Liver Cirrhosis, Experimental|Polycystic Ovary Syndrome|	adrenal gland glandular cells|appendix glandular cells|breast glandular cells|breast myoepithelial cells|bronchus respiratory epithelial cells|caudate glial cells|cerebellum Purkinje cells|cerebral cortex endothelial cells|cerebral cortex glial cells|cerebral cortex neuropil|cervix, uterine squamous epithelial cells|colon glandular cells|colon peripheral nerve/ganglion|duodenum glandular cells|en…	Receptor for platelet activating factor, a chemotactic phospholipid mediator that possesses potent inflammatory, smooth- muscle contractile and hypotensive activity. Seems to mediate its action via a G protein that activates a phosphatidylinositol- calcium second messenger system.	Belongs to the G-protein coupled receptor 1 family.	P25105|A3KMC8|A8K2H5|	PTAFR_HUMAN
P28335	HTR2C	G-Protein Coupled Receptor	Family 1	5-hydroxytryptamine receptor 2C	-	-	16	0.00171347	-	Alcoholic Intoxication, Chronic|Bipolar Disorder|Cocaine Abuse|Mental Depression|Depressive disorder|Obesity|Schizophrenia|Substance Withdrawal Syndrome|Unipolar Depression|Seasonal Affective Disorder|Metabolic Syndrome X|Major Depressive Disorder|	-	G-protein coupled receptor for 5-hydroxytryptamine (serotonin). Also functions as a receptor for various drugs and psychoactive substances, including ergot alkaloid derivatives, 1- 2,5,-dimethoxy-4-iodophenyl-2-aminopropane (DOI) and lysergic acid diethylamide (LSD). Ligand binding causes a conformation change that triggers signaling via guanine nucleotide-binding proteins (G proteins) and modula…	Belongs to the G-protein coupled receptor 1 family.	P28335|B1AMW4|Q5VUF8|Q9NP28|	5HT2C_HUMAN
P32239	CCKBR	G-Protein Coupled Receptor	Family 1	Gastrin/cholecystokinin type B receptor	-	-	16	0.00130908	-	Obsessive-Compulsive Disorder|Panic Disorder|Substance Withdrawal Syndrome|	-	Receptor for gastrin and cholecystokinin. The CCK-B receptors occur throughout the central nervous system where they modulate anxiety, analgesia, arousal, and neuroleptic activity. This receptor mediates its action by association with G proteins that activate a phosphatidylinositol-calcium second messenger system.	Belongs to the G-protein coupled receptor 1 family.	P32239|A8K7P9|O75824|Q16144|Q92492|Q96LC6|Q9NYK7|Q9UBV1|	GASR_HUMAN
P08908	HTR1A	G-Protein Coupled Receptor	Family 1	5-hydroxytryptamine receptor 1A	36	-	15	0.00253664	-	Alcoholic Intoxication, Chronic|Bipolar Disorder|Depression, Bipolar|Mental Depression|Depressive disorder|Single major depressive episode|Memory Disorders|Psychoses, Substance-Induced|Schizophrenia|Unipolar Depression|Alcohol abuse|Anhedonia|Depression, Postpartum|Severe depression|Intermittent migraine headaches|Major Depressive Disorder|	adrenal gland glandular cells|appendix glandular cells|breast adipocytes|bronchus respiratory epithelial cells|caudate glial cells|cerebellum cells in granular layer|cerebellum cells in molecular layer|cerebral cortex endothelial cells|cerebral cortex neuronal cells|cerebral cortex neuropil|colon endothelial cells|colon glandular cells|colon peripheral nerve/ganglion|duodenum glandular cells|esop…	G-protein coupled receptor for 5-hydroxytryptamine (serotonin). Also functions as a receptor for various drugs and psychoactive substances. Ligand binding causes a conformation change that triggers signaling via guanine nucleotide-binding proteins (G proteins) and modulates the activity of down-stream effectors, such as adenylate cyclase. Beta-arrestin family members inhibit signaling via G prote…	Belongs to the G-protein coupled receptor 1 family. 5- hydroxytryptamine receptor subfamily. HTR1A sub-subfamily.	P08908|Q6LAE7|	5HT1A_HUMAN
P25024	CXCR1	G-Protein Coupled Receptor	Family 1	C-X-C chemokine receptor type 1	33	-	15	0.00063625	-	Ulcerative Colitis|	adrenal gland glandular cells|bone marrow hematopoietic cells|breast glandular cells|breast myoepithelial cells|bronchus respiratory epithelial cells|cerebellum Purkinje cells|cerebral cortex neuronal cells|cervix, uterine glandular cells|cervix, uterine squamous epithelial cells|colon glandular cells|duodenum glandular cells|endometrium glandular cells|esophagus squamous epithelial cells|gallbla…	Receptor to interleukin-8, which is a powerful neutrophils chemotactic factor. Binding of IL-8 to the receptor causes activation of neutrophils. This response is mediated via a G-protein that activate a phosphatidylinositol-calcium second messenger system. This receptor binds to IL-8 with a high affinity and to MGSA (GRO) with a low affinity.	Belongs to the G-protein coupled receptor 1 family.	P25024|B2R6Q3|Q2YEF8|Q2YEG4|Q2YEG5|Q2YEG7|Q2YEG8|Q53R18|Q6IN95|Q8N6T6|Q9P2T8|Q9P2T9|Q9P2U0|Q9P2U1|Q9P2U2|	CXCR1_HUMAN
P30559	OXTR	G-Protein Coupled Receptor	Family 1	Oxytocin receptor	-	-	15	0.00093096	-	Autistic Disorder|Non-Small Cell Lung Carcinoma|Mental Depression|Depressive disorder|Schizophrenia|Unipolar Depression|Major Depressive Disorder|Autism Spectrum Disorders|Chromosome 3, monosomy 3p25|	-	Receptor for oxytocin. The activity of this receptor is mediated by G proteins which activate a phosphatidylinositol- calcium second messenger system.	Belongs to the G-protein coupled receptor 1 family. Vasopressin/oxytocin receptor subfamily.	P30559|Q15071|	OXYR_HUMAN
P41231	P2RY2	G-Protein Coupled Receptor	Family 1	P2Y purinoceptor 2	24	6	14	0.0011334	-	-	appendix lymphoid tissue|bone marrow hematopoietic cells|breast myoepithelial cells|bronchus respiratory epithelial cells|cervix, uterine glandular cells|cervix, uterine squamous epithelial cells|endometrium glandular cells|epididymis glandular cells|esophagus squamous epithelial cells|fallopian tube glandular cells|lung macrophages|lung pneumocytes|nasopharynx respiratory epithelial cells|oral m…	Receptor for ATP and UTP coupled to G-proteins that activate a phosphatidylinositol-calcium second messenger system. The affinity range is UTP = ATP > ATP-gamma-S >> 2-methylthio-ATP = ADP.	Belongs to the G-protein coupled receptor 1 family.	P41231|B2R9W3|Q96EM8|	P2RY2_HUMAN
Q96RI0	F2RL3	G-Protein Coupled Receptor	Family 1	Proteinase-activated receptor 4	-	6	14	0.00043989	-	Cholestasis|Peliosis Hepatis|Chemical and Drug Induced Liver Injury|	-	Receptor for activated thrombin or trypsin coupled to G proteins that stimulate phosphoinositide hydrolysis. May play a role in platelets activation.	Belongs to the G-protein coupled receptor 1 family.	Q96RI0|O76067|Q6DK42|	PAR4_HUMAN
P08172	CHRM2	G-Protein Coupled Receptor	Family 1	Muscarinic acetylcholine receptor M2	69	7	14	0.00072963	-	Alcoholic Intoxication, Chronic|Bipolar Disorder|Neurogenic Urinary Bladder|Mental Depression|Depressive disorder|Diabetes Mellitus, Experimental|Diabetes Mellitus, Insulin-Dependent|Epilepsy|Schizophrenia|	adrenal gland glandular cells|appendix glandular cells|appendix lymphoid tissue|bone marrow hematopoietic cells|breast glandular cells|breast myoepithelial cells|bronchus respiratory epithelial cells|caudate glial cells|caudate neuronal cells|cerebellum Purkinje cells|cerebellum cells in granular layer|cerebellum cells in molecular layer|cerebral cortex endothelial cells|cerebral cortex glial cel…	The muscarinic acetylcholine receptor mediates various cellular responses, including inhibition of adenylate cyclase, breakdown of phosphoinositides and modulation of potassium channels through the action of G proteins. Primary transducing effect is adenylate cyclase inhibition. Signaling promotes phospholipase C activity, leading to the release of inositol trisphosphate (IP3); this then triggers…	Belongs to the G-protein coupled receptor 1 family. Muscarinic acetylcholine receptor subfamily. CHRM2 sub-subfamily.	P08172|Q4VBK6|Q9P1X9|	ACM2_HUMAN
Q9NPC1	LTB4R2	G-Protein Coupled Receptor	Family 1	Leukotriene B4 receptor 2	-	7	14	0.00217622	-	-	-	Low-affinity receptor for leukotrienes including leukotriene B4. Mediates chemotaxis of granulocytes and macrophages. The response is mediated via G-proteins that activate a phosphatidylinositol-calcium second messenger system. The rank order of affinities for the leukotrienes is LTB4 > 12-epi-LTB4 > LTB5 > LTB3.	Belongs to the G-protein coupled receptor 1 family.	Q9NPC1|Q5KU28|Q9NPE5|	LT4R2_HUMAN
P25101	EDNRA	G-Protein Coupled Receptor	Family 1	Endothelin-1 receptor	66	-	14	0.0010039	-	Cleft Palate|Diabetes Mellitus, Non-Insulin-Dependent|Conductive hearing loss|Micrognathism|Low set ears|Mandibular hypoplasia|Hypoplasia of the maxilla|Erectile dysfunction|Mandibulofacial Dysostosis|Stenosis of external auditory canal|Sleep Apnea, Obstructive|ovarian neoplasm|Prominent ear|Hypoplastic mandible condyle|Uranostaphyloschisis|Capuchin ears|MANDIBULOFACIAL DYSOSTOSIS WITH ALOPECIA|	adrenal gland glandular cells|appendix glandular cells|appendix lymphoid tissue|bone marrow hematopoietic cells|breast adipocytes|breast glandular cells|bronchus respiratory epithelial cells|caudate glial cells|caudate neuronal cells|cerebellum Purkinje cells|cerebellum cells in granular layer|cerebral cortex endothelial cells|cerebral cortex glial cells|cerebral cortex neuronal cells|cerebral co…	Receptor for endothelin-1. Mediates its action by association with G proteins that activate a phosphatidylinositol- calcium second messenger system. The rank order of binding affinities for ET-A is: ET1 > ET2 >> ET3.	Belongs to the G-protein coupled receptor 1 family. Endothelin receptor subfamily. EDNRA sub-subfamily.	P25101|B2R723|B4E2V6|B7Z9G6|D3DP03|E7ER36|O43441|Q16432|Q16433|Q8TBH2|	EDNRA_HUMAN
P25103	TACR1	G-Protein Coupled Receptor	Family 1	Substance-P receptor	10	-	14	0.00070707	-	Alcoholic Intoxication, Chronic|Bipolar Disorder|Mental Depression|Depressive disorder|Schizophrenia|Substance Withdrawal Syndrome|Neurogenic Inflammation|Attention deficit hyperactivity disorder|	bronchus respiratory epithelial cells|cervix, uterine squamous epithelial cells|esophagus squamous epithelial cells|oral mucosa squamous epithelial cells|prostate glandular cells|skin epidermal cells|skin keratinocytes|stomach glandular cells|tonsil squamous epithelial cells|vagina squamous epithelial cells|	This is a receptor for the tachykinin neuropeptide substance P. It is probably associated with G proteins that activate a phosphatidylinositol-calcium second messenger system. The rank order of affinity of this receptor to tachykinins is: substance P > substance K > neuromedin-K.	Belongs to the G-protein coupled receptor 1 family.	P25103|A8K150|	NK1R_HUMAN
P30518	AVPR2	G-Protein Coupled Receptor	Family 1	Vasopressin V2 receptor	25	-	14	0.00057686	-	Congenital adrenal hyperplasia|Anorexia|Diabetes Insipidus|Epilepsy|Heart failure|Mental Retardation|Nephrogenic Diabetes Insipidus|Mental deficiency|Hypertonic dehydration|Nephrogenic Diabetes Insipidus, Type I|Nephrogenic Syndrome of Inappropriate Antidiuresis|Pediatric failure to thrive|Sodium concentration in urine above normal|	bone marrow hematopoietic cells|breast adipocytes|breast glandular cells|breast myoepithelial cells|colon endothelial cells|colon glandular cells|endometrium cells in endometrial stroma|endometrium glandular cells|epididymis glandular cells|esophagus squamous epithelial cells|fallopian tube glandular cells|heart muscle myocytes|kidney cells in tubules|lung pneumocytes|lymph node non-germinal cent…	Receptor for arginine vasopressin. The activity of this receptor is mediated by G proteins which activate adenylate cyclase. Involved in renal water reabsorption.	Belongs to the G-protein coupled receptor 1 family. Vasopressin/oxytocin receptor subfamily.	P30518|C5HF20|O43192|Q3MJD3|Q9UCV9|	V2R_HUMAN
P32246	CCR1	G-Protein Coupled Receptor	Family 1	C-C chemokine receptor type 1	-	-	14	0.00061863	-	Arthritis|Behcet Syndrome|Contact Dermatitis|Meningitis|Pneumonia|Aphthous Stomatitis|Vasculitis|Oral Ulcer|Acne|Intermittent migraine headaches|Multiple, subcutaneous nodules|Liver carcinoma|Recurrent aphthous ulcer|	-	Receptor for a C-C type chemokine. Binds to MIP-1-alpha, MIP-1-delta, RANTES, and MCP-3 and, less efficiently, to MIP-1- beta or MCP-1 and subsequently transduces a signal by increasing the intracellular calcium ions level. Responsible for affecting stem cell proliferation.	Belongs to the G-protein coupled receptor 1 family.	P32246|Q86VA9|	CCR1_HUMAN
O00254	F2RL2	G-Protein Coupled Receptor	Family 1	Proteinase-activated receptor 3	-	6	13	0.00011526	-	-	-	Receptor for activated thrombin coupled to G proteins that stimulate phosphoinositide hydrolysis.	Belongs to the G-protein coupled receptor 1 family.	O00254|B2R754|B4DQ13|Q52M68|Q7Z3W3|	PAR3_HUMAN
Q9H244	P2RY12	G-Protein Coupled Receptor	Family 1	P2Y purinoceptor 12	9	6	13	0.00070531	-	Lupus Erythematosus, Systemic|Myocardial Infarction|Bleeding Disorder Due To P2RY12 Defect|	bone marrow hematopoietic cells|caudate glial cells|cerebellum cells in molecular layer|cerebral cortex glial cells|fallopian tube glandular cells|hippocampus glial cells|lymph node non-germinal center cells|spleen cells in red pulp|tonsil non-germinal center cells|	Receptor for ADP and ATP coupled to G-proteins that inhibit the adenylyl cyclase second messenger system. Not activated by UDP and UTP. Required for normal platelet aggregation and blood coagulation.	Belongs to the G-protein coupled receptor 1 family.	Q9H244|D3DNJ5|Q546J7|	P2Y12_HUMAN
O15552	FFAR2	G-Protein Coupled Receptor	Family 1	Free fatty acid receptor 2	16	7	13	0.00080612	-	-	bone marrow hematopoietic cells|caudate glial cells|caudate neuronal cells|endometrium glandular cells|lung macrophages|lymph node germinal center cells|lymph node non-germinal center cells|oral mucosa squamous epithelial cells|ovary follicle cells|pancreas islets of Langerhans|prostate glandular cells|skin Langerhans|skin epidermal cells|skin keratinocytes|skin melanocytes|spleen cells in red pu…	G protein-coupled receptor that is activated by a major product of dietary fiber digestion, the short chain fatty acids (SCFAs), and that plays a role in the regulation of whole-body energy homeostasis and in intestinal immunity. In omnivorous mammals, the short chain fatty acids acetate, propionate and butyrate are produced primarily by the gut microbiome that metabolizes dietary fibers. SCFAs s…	Belongs to the G-protein coupled receptor 1 family.	O15552|B0M0J9|Q4VAZ3|Q4VAZ5|Q4VBL5|	FFAR2_HUMAN
P21730	C5AR1	G-Protein Coupled Receptor	Family 1	C5a anaphylatoxin chemotactic receptor 1	24	7	13	0.00087721	-	Liver Cirrhosis, Experimental|	adrenal gland glandular cells|appendix lymphoid tissue|bone marrow hematopoietic cells|caudate neuronal cells|cerebral cortex neuropil|colon endothelial cells|colon peripheral nerve/ganglion|endometrium glandular cells|fallopian tube glandular cells|gallbladder glandular cells|hippocampus neuronal cells|kidney cells in tubules|lung macrophages|lymph node non-germinal center cells|placenta decidua…	Receptor for the chemotactic and inflammatory peptide anaphylatoxin C5a (PubMed:1847994, PubMed:8182049, PubMed:7622471, PubMed:9553099, PubMed:10636859, PubMed:15153520, PubMed:29300009). The ligand interacts with at least two sites on the receptor: a high-affinity site on the extracellular N- terminus, and a second site in the transmembrane region which activates downstream signaling events (Pu…	Belongs to the G-protein coupled receptor 1 family.	P21730|	C5AR1_HUMAN
P47900	P2RY1	G-Protein Coupled Receptor	Family 1	P2Y purinoceptor 1	51	7	13	0.00045807	-	-	adrenal gland glandular cells|appendix glandular cells|breast glandular cells|breast myoepithelial cells|bronchus respiratory epithelial cells|caudate neuronal cells|cerebellum Purkinje cells|cerebral cortex endothelial cells|cerebral cortex neuronal cells|cerebral cortex neuropil|colon endothelial cells|colon glandular cells|duodenum glandular cells|endometrium glandular cells|epididymis glandul…	Receptor for extracellular adenine nucleotides such as ADP (PubMed:9442040, PubMed:9038354, PubMed:25822790). In platelets, binding to ADP leads to mobilization of intracellular calcium ions via activation of phospholipase C, a change in platelet shape, and ultimately platelet aggregation (PubMed:9442040).	Belongs to the G-protein coupled receptor 1 family.	P47900|	P2RY1_HUMAN
P21728	DRD1	G-Protein Coupled Receptor	Family 1	D(1A) dopamine receptor	-	-	13	0.00090262	-	Alcoholic Intoxication, Chronic|Autistic Disorder|Bipolar Disorder|Catalepsy|Mental Depression|Depressive disorder|Dyskinesia, Drug-Induced|Parkinson Disease|Psychoses, Drug|Schizophrenia|Recurrent depression|	-	Dopamine receptor whose activity is mediated by G proteins which activate adenylyl cyclase.	Belongs to the G-protein coupled receptor 1 family.	P21728|B2RA44|Q4QRJ0|	DRD1_HUMAN
P41146	OPRL1	G-Protein Coupled Receptor	Family 1	Nociceptin receptor	-	-	13	0.0006357	-	Alcoholic Intoxication, Chronic|Morphine Dependence|Substance Withdrawal Syndrome|	-	G-protein coupled opioid receptor that functions as receptor for the endogenous neuropeptide nociceptin. Ligand binding causes a conformation change that triggers signaling via guanine nucleotide-binding proteins (G proteins) and modulates the activity of down-stream effectors. Signaling via G proteins mediates inhibition of adenylate cyclase activity and calcium channel activity. Arrestins modul…	Belongs to the G-protein coupled receptor 1 family.	P41146|Q8TD34|Q8WYH9|Q9H4K4|	OPRX_HUMAN
P41597	CCR2	G-Protein Coupled Receptor	Family 1	C-C chemokine receptor type 2	31	6	12	0.00063412	-	Pneumonia|Pulmonary Fibrosis|Status Epilepticus|Dermatitis, Allergic Contact|Chemical and Drug Induced Liver Injury|	bone marrow hematopoietic cells|breast glandular cells|bronchus respiratory epithelial cells|caudate neuronal cells|cerebellum cells in granular layer|cerebral cortex endothelial cells|cerebral cortex neuronal cells|cervix, uterine squamous epithelial cells|endometrium cells in endometrial stroma|esophagus squamous epithelial cells|gallbladder glandular cells|heart muscle myocytes|hippocampus gli…	Receptor for the CCL2, CCL7 and CCL13 chemokines (PubMed:23408426). Receptor for the beta-defensin DEFB106A/DEFB106B (PubMed:23938203). Transduces a signal by increasing intracellular calcium ion levels (By similarity). Upon CCL2 ligation, mediates chemotaxis and migration induction through the activation of the PI3K cascade, the small G protein Rac and lamellipodium protrusion (Probable).	Belongs to the G-protein coupled receptor 1 family.	P41597|A0AVQ3|B2RMT0|O95950|Q4VBL2|	CCR2_HUMAN
O60883	GPR37L1	G-Protein Coupled Receptor	Family 1	Prosaposin receptor GPR37L1	5	7	12	0.00729136	-	-	caudate glial cells|cerebellum cells in molecular layer|cerebral cortex neuronal cells|cerebral cortex neuropil|hippocampus glial cells|	Receptor for the neuroprotective and glioprotective factor prosaposin. Ligand binding induces endocytosis, followed by an ERK phosphorylation cascade.	Belongs to the G-protein coupled receptor 1 family.	O60883|B2R7M9|Q5SXP7|Q86VP7|	ETBR2_HUMAN
O43603	GALR2	G-Protein Coupled Receptor	Family 1	Galanin receptor type 2	57	11	12	0.00034319	-	Alcoholic Intoxication, Chronic|Depressive disorder|Unipolar Depression|Alcohol abuse|Major Depressive Disorder|	adrenal gland glandular cells|appendix glandular cells|appendix lymphoid tissue|bone marrow hematopoietic cells|breast glandular cells|breast myoepithelial cells|bronchus respiratory epithelial cells|caudate neuronal cells|cerebellum Purkinje cells|cerebral cortex endothelial cells|cerebral cortex neuronal cells|cervix, uterine glandular cells|cervix, uterine squamous epithelial cells|colon endot…	Receptor for the hormone galanin and GALP. Receptor for the hormone spexin-1 (PubMed:24517231). The activity of this receptor is mediated by G proteins that activate the phospholipase C/protein kinase C pathway (via G(q)) and that inhibit adenylyl cyclase (via G(i)).	Belongs to the G-protein coupled receptor 1 family.	O43603|A5JUU4|Q32MN8|	GALR2_HUMAN
P08173	CHRM4	G-Protein Coupled Receptor	Family 1	Muscarinic acetylcholine receptor M4	9	-	12	0.00057101	-	Catatonia|Schizophrenia|	caudate neuronal cells|cerebellum Purkinje cells|cerebellum cells in granular layer|cerebellum cells in molecular layer|cerebral cortex endothelial cells|cerebral cortex glial cells|cerebral cortex neuronal cells|cerebral cortex neuropil|hippocampus neuronal cells|	The muscarinic acetylcholine receptor mediates various cellular responses, including inhibition of adenylate cyclase, breakdown of phosphoinositides and modulation of potassium channels through the action of G proteins. Primary transducing effect is inhibition of adenylate cyclase.	Belongs to the G-protein coupled receptor 1 family. Muscarinic acetylcholine receptor subfamily. CHRM4 sub-subfamily.	P08173|B2RPP4|Q0VD60|Q4VBK7|	ACM4_HUMAN
P35346	SSTR5	G-Protein Coupled Receptor	Family 1	Somatostatin receptor type 5	-	-	12	0.00025654	-	Bipolar Disorder|Status Epilepticus|Unipolar Depression|Growth Hormone-Secreting Pituitary Adenoma|Major Depressive Disorder|	-	Receptor for somatostatin 28 and to a lesser extent for somatostatin-14. The activity of this receptor is mediated by G proteins which inhibit adenylyl cyclase. Increases cell growth inhibition activity of SSTR2 following heterodimerization.	Belongs to the G-protein coupled receptor 1 family.	P35346|P34988|Q541E0|Q9UJI5|	SSR5_HUMAN
P35348	ADRA1A	G-Protein Coupled Receptor	Family 1	Alpha-1A adrenergic receptor	5	-	12	0.00172156	-	Bipolar Disorder|Cannabis Dependence|Cocaine Abuse|Diabetes Mellitus, Experimental|Liver Cirrhosis|Schizophrenia|Unipolar Depression|Cocaine Dependence|Major Depressive Disorder|cocaine use|	caudate glial cells|cerebral cortex glial cells|cerebral cortex neuropil|heart muscle myocytes|hippocampus glial cells|	This alpha-adrenergic receptor mediates its action by association with G proteins that activate a phosphatidylinositol- calcium second messenger system. Its effect is mediated by G(q) and G(11) proteins. Nuclear ADRA1A-ADRA1B heterooligomers regulate phenylephrine(PE)-stimulated ERK signaling in cardiac myocytes.	Belongs to the G-protein coupled receptor 1 family. Adrenergic receptor subfamily. ADRA1A sub-subfamily.	P35348|A8K0I3|B0ZBD1|B0ZBD2|B0ZBD4|B0ZBD5|B0ZBD6|B0ZBD8|B0ZBD9|O60451|Q13675|Q13729|Q4VBM7|Q6RUJ4|Q6RUJ5|Q6RUJ7|Q6RUJ8|Q6RUJ9|Q96RE8|Q9UD63|Q9UD67|	ADA1A_HUMAN
P35414	APLNR	G-Protein Coupled Receptor	Family 1	Apelin receptor	42	-	12	7.898e-05	-	-	adrenal gland glandular cells|bone marrow hematopoietic cells|caudate glial cells|caudate neuronal cells|cerebral cortex glial cells|cerebral cortex neuronal cells|cerebral cortex neuropil|cervix, uterine squamous epithelial cells|colon endothelial cells|colon peripheral nerve/ganglion|duodenum glandular cells|epididymis glandular cells|esophagus squamous epithelial cells|fallopian tube glandular…	Receptor for apelin receptor early endogenous ligand (APELA) and apelin (APLN) hormones coupled to G proteins that inhibit adenylate cyclase activity (PubMed:11090199, PubMed:25639753, PubMed:28137936). Plays a key role in early development such as gastrulation, blood vessels formation and heart morphogenesis by acting as a receptor for APELA hormone (By similarity). May promote angioblast migrat…	Belongs to the G-protein coupled receptor 1 family.	P35414|	APJ_HUMAN
P35462	DRD3	G-Protein Coupled Receptor	Family 1	D(3) dopamine receptor	-	-	12	0.00046197	-	Alcoholic Intoxication, Chronic|Autistic Disorder|Bipolar Disorder|Cocaine Abuse|Delirium|Mental Depression|Depressive disorder|Dyskinesia, Drug-Induced|Schizophrenia|Gilles de la Tourette syndrome|Unipolar Depression|Alcohol abuse|Recurrent depression|Cocaine Dependence|Major Depressive Disorder|TREMOR, HEREDITARY ESSENTIAL, 1|	-	Dopamine receptor whose activity is mediated by G proteins which inhibit adenylyl cyclase. Promotes cell proliferation.	Belongs to the G-protein coupled receptor 1 family.	P35462|A1A4V5|Q4VBM8|	DRD3_HUMAN
Q16581	C3AR1	G-Protein Coupled Receptor	Family 1	C3a anaphylatoxin chemotactic receptor	26	-	12	0.00125691	-	-	appendix glandular cells|appendix lymphoid tissue|bone marrow hematopoietic cells|breast glandular cells|breast myoepithelial cells|bronchus respiratory epithelial cells|colon endothelial cells|colon glandular cells|colon peripheral nerve/ganglion|duodenum glandular cells|endometrium cells in endometrial stroma|heart muscle myocytes|lung macrophages|lung pneumocytes|lymph node non-germinal center…	Receptor for the chemotactic and inflammatory peptide anaphylatoxin C3a. This receptor stimulates chemotaxis, granule enzyme release and superoxide anion production.	Belongs to the G-protein coupled receptor 1 family.	Q16581|O43771|Q92868|	C3AR_HUMAN
Q9P296	C5AR2	G-Protein Coupled Receptor	Family 1	C5a anaphylatoxin chemotactic receptor 2	34	-	12	0.00024959	-	-	adrenal gland glandular cells|appendix lymphoid tissue|bone marrow hematopoietic cells|bronchus respiratory epithelial cells|caudate neuronal cells|cerebellum Purkinje cells|cerebellum cells in granular layer|cerebellum cells in molecular layer|cerebral cortex neuronal cells|cerebral cortex neuropil|colon glandular cells|colon peripheral nerve/ganglion|duodenum glandular cells|epididymis glandula…	Receptor for the chemotactic and inflammatory C3a, C4a and C5a anaphylatoxin peptides and also for their dearginated forms ASP/C3adesArg, C4adesArg and C5adesArg respectively. Couples weakly to G(i)-mediated signaling pathways.	Belongs to the G-protein coupled receptor 1 family.	Q9P296|B2RA09|	C5AR2_HUMAN
Q15743	GPR68	G-Protein Coupled Receptor	Family 1	Ovarian cancer G-protein coupled receptor 1	-	3	11	0.0001126	-	Liver Cirrhosis, Experimental|Amelogenesis Imperfecta hypomaturation type|	-	Proton-sensing receptor involved in pH homeostasis. May represents an osteoblastic pH sensor regulating cell-mediated responses to acidosis in bone. Mediates its action by association with G proteins that stimulates inositol phosphate (IP) production or Ca(2+) mobilization. The receptor is almost silent at pH 7.8 but fully activated at pH 6.8. Function also as a metastasis suppressor gene in pros…	Belongs to the G-protein coupled receptor 1 family.	Q15743|Q13334|Q4VBB4|Q6IX34|	OGR1_HUMAN
P25929	NPY1R	G-Protein Coupled Receptor	Family 1	Neuropeptide Y receptor type 1	-	7	11	0.00013533	-	Depressive disorder|Obesity|Psychoses, Substance-Induced|Schizophrenia|Nonorganic psychosis|	-	Receptor for neuropeptide Y and peptide YY. The rank order of affinity of this receptor for pancreatic polypeptides is NPY > [Pro-34] PYY, PYY and [Leu-31, Pro-34] NPY > NPY (2-36) > [Ile-31, Gln-34] PP and PYY (3-36) > PP > NPY free acid.	Belongs to the G-protein coupled receptor 1 family.	P25929|B2R6H5|	NPY1R_HUMAN
P43119	PTGIR	G-Protein Coupled Receptor	Family 1	Prostacyclin receptor	-	13	11	0.0005795	-	Asthma, Aspirin-Induced|	-	Receptor for prostacyclin (prostaglandin I2 or PGI2). The activity of this receptor is mediated by G(s) proteins which activate adenylate cyclase.	Belongs to the G-protein coupled receptor 1 family.	P43119|	PI2R_HUMAN
P11229	CHRM1	G-Protein Coupled Receptor	Family 1	Muscarinic acetylcholine receptor M1	8	-	11	0.00043175	-	Brain Ischemia|Epilepsy|Memory Disorders|Schizophrenia|Chronic schizophrenia|	cerebellum Purkinje cells|cerebellum cells in molecular layer|cerebral cortex neuronal cells|cerebral cortex neuropil|colon peripheral nerve/ganglion|hippocampus neuronal cells|kidney cells in glomeruli|testis cells in seminiferous ducts|	The muscarinic acetylcholine receptor mediates various cellular responses, including inhibition of adenylate cyclase, breakdown of phosphoinositides and modulation of potassium channels through the action of G proteins. Primary transducing effect is Pi turnover.	Belongs to the G-protein coupled receptor 1 family. Muscarinic acetylcholine receptor subfamily. CHRM1 sub-subfamily.	P11229|Q96RH1|	ACM1_HUMAN
P30874	SSTR2	G-Protein Coupled Receptor	Family 1	Somatostatin receptor type 2	45	-	11	0.00018205	-	Pancreatic Neoplasm|Status Epilepticus|	adrenal gland glandular cells|appendix glandular cells|breast glandular cells|bronchus respiratory epithelial cells|cerebellum cells in granular layer|cerebellum cells in molecular layer|cerebral cortex neuronal cells|cerebral cortex neuropil|cervix, uterine squamous epithelial cells|colon glandular cells|colon peripheral nerve/ganglion|duodenum glandular cells|endometrium glandular cells|epididy…	Receptor for somatostatin-14 and -28. This receptor is coupled via pertussis toxin sensitive G proteins to inhibition of adenylyl cyclase. In addition it stimulates phosphotyrosine phosphatase and PLC via pertussis toxin insensitive as well as sensitive G proteins. Inhibits calcium entry by suppressing voltage-dependent calcium channels. Acts as the functionally dominant somatostatin receptor in …	Belongs to the G-protein coupled receptor 1 family.	P30874|A8K3Y0|B2R9P7|Q4VBP0|Q96GE0|Q96TF2|Q9BWH1|	SSR2_HUMAN
Q13258	PTGDR	G-Protein Coupled Receptor	Family 1	Prostaglandin D2 receptor	-	-	11	0.00276572	-	ASTHMA-RELATED TRAITS, SUSCEPTIBILITY TO, 1|	-	Receptor for prostaglandin D2 (PGD2). The activity of this receptor is mainly mediated by G(s) proteins that stimulate adenylate cyclase, resulting in an elevation of intracellular cAMP. A mobilization of calcium is also observed, but without formation of inositol 1,4,5-trisphosphate (By similarity).	Belongs to the G-protein coupled receptor 1 family.	Q13258|G3V5L3|Q13250|Q13251|Q1ZZ52|	PD2R_HUMAN
Q15722	LTB4R	G-Protein Coupled Receptor	Family 1	Leukotriene B4 receptor 1	7	-	11	0.00022674	-	-	bone marrow hematopoietic cells|caudate neuronal cells|cerebellum cells in molecular layer|cerebral cortex neuronal cells|lung macrophages|soft tissue fibroblasts|spleen cells in red pulp|	Receptor for extracellular ATP > UTP and ADP. The activity of this receptor is mediated by G proteins which activate a phosphatidylinositol-calcium second messenger system. May be the cardiac P2Y receptor involved in the regulation of cardiac muscle contraction through modulation of L-type calcium currents. Is a receptor for leukotriene B4, a potent chemoattractant involved in inflammation and im…	Belongs to the G-protein coupled receptor 1 family.	Q15722|Q13305|Q53XV5|Q92641|Q9BSU5|	LT4R1_HUMAN
Q9H228	S1PR5	G-Protein Coupled Receptor	Family 1	Sphingosine 1-phosphate receptor 5	10	-	11	0.00051088	-	Diabetes Mellitus, Experimental|	caudate glial cells|cerebral cortex neuropil|lung macrophages|lymph node non-germinal center cells|skin Langerhans|skin epidermal cells|skin keratinocytes|skin melanocytes|spleen cells in red pulp|tonsil non-germinal center cells|	Receptor for the lysosphingolipid sphingosine 1- phosphate (S1P). S1P is a bioactive lysophospholipid that elicits diverse physiological effect on most types of cells and tissues. Is coupled to both the G(i/0)alpha and G(12) subclass of heteromeric G-proteins (By similarity). May play a regulatory role in the transformation of radial glial cells into astrocytes and may affect proliferative activi…	Belongs to the G-protein coupled receptor 1 family.	Q9H228|Q6NW11|	S1PR5_HUMAN
O15529	GPR42	G-Protein Coupled Receptor	Family 1	G-protein coupled receptor 42	-	7	10	7.407e-05	-	-	-	Probable G protein-coupled receptor that may be activated by a major product of dietary fiber digestion, the short chain fatty acids (SCFAs), and that may play a role in the regulation of whole-body energy homeostasis and/or in intestinal immunity.	Belongs to the G-protein coupled receptor 1 family.	O15529|	GPR42_HUMAN
Q99705	MCHR1	G-Protein Coupled Receptor	Family 1	Melanin-concentrating hormone receptor 1	-	7	10	0.00019856	-	Bipolar Disorder|Mental Depression|Depressive disorder|Schizophrenia|	-	Receptor for melanin-concentrating hormone, coupled to both G proteins that inhibit adenylyl cyclase and G proteins that activate phosphoinositide hydrolysis.	Belongs to the G-protein coupled receptor 1 family.	Q99705|B2RBX6|Q5R3J1|Q96S47|Q9BV08|	MCHR1_HUMAN
P08100	RHO	G-Protein Coupled Receptor	Family 1	Rhodopsin	1	10	10	0.00295124	-	Glaucoma|Conductive hearing loss|Sensorineural Hearing Loss (disorder)|Hyperinsulinism|Hypogonadism|Keratoconus|Mental Retardation|Night Blindness|Nystagmus|Obesity|Optic Atrophy|Retinitis Pigmentosa|Cataract|Congenital hypoplasia of penis|Severe myopia|Blindness, Legal|Fundus Albipunctatus|Night blindness, congenital stationary|Mental deficiency|Hypoplasia of optic disc|Oguchi disease|Retinitis …	retina cells in photoreceptor layer |	Photoreceptor required for image-forming vision at low light intensity (PubMed:8107847, PubMed:7846071). Required for photoreceptor cell viability after birth (PubMed:2215617, PubMed:12566452). Light-induced isomerization of the chromophore 11-cis-retinal to all-trans-retinal triggers a conformational change that activates signaling via G-proteins (PubMed:8107847, PubMed:28524165, PubMed:26200343…	Belongs to the G-protein coupled receptor 1 family. Opsin subfamily.	P08100|Q16414|Q2M249|	OPSD_HUMAN
Q96G91	P2RY11	G-Protein Coupled Receptor	Family 1	P2Y purinoceptor 11	61	14	10	0.00021127	-	Cataplexy|Hallucinations|Narcolepsy|Amnesia, Transient Global|Narcolepsy-Cataplexy Syndrome|Abnormality of vision|	adrenal gland glandular cells|appendix glandular cells|appendix lymphoid tissue|bone marrow hematopoietic cells|breast glandular cells|breast myoepithelial cells|bronchus respiratory epithelial cells|caudate glial cells|caudate neuronal cells|cerebellum Purkinje cells|cerebellum cells in granular layer|cerebellum cells in molecular layer|cerebral cortex neuronal cells|cerebral cortex neuropil|cer…	Receptor for ATP and ADP coupled to G-proteins that activate both phosphatidylinositol-calcium and adenylyl cyclase second messenger systems. Not activated by UTP or UDP.	Belongs to the G-protein coupled receptor 1 family.	Q96G91|B2R8X9|O43190|Q9BYU4|Q9H170|	P2Y11_HUMAN
P13945	ADRB3	G-Protein Coupled Receptor	Family 1	Beta-3 adrenergic receptor	2	-	10	0.00025077	-	Diabetes Mellitus, Experimental|Heart failure|Hyperlipidemia|Obesity|Schizophrenia|Unipolar Depression|Left Ventricular Hypertrophy|Major Depressive Disorder|	caudate neuronal projections|soft tissue adipocytes|	Beta-adrenergic receptors mediate the catecholamine- induced activation of adenylate cyclase through the action of G proteins. Beta-3 is involved in the regulation of lipolysis and thermogenesis.	Belongs to the G-protein coupled receptor 1 family. Adrenergic receptor subfamily. ADRB3 sub-subfamily.	P13945|Q4JFT4|	ADRB3_HUMAN
P18825	ADRA2C	G-Protein Coupled Receptor	Family 1	Alpha-2C adrenergic receptor	-	-	10	0.00015277	-	Bipolar Disorder|Heart failure|	-	Alpha-2 adrenergic receptors mediate the catecholamine- induced inhibition of adenylate cyclase through the action of G proteins.	Belongs to the G-protein coupled receptor 1 family. Adrenergic receptor subfamily. ADRA2C sub-subfamily.	P18825|P35369|Q9HB49|	ADA2C_HUMAN
P21462	FPR1	G-Protein Coupled Receptor	Family 1	fMet-Leu-Phe receptor	20	-	10	0.00015787	-	-	appendix glandular cells|bone marrow hematopoietic cells|colon endothelial cells|colon glandular cells|epididymis glandular cells|heart muscle myocytes|lung pneumocytes|lymph node germinal center cells|lymph node non-germinal center cells|rectum glandular cells|skeletal muscle myocytes|skin Langerhans|skin keratinocytes|small intestine glandular cells|spleen cells in red pulp|spleen cells in whit…	High affinity receptor for N-formyl-methionyl peptides (fMLP), which are powerful neutrophil chemotactic factors (PubMed:2161213, PubMed:2176894, PubMed:10514456, PubMed:15153520). Binding of fMLP to the receptor stimulates intracellular calcium mobilization and superoxide anion release (PubMed:2161213, PubMed:1712023, PubMed:15153520). This response is mediated via a G-protein that activates a p…	Belongs to the G-protein coupled receptor 1 family.	P21462|Q14939|Q7Z6A4|Q86U52|Q9NS48|	FPR1_HUMAN
P32302	CXCR5	G-Protein Coupled Receptor	Family 1	C-X-C chemokine receptor type 5	39	-	10	0.00021008	-	Biliary cirrhosis|	adrenal gland glandular cells|appendix glandular cells|appendix lymphoid tissue|bone marrow hematopoietic cells|breast glandular cells|breast myoepithelial cells|bronchus respiratory epithelial cells|caudate neuronal cells|cerebellum Purkinje cells|cerebral cortex neuronal cells|cervix, uterine squamous epithelial cells|colon peripheral nerve/ganglion|endometrium cells in endometrial stroma|endom…	Cytokine receptor that binds to B-lymphocyte chemoattractant (BLC). Involved in B-cell migration into B-cell follicles of spleen and Peyer patches but not into those of mesenteric or peripheral lymph nodes. May have a regulatory function in Burkitt lymphoma (BL) lymphomagenesis and/or B-cell differentiation.	Belongs to the G-protein coupled receptor 1 family.	P32302|Q14811|	CXCR5_HUMAN
P32745	SSTR3	G-Protein Coupled Receptor	Family 1	Somatostatin receptor type 3	10	-	10	0.00030325	-	Pancreatic Neoplasm|Status Epilepticus|	caudate neuronal cells|cerebellum Purkinje cells|cerebral cortex neuronal cells|cerebral cortex neuropil|duodenum glandular cells|hippocampus neuronal cells|testis pachytene spermatocytes|testis peritubular cells|testis round or early spermatids|testis spermatogonia|	Receptor for somatostatin-14 and -28. This receptor is coupled via pertussis toxin sensitive G proteins to inhibition of adenylyl cyclase.	Belongs to the G-protein coupled receptor 1 family.	P32745|A8K550|Q53ZR7|	SSR3_HUMAN
P35368	ADRA1B	G-Protein Coupled Receptor	Family 1	Alpha-1B adrenergic receptor	-	-	10	0.00029465	-	Liver Cirrhosis, Experimental|	-	This alpha-adrenergic receptor mediates its action by association with G proteins that activate a phosphatidylinositol- calcium second messenger system. Its effect is mediated by G(q) and G(11) proteins. Nuclear ADRA1A-ADRA1B heterooligomers regulate phenylephrine (PE)-stimulated ERK signaling in cardiac myocytes.	Belongs to the G-protein coupled receptor 1 family. Adrenergic receptor subfamily. ADRA1B sub-subfamily.	P35368|B0LPE1|	ADA1B_HUMAN
P37288	AVPR1A	G-Protein Coupled Receptor	Family 1	Vasopressin V1a receptor	-	-	10	0.0002161	-	Congenital adrenal hyperplasia|Autistic Disorder|Schizophrenia|Autism Spectrum Disorders|	-	Receptor for arginine vasopressin. The activity of this receptor is mediated by G proteins which activate a phosphatidyl- inositol-calcium second messenger system. Has been involved in social behaviors, including affiliation and attachment.	Belongs to the G-protein coupled receptor 1 family. Vasopressin/oxytocin receptor subfamily.	P37288|	V1AR_HUMAN
P51679	CCR4	G-Protein Coupled Receptor	Family 1	C-C chemokine receptor type 4	30	-	10	0.00032912	-	Celiac Disease|Brain Ischemia|Glioma|Adult T-Cell Lymphoma/Leukemia|Sezary Syndrome|	bone marrow hematopoietic cells|breast glandular cells|breast myoepithelial cells|bronchus respiratory epithelial cells|caudate glial cells|caudate neuronal cells|cerebellum Purkinje cells|colon endothelial cells|duodenum glandular cells|epididymis glandular cells|esophagus squamous epithelial cells|gallbladder glandular cells|heart muscle myocytes|hippocampus neuronal cells|lung macrophages|lymp…	High affinity receptor for the C-C type chemokines CCL17/TARC, CCL22/MDC and CKLF isoform 1/CKLF1. The activity of this receptor is mediated by G(i) proteins which activate a phosphatidylinositol-calcium second messenger system. Can function as a chemoattractant homing receptor on circulating memory lymphocytes and as a coreceptor for some primary HIV-2 isolates. In the CNS, could mediate hippoca…	Belongs to the G-protein coupled receptor 1 family.	P51679|Q9ULY6|Q9ULY7|	CCR4_HUMAN
Q13585	GPR50	G-Protein Coupled Receptor	Family 1	Melatonin-related receptor	1	-	10	0.00124555	-	Bipolar Disorder|Schizophrenia|Seasonal Affective Disorder|Autism Spectrum Disorders|	pituitary gland cells in anterior |	Does not bind melatonin.	Belongs to the G-protein coupled receptor 1 family.	Q13585|Q0VGG3|Q3ZAR0|	MTR1L_HUMAN
Q99679	GPR21	G-Protein Coupled Receptor	Family 1	Probable G-protein coupled receptor 21	-	-	10	0.00283855	-	-	-	Orphan receptor.	Belongs to the G-protein coupled receptor 1 family.	Q99679|B2R8W9|Q6NXU2|	GPR21_HUMAN
Q9GZQ4	NMUR2	G-Protein Coupled Receptor	Family 1	Neuromedin-U receptor 2	16	-	10	0.00017359	-	Alcoholic Intoxication, Chronic|	cerebellum Purkinje cells|cerebellum cells in granular layer|cerebral cortex endothelial cells|cerebral cortex neuronal cells|cerebral cortex neuropil|hippocampus glial cells|hippocampus neuronal cells|stomach glandular cells|testis Leydig cells|testis elongated or late spermatids|testis pachytene spermatocytes|testis preleptotene spermatocytes|testis round or early spermatids|testis sertoli cell…	Receptor for the neuromedin-U and neuromedin-S neuropeptides.	Belongs to the G-protein coupled receptor 1 family.	Q9GZQ4|Q7LC54|Q96AM5|Q9NRA6|	NMUR2_HUMAN
P28222	HTR1B	G-Protein Coupled Receptor	Family 1	5-hydroxytryptamine receptor 1B	3	11	9	0.00040317	-	Alcoholic Intoxication, Chronic|Autistic Disorder|Bipolar Disorder|Cocaine Abuse|Mental Depression|Depressive disorder|Unipolar Depression|Cocaine Dependence|Major Depressive Disorder|	cerebral cortex endothelial cells|colon endothelial cells|placenta decidual cells|	G-protein coupled receptor for 5-hydroxytryptamine (serotonin). Also functions as a receptor for ergot alkaloid derivatives, various anxiolytic and antidepressant drugs and other psychoactive substances, such as lysergic acid diethylamide (LSD). Ligand binding causes a conformation change that triggers signaling via guanine nucleotide-binding proteins (G proteins) and modulates the activity of do…	Belongs to the G-protein coupled receptor 1 family.	P28222|Q4VAY7|	5HT1B_HUMAN
P47211	GALR1	G-Protein Coupled Receptor	Family 1	Galanin receptor type 1	-	11	9	9.089e-05	-	Alcoholic Intoxication, Chronic|Alcohol abuse|Cocaine Dependence|	-	Receptor for the hormone galanin. The activity of this receptor is mediated by G proteins that inhibit adenylate cyclase activity.	Belongs to the G-protein coupled receptor 1 family.	P47211|Q4VBL7|	GALR1_HUMAN
O14842	FFAR1	G-Protein Coupled Receptor	Family 1	Free fatty acid receptor 1	-	-	9	7.407e-05	-	-	-	G-protein coupled receptor for medium and long chain saturated and unsaturated fatty acids that plays an important role in glucose homeostasis. Fatty acid binding increases glucose- stimulated insulin secretion, and may also enhance the secretion of glucagon-like peptide 1 (GLP-1). May also play a role in bone homeostasis; receptor signaling activates pathways that inhibit osteoclast differentiat…	Belongs to the G-protein coupled receptor 1 family.	O14842|Q0VAS2|Q4VBL4|	FFAR1_HUMAN
O14843	FFAR3	G-Protein Coupled Receptor	Family 1	Free fatty acid receptor 3	65	-	9	7.407e-05	-	-	adrenal gland glandular cells|appendix glandular cells|appendix lymphoid tissue|bone marrow hematopoietic cells|breast adipocytes|breast glandular cells|breast myoepithelial cells|bronchus respiratory epithelial cells|caudate glial cells|caudate neuronal cells|cerebellum Purkinje cells|cerebral cortex endothelial cells|cerebral cortex glial cells|cerebral cortex neuropil|cervix, uterine glandular…	G protein-coupled receptor that is activated by a major product of dietary fiber digestion, the short chain fatty acids (SCFAs), and that plays a role in the regulation of whole-body energy homeostasis and in intestinal immunity. In omnivorous mammals, the short chain fatty acids acetate, propionate and butyrate are produced primarily by the gut microbiome that metabolizes dietary fibers. SCFAs s…	Belongs to the G-protein coupled receptor 1 family.	O14843|B2RWM8|Q14CM7|	FFAR3_HUMAN
O95665	NTSR2	G-Protein Coupled Receptor	Family 1	Neurotensin receptor type 2	-	-	9	0.00037591	-	-	-	Receptor for the tridecapeptide neurotensin. It is associated with G proteins that activate a phosphatidylinositol- calcium second messenger system.	Belongs to the G-protein coupled receptor 1 family. Neurotensin receptor subfamily. NTSR2 sub-subfamily.	O95665|Q53QQ5|Q57Z87|Q8IY58|Q8TBH6|	NTR2_HUMAN
P08588	ADRB1	G-Protein Coupled Receptor	Family 1	Beta-1 adrenergic receptor	6	-	9	0.00046528	-	Mental Depression|Depressive disorder|Heart failure|Hyperemia|Obesity|Myocardial Ischemia|	caudate glial cells|cerebral cortex glial cells|heart muscle myocytes|hippocampus glial cells|hippocampus neuronal cells|placenta trophoblastic cells|	Beta-adrenergic receptors mediate the catecholamine- induced activation of adenylate cyclase through the action of G proteins. This receptor binds epinephrine and norepinephrine with approximately equal affinity. Mediates Ras activation through G(s)-alpha- and cAMP-mediated signaling.	Belongs to the G-protein coupled receptor 1 family. Adrenergic receptor subfamily. ADRB1 sub-subfamily.	P08588|B0LPE2|Q5T5Y4|Q9UKG7|Q9UKG8|	ADRB1_HUMAN
P25100	ADRA1D	G-Protein Coupled Receptor	Family 1	Alpha-1D adrenergic receptor	-	-	9	0.00012674	-	-	-	This alpha-adrenergic receptor mediates its effect through the influx of extracellular calcium.	Belongs to the G-protein coupled receptor 1 family. Adrenergic receptor subfamily. ADRA1D sub-subfamily.	P25100|Q9NPY0|	ADA1D_HUMAN
P25106	ACKR3	G-Protein Coupled Receptor	Family 1	Atypical chemokine receptor 3	40	-	9	0.00026551	-	Rheumatoid Arthritis|Liver Cirrhosis, Experimental|	appendix glandular cells|appendix lymphoid tissue|breast adipocytes|breast glandular cells|breast myoepithelial cells|bronchus respiratory epithelial cells|colon endothelial cells|colon glandular cells|duodenum glandular cells|endometrium glandular cells|epididymis glandular cells|esophagus squamous epithelial cells|fallopian tube glandular cells|gallbladder glandular cells|heart muscle myocytes|…	Atypical chemokine receptor that controls chemokine levels and localization via high-affinity chemokine binding that is uncoupled from classic ligand-driven signal transduction cascades, resulting instead in chemokine sequestration, degradation, or transcytosis. Also known as interceptor (internalizing receptor) or chemokine-scavenging receptor or chemokine decoy receptor. Acts as a receptor for …	Belongs to the G-protein coupled receptor 1 family. Atypical chemokine receptor subfamily.	P25106|A8K6J4|Q53RV4|Q8NE10|Q92938|Q92986|	ACKR3_HUMAN
P28223	HTR2A	G-Protein Coupled Receptor	Family 1	5-hydroxytryptamine receptor 2A	4	-	9	0.00046851	-	Alcoholic Intoxication, Chronic|Anorexia Nervosa|Autistic Disorder|Bipolar Disorder|Mental Depression|Depressive disorder|Dyskinetic syndrome|Chronic Obstructive Airway Disease|Single major depressive episode|Obesity|Obsessive-Compulsive Disorder|Psychoses, Drug|Schizophrenia|Unipolar Depression|Seasonal Affective Disorder|Alcohol abuse|Severe major depression with psychotic features|Major Depres…	caudate glial cells|caudate neuronal cells|cerebral cortex neuronal cells|cerebral cortex neuropil|	G-protein coupled receptor for 5-hydroxytryptamine (serotonin) (PubMed:1330647, PubMed:18703043, PubMed:19057895). Also functions as a receptor for various drugs and psychoactive substances, including mescaline, psilocybin, 1-(2,5-dimethoxy-4- iodophenyl)-2-aminopropane (DOI) and lysergic acid diethylamide (LSD) (PubMed:28129538). Ligand binding causes a conformation change that triggers signalin…	Belongs to the G-protein coupled receptor 1 family.	P28223|B2RAC5|B4DZ79|F5GWE8|Q5T8C0|	5HT2A_HUMAN
P30550	GRPR	G-Protein Coupled Receptor	Family 1	Gastrin-releasing peptide receptor	-	-	9	8.847e-05	-	Mental Depression|Depressive disorder|Memory Disorders|	-	Receptor for gastrin-releasing peptide (GRP) (PubMed:1655761). Signals via association with G proteins that activate a phosphatidylinositol-calcium second messenger system, resulting in Akt phosphorylation. Contributes to the regulation of food intake. Contributes to the perception of prurient stimuli and transmission of itch signals in the spinal cord that promote scratching behavior, but does n…	Belongs to the G-protein coupled receptor 1 family.	P30550|B2R910|	GRPR_HUMAN
P32238	CCKAR	G-Protein Coupled Receptor	Family 1	Cholecystokinin receptor type A	-	-	9	9.53e-05	-	Alcoholic Intoxication, Chronic|Bipolar Disorder|gallbladder neoplasm|Schizophrenia|Paranoid Schizophrenia|Unipolar Depression|Major Depressive Disorder|	-	Receptor for cholecystokinin. Mediates pancreatic growth and enzyme secretion, smooth muscle contraction of the gall bladder and stomach. Has a 1000-fold higher affinity for CCK rather than for gastrin. It modulates feeding and dopamine-induced behavior in the central and peripheral nervous system. This receptor mediates its action by association with G proteins that activate a phosphatidylinosit…	Belongs to the G-protein coupled receptor 1 family.	P32238|B2R9Z5|	CCKAR_HUMAN
P32248	CCR7	G-Protein Coupled Receptor	Family 1	C-C chemokine receptor type 7	7	-	9	0.00013129	-	Adult T-Cell Lymphoma/Leukemia|Status Epilepticus|Anhedonia|	appendix lymphoid tissue|bone marrow hematopoietic cells|lung pneumocytes|lymph node non-germinal center cells|spleen cells in red pulp|spleen cells in white pulp|tonsil non-germinal center cells|	Receptor for the MIP-3-beta chemokine. Probable mediator of EBV effects on B-lymphocytes or of normal lymphocyte functions.	Belongs to the G-protein coupled receptor 1 family.	P32248|	CCR7_HUMAN
P50052	AGTR2	G-Protein Coupled Receptor	Family 1	Type-2 angiotensin II receptor	-	-	9	0.00015067	-	Mental Retardation|Ovarian Cysts|Left Ventricular Hypertrophy|Carcinoma, Lobular|Diabetic Cardiomyopathies|Mental deficiency|Mental Retardation, X-Linked|	-	Receptor for angiotensin II. Cooperates with MTUS1 to inhibit ERK2 activation and cell proliferation.	Belongs to the G-protein coupled receptor 1 family.	P50052|B2R9V1|Q13016|Q6FGY7|	AGTR2_HUMAN
Q15761	NPY5R	G-Protein Coupled Receptor	Family 1	Neuropeptide Y receptor type 5	-	-	9	0.00035858	-	Alcoholic Intoxication, Chronic|Obesity|Alcohol abuse|	-	Receptor for neuropeptide Y and peptide YY. The activity of this receptor is mediated by G proteins that inhibit adenylate cyclase activity. Seems to be associated with food intake. Could be involved in feeding disorders.	Belongs to the G-protein coupled receptor 1 family.	Q15761|Q6GTR7|Q92916|	NPY5R_HUMAN
Q9HB89	NMUR1	G-Protein Coupled Receptor	Family 1	Neuromedin-U receptor 1	-	-	9	7.407e-05	-	-	-	Receptor for the neuromedin-U and neuromedin-S neuropeptides.	Belongs to the G-protein coupled receptor 1 family.	Q9HB89|O43664|Q7LDP6|Q8NE20|	NMUR1_HUMAN
Q9HBX9	RXFP1	G-Protein Coupled Receptor	Family 1	Relaxin receptor 1	27	-	9	0.00065918	-	Endometriosis|	appendix glandular cells|breast glandular cells|breast myoepithelial cells|bronchus respiratory epithelial cells|caudate neuronal cells|cerebellum Purkinje cells|cervix, uterine glandular cells|cervix, uterine squamous epithelial cells|epididymis glandular cells|esophagus squamous epithelial cells|gallbladder glandular cells|lung macrophages|nasopharynx respiratory epithelial cells|oral mucosa sq…	Receptor for relaxins. The activity of this receptor is mediated by G proteins leading to stimulation of adenylate cyclase and an increase of cAMP. Binding of the ligand may also activate a tyrosine kinase pathway that inhibits the activity of a phosphodiesterase that degrades cAMP.	Belongs to the G-protein coupled receptor 1 family.	Q9HBX9|B4DHD1|B4DTV2|Q2M215|Q3KU24|Q3KU25|Q3KU26|	RXFP1_HUMAN
P28221	HTR1D	G-Protein Coupled Receptor	Family 1	5-hydroxytryptamine receptor 1D	-	11	8	2.29e-06	-	Autistic Disorder|Depressive disorder|Obsessive-Compulsive Disorder|Schizophrenia|	-	G-protein coupled receptor for 5-hydroxytryptamine (serotonin). Also functions as a receptor for ergot alkaloid derivatives, various anxiolytic and antidepressant drugs and other psychoactive substances. Ligand binding causes a conformation change that triggers signaling via guanine nucleotide-binding proteins (G proteins) and modulates the activity of down-stream effectors, such as adenylate cyc…	Belongs to the G-protein coupled receptor 1 family.	P28221|	5HT1D_HUMAN
P51582	P2RY4	G-Protein Coupled Receptor	Family 1	P2Y purinoceptor 4	-	14	8	4.867e-05	-	-	-	Receptor for UTP and UDP coupled to G-proteins that activate a phosphatidylinositol-calcium second messenger system. Not activated by ATP or ADP.	Belongs to the G-protein coupled receptor 1 family.	P51582|Q4VBB7|Q4VBB8|Q502W2|Q5JT22|	P2RY4_HUMAN
Q15077	P2RY6	G-Protein Coupled Receptor	Family 1	P2Y purinoceptor 6	-	14	8	4.867e-05	-	-	-	Receptor for extracellular UDP > UTP > ATP. The activity of this receptor is mediated by G proteins which activate a phosphatidylinositol-calcium second messenger system.	Belongs to the G-protein coupled receptor 1 family.	Q15077|Q15754|	P2RY6_HUMAN
O95977	S1PR4	G-Protein Coupled Receptor	Family 1	Sphingosine 1-phosphate receptor 4	-	-	8	5.039e-05	-	Diabetes Mellitus, Experimental|	-	Receptor for the lysosphingolipid sphingosine 1- phosphate (S1P). S1P is a bioactive lysophospholipid that elicits diverse physiological effect on most types of cells and tissues. May be involved in cell migration processes that are specific for lymphocytes.	Belongs to the G-protein coupled receptor 1 family.	O95977|D6W612|	S1PR4_HUMAN
P08912	CHRM5	G-Protein Coupled Receptor	Family 1	Muscarinic acetylcholine receptor M5	-	-	8	0.00013316	-	Marijuana Abuse|Schizophrenia|Substance Withdrawal Syndrome|	-	The muscarinic acetylcholine receptor mediates various cellular responses, including inhibition of adenylate cyclase, breakdown of phosphoinositides and modulation of potassium channels through the action of G proteins. Primary transducing effect is Pi turnover.	Belongs to the G-protein coupled receptor 1 family. Muscarinic acetylcholine receptor subfamily. CHRM5 sub-subfamily.	P08912|Q96RG7|	ACM5_HUMAN
P0DMS8	ADORA3	G-Protein Coupled Receptor	Family 1	Adenosine receptor A3	-	-	8	4.1e-05	-	Liver Cirrhosis, Experimental|Myocardial Infarction|	-	Isoform 2: Receptor for adenosine. The activity of this receptor is mediated by G proteins which inhibits adenylyl cyclase (PubMed:8234299).	Belongs to the G-protein coupled receptor 1 family.	P0DMS8|A2A3P4|P33765|Q6UWU0|Q9BYZ1|	AA3R_HUMAN
P18089	ADRA2B	G-Protein Coupled Receptor	Family 1	Alpha-2B adrenergic receptor	8	-	8	1.874e-05	-	Blepharospasm|Generalized seizures|Tonic - clonic seizures|EPILEPSY, FAMILIAL ADULT MYOCLONIC, 1|	cerebellum Purkinje cells|gallbladder glandular cells|liver hepatocytes|nasopharynx respiratory epithelial cells|seminal vesicle glandular cells|skeletal muscle myocytes|soft tissue chondrocytes|testis cells in seminiferous ducts|	Alpha-2 adrenergic receptors mediate the catecholamine- induced inhibition of adenylate cyclase through the action of G proteins. The rank order of potency for agonists of this receptor is clonidine > norepinephrine > epinephrine = oxymetazoline > dopamine > p-tyramine = phenylephrine > serotonin > p-synephrine / p-octopamine. For antagonists, the rank order is yohimbine > chlorpromazine > phento…	Belongs to the G-protein coupled receptor 1 family. Adrenergic receptor subfamily. ADRA2B sub-subfamily.	P18089|A2RUS0|Q4TUH9|Q53RF2|Q9BZK0|	ADA2B_HUMAN
P25090	FPR2	G-Protein Coupled Receptor	Family 1	N-formyl peptide receptor 2	16	-	8	0.00014591	-	Crohn Disease|	adrenal gland glandular cells|appendix glandular cells|bone marrow hematopoietic cells|caudate neuronal cells|cerebellum Purkinje cells|colon glandular cells|duodenum glandular cells|liver hepatocytes|pancreas exocrine glandular cells|placenta trophoblastic cells|rectum glandular cells|skin epidermal cells|skin keratinocytes|small intestine glandular cells|spleen cells in red pulp|thyroid gland g…	Low affinity receptor for N-formyl-methionyl peptides, which are powerful neutrophils chemotactic factors. Binding of FMLP to the receptor causes activation of neutrophils. This response is mediated via a G-protein that activates a phosphatidylinositol-calcium second messenger system. The activation of LXA4R could result in an anti-inflammatory outcome counteracting the actions of proinflammatory…	Belongs to the G-protein coupled receptor 1 family.	P25090|A8K3E2|	FPR2_HUMAN
P28566	HTR1E	G-Protein Coupled Receptor	Family 1	5-hydroxytryptamine receptor 1E	65	-	8	0.00014252	-	-	adrenal gland glandular cells|appendix glandular cells|bone marrow hematopoietic cells|breast glandular cells|bronchus respiratory epithelial cells|caudate glial cells|caudate neuronal cells|cerebellum Purkinje cells|cerebellum cells in granular layer|cerebellum cells in molecular layer|cerebral cortex endothelial cells|cerebral cortex glial cells|cerebral cortex neuronal cells|cerebral cortex ne…	G-protein coupled receptor for 5-hydroxytryptamine (serotonin). Also functions as a receptor for various alkaloids and psychoactive substances. Ligand binding causes a conformation change that triggers signaling via guanine nucleotide-binding proteins (G proteins) and modulates the activity of down-stream effectors, such as adenylate cyclase. Signaling inhibits adenylate cyclase activity.	Belongs to the G-protein coupled receptor 1 family.	P28566|E1P503|Q9P1Y1|	5HT1E_HUMAN
P30989	NTSR1	G-Protein Coupled Receptor	Family 1	Neurotensin receptor type 1	-	-	8	0.00019317	-	Alcoholic Intoxication, Chronic|Schizophrenia|Autism Spectrum Disorders|	-	G-protein coupled receptor for the tridecapeptide neurotensin (NTS) (PubMed:8381365, PubMed:21725197, PubMed:23140271). Signaling is effected via G proteins that activate a phosphatidylinositol-calcium second messenger system. Signaling leads to the activation of downstream MAP kinases and protects cells against apoptosis (PubMed:21725197).	Belongs to the G-protein coupled receptor 1 family. Neurotensin receptor subfamily. NTSR1 sub-subfamily.	P30989|Q9H4H1|Q9H4T5|	NTR1_HUMAN
P32245	MC4R	G-Protein Coupled Receptor	Family 1	Melanocortin receptor 4	44	-	8	0.00274829	-	Mental Depression|Depressive disorder|Hyperinsulinism|Obesity|Anhedonia|Cocaine Dependence|Obesity due to melanocortin 4 receptor deficiency|	adrenal gland glandular cells|appendix glandular cells|appendix lymphoid tissue|bone marrow hematopoietic cells|breast glandular cells|bronchus respiratory epithelial cells|cerebellum Purkinje cells|cerebral cortex neuronal cells|cervix, uterine glandular cells|colon glandular cells|duodenum glandular cells|endometrium glandular cells|epididymis glandular cells|esophagus squamous epithelial cells…	Receptor specific to the heptapeptide core common to adrenocorticotropic hormone and alpha-, beta-, and gamma-MSH. Plays a central role in energy homeostasis and somatic growth. This receptor is mediated by G proteins that stimulate adenylate cyclase (cAMP).	Belongs to the G-protein coupled receptor 1 family.	P32245|B2RAC3|Q16317|Q3MIJ6|	MC4R_HUMAN
P34972	CNR2	G-Protein Coupled Receptor	Family 1	Cannabinoid receptor 2	65	-	8	0.00028257	-	Alcoholic Intoxication, Chronic|Atherosclerosis|Bipolar Disorder|Mental Depression|Depressive disorder|Leukemia, Myelocytic, Acute|Liver Cirrhosis|Marijuana Abuse|Pancreatic Neoplasm|Pancreatitis|Schizophrenia|Alcohol abuse|Cannabis use|	adrenal gland glandular cells|appendix glandular cells|appendix lymphoid tissue|bone marrow hematopoietic cells|breast glandular cells|breast myoepithelial cells|bronchus respiratory epithelial cells|caudate glial cells|caudate neuronal cells|cerebellum Purkinje cells|cerebellum cells in granular layer|cerebellum cells in molecular layer|cerebral cortex endothelial cells|cerebral cortex neuronal …	Heterotrimeric G protein-coupled receptor for endocannabinoid 2-arachidonoylglycerol mediating inhibition of adenylate cyclase. May function in inflammatory response, nociceptive transmission and bone homeostasis.	Belongs to the G-protein coupled receptor 1 family.	P34972|C6ES44|Q4VBK8|Q5JRH7|Q6B0G7|Q6NSY0|	CNR2_HUMAN
P34995	PTGER1	G-Protein Coupled Receptor	Family 1	Prostaglandin E2 receptor EP1 subtype	-	-	8	8.595e-05	-	Squamous cell carcinoma|Invasive Ductal Breast Carcinoma|	-	Receptor for prostaglandin E2 (PGE2). The activity of this receptor is mediated by G(q) proteins which activate a phosphatidylinositol-calcium second messenger system. May play a role as an important modulator of renal function. Implicated the smooth muscle contractile response to PGE2 in various tissues.	Belongs to the G-protein coupled receptor 1 family.	P34995|Q5U5U4|Q86UH3|Q86VB5|Q8NHB2|	PE2R1_HUMAN
P41595	HTR2B	G-Protein Coupled Receptor	Family 1	5-hydroxytryptamine receptor 2B	28	-	8	0.00025723	-	Heart failure|	appendix glandular cells|breast glandular cells|bronchus respiratory epithelial cells|cervix, uterine glandular cells|cervix, uterine squamous epithelial cells|colon glandular cells|duodenum glandular cells|endometrium glandular cells|epididymis glandular cells|esophagus squamous epithelial cells|fallopian tube glandular cells|gallbladder glandular cells|kidney cells in tubules|liver bile duct ce…	G-protein coupled receptor for 5-hydroxytryptamine (serotonin) (PubMed:8143856, PubMed:7926008, PubMed:8078486, PubMed:8882600, PubMed:18703043, PubMed:23519210). Also functions as a receptor for various ergot alkaloid derivatives and psychoactive substances (PubMed:8143856, PubMed:7926008, PubMed:8078486, PubMed:12970106, PubMed:18703043, PubMed:23519210, PubMed:23519215, PubMed:24357322, PubMed…	Belongs to the G-protein coupled receptor 1 family.	P41595|B2R9D5|Q53TI1|Q62221|Q6P523|	5HT2B_HUMAN
P43088	PTGFR	G-Protein Coupled Receptor	Family 1	Prostaglandin F2-alpha receptor	-	-	8	0.00016977	-	Endometriosis|	-	Receptor for prostaglandin F2-alpha (PGF2-alpha). The activity of this receptor is mediated by G proteins which activate a phosphatidylinositol-calcium second messenger system. Initiates luteolysis in the corpus luteum (By similarity). Isoforms 2 to 7 do not bind PGF2-alpha but are proposed to modulate signaling by participating in variant receptor complexes; heterodimers between isoform 1 and is…	Belongs to the G-protein coupled receptor 1 family.	P43088|A8K9Y0|Q2KHP3|Q6RYQ6|Q9P1X4|	PF2R_HUMAN
P43657	LPAR6	G-Protein Coupled Receptor	Family 1	Lysophosphatidic acid receptor 6	27	-	8	0.00020904	-	Alopecia|Hypotrichosis|Brittle hair|Woolly hair, congenital|Hypotrichosis simplex|HYPOTRICHOSIS 8|	adrenal gland glandular cells|appendix glandular cells|breast glandular cells|bronchus respiratory epithelial cells|cervix, uterine glandular cells|colon glandular cells|duodenum glandular cells|endometrium glandular cells|epididymis glandular cells|fallopian tube glandular cells|gallbladder glandular cells|kidney cells in tubules|liver bile duct cells|lung pneumocytes|nasopharynx respiratory epi…	Binds to oleoyl-L-alpha-lysophosphatidic acid (LPA). Intracellular cAMP is involved in the receptor activation. Important for the maintenance of hair growth and texture.	Belongs to the G-protein coupled receptor 1 family.	P43657|A4FTW9|B3KVF2|F2YGU4|O15133|Q3KPF5|Q53FA0|Q5VW44|Q7Z3S0|Q7Z3S6|	LPAR6_HUMAN
P46092	CCR10	G-Protein Coupled Receptor	Family 1	C-C chemokine receptor type 10	57	-	8	8.831e-05	-	Status Epilepticus|	adrenal gland glandular cells|appendix glandular cells|bone marrow hematopoietic cells|breast glandular cells|breast myoepithelial cells|bronchus respiratory epithelial cells|cerebellum Purkinje cells|cerebellum cells in granular layer|cerebellum cells in molecular layer|cerebral cortex neuronal cells|cerebral cortex neuropil|cervix, uterine glandular cells|cervix, uterine squamous epithelial cel…	Receptor for chemokines SCYA27 and SCYA28. Subsequently transduces a signal by increasing the intracellular calcium ions level and stimulates chemotaxis in a pre-B cell line.	Belongs to the G-protein coupled receptor 1 family.	P46092|Q4V749|Q6T7X2|Q9NZG2|	CCR10_HUMAN
P49146	NPY2R	G-Protein Coupled Receptor	Family 1	Neuropeptide Y receptor type 2	-	-	8	0.00024571	-	Alcoholic Intoxication, Chronic|Epilepsy|Epilepsy, Temporal Lobe|Substance Withdrawal Syndrome|	-	Receptor for neuropeptide Y and peptide YY. The rank order of affinity of this receptor for pancreatic polypeptides is PYY > NPY > PYY (3-36) > NPY (2-36) > [Ile-31, Gln-34] PP > [Leu- 31, Pro-34] NPY > PP, [Pro-34] PYY and NPY free acid.	Belongs to the G-protein coupled receptor 1 family.	P49146|Q13281|Q13457|Q4W5G7|Q6AZZ6|Q9UE67|	NPY2R_HUMAN
P50406	HTR6	G-Protein Coupled Receptor	Family 1	5-hydroxytryptamine receptor 6	-	-	8	0.00031783	-	Memory Disorders|Psychoses, Substance-Induced|Schizophrenia|	-	This is one of the several different receptors for 5- hydroxytryptamine (serotonin), a biogenic hormone that functions as a neurotransmitter, a hormone, and a mitogen. The activity of this receptor is mediated by G proteins that stimulate adenylate cyclase. It has a high affinity for tricyclic psychotropic drugs (By similarity). Controls pyramidal neurons migration during corticogenesis, through …	Belongs to the G-protein coupled receptor 1 family.	P50406|Q13640|Q5TGZ1|	5HT6R_HUMAN
Q13639	HTR4	G-Protein Coupled Receptor	Family 1	5-hydroxytryptamine receptor 4	14	-	8	0.0002948	-	Congenital adrenal hyperplasia|alcohol use disorder|Anorexia|Atrial Fibrillation|Bipolar Disorder|Mental Depression|Depressive disorder|Schizophrenia|Treatment-resistant schizophrenia|	caudate glial cells|caudate neuronal cells|cerebellum Purkinje cells|cerebellum cells in granular layer|cerebellum cells in molecular layer|cerebral cortex neuronal cells|cerebral cortex neuropil|colon glandular cells|colon peripheral nerve/ganglion|duodenum glandular cells|heart muscle myocytes|hippocampus neuronal cells|rectum glandular cells|small intestine glandular cells|	This is one of the several different receptors for 5- hydroxytryptamine (serotonin), a biogenic hormone that functions as a neurotransmitter, a hormone, and a mitogen. The activity of this receptor is mediated by G proteins that stimulate adenylate cyclase.	Belongs to the G-protein coupled receptor 1 family.	Q13639|C4WYH4|Q546Q1|Q684M0|Q712M9|Q96KH9|Q96KI0|Q9H199|Q9NY73|Q9UBM6|Q9UBT4|Q9UE22|Q9UE23|Q9UQR6|	5HT4R_HUMAN
Q99677	LPAR4	G-Protein Coupled Receptor	Family 1	Lysophosphatidic acid receptor 4	-	-	8	4.743e-05	-	Papillary thyroid carcinoma|	-	Receptor for lysophosphatidic acid (LPA), a mediator of diverse cellular activities. Transduces a signal by increasing the intracellular calcium ions and by stimulating adenylyl cyclase activity. The rank order of potency for agonists of this receptor is 1-oleoyl- > 1-stearoyl- > 1-palmitoyl- > 1-myristoyl- > 1- alkyl- > 1-alkenyl-LPA.	Belongs to the G-protein coupled receptor 1 family.	Q99677|B2RAC7|O15132|Q502U9|Q6NSP5|	LPAR4_HUMAN
Q9HC97	GPR35	G-Protein Coupled Receptor	Family 1	G-protein coupled receptor 35	-	-	8	0.00109239	-	Primary sclerosing cholangitis|	-	Acts as a receptor for kynurenic acid, an intermediate in the tryptophan metabolic pathway. The activity of this receptor is mediated by G-proteins that elicit calcium mobilization and inositol phosphate production through G(qi/o) proteins.	Belongs to the G-protein coupled receptor 1 family.	Q9HC97|J3KR30|O43495|Q17R58|Q4VBN5|Q4ZFV2|Q6FHI8|Q86UH4|	GPR35_HUMAN
Q9NS75	CYSLTR2	G-Protein Coupled Receptor	Family 1	Cysteinyl leukotriene receptor 2	50	-	8	0.00028684	-	Pulmonary Fibrosis|Uveal melanoma|Malignant melanoma of iris|Asthma, Aspirin-Induced|	appendix glandular cells|appendix lymphoid tissue|bone marrow hematopoietic cells|breast adipocytes|breast glandular cells|breast myoepithelial cells|bronchus respiratory epithelial cells|cerebellum Purkinje cells|cerebellum cells in molecular layer|cerebral cortex endothelial cells|cervix, uterine glandular cells|colon endothelial cells|colon glandular cells|colon peripheral nerve/ganglion|duode…	Receptor for cysteinyl leukotrienes. The response is mediated via a G-protein that activates a phosphatidylinositol- calcium second messenger system. Stimulation by BAY u9773, a partial agonist, induces specific contractions of pulmonary veins and might also have an indirect role in the relaxation of the pulmonary vascular endothelium. The rank order of affinities for the leukotrienes is LTC4 = L…	Belongs to the G-protein coupled receptor 1 family.	Q9NS75|Q9HCQ2|	CLTR2_HUMAN
Q9NSD7	RXFP3	G-Protein Coupled Receptor	Family 1	Relaxin-3 receptor 1	-	-	8	0.00017914	-	-	-	Receptor for RNL3/relaxin-3. Binding of the ligand inhibit cAMP accumulation.	Belongs to the G-protein coupled receptor 1 family.	Q9NSD7|Q14DA5|	RL3R1_HUMAN
Q9Y5X5	NPFFR2	G-Protein Coupled Receptor	Family 1	Neuropeptide FF receptor 2	-	-	8	9.819e-05	-	-	-	Receptor for NPAF (A-18-F-amide) and NPFF (F-8-F-amide) neuropeptides, also known as morphine-modulating peptides. Can also be activated by a variety of naturally occurring or synthetic FMRF-amide like ligands. This receptor mediates its action by association with G proteins that activate a phosphatidylinositol- calcium second messenger system.	Belongs to the G-protein coupled receptor 1 family.	Q9Y5X5|Q96RV1|Q9NR49|	NPFF2_HUMAN
P51677	CCR3	G-Protein Coupled Receptor	Family 1	C-C chemokine receptor type 3	25	16	7	0.00017082	-	Dermatitis, Atopic|Pulmonary Fibrosis|Status Epilepticus|Asthma, Aspirin-Induced|	adrenal gland glandular cells|bone marrow hematopoietic cells|bronchus respiratory epithelial cells|cerebral cortex endothelial cells|cerebral cortex neuronal cells|cerebral cortex neuropil|colon glandular cells|endometrium cells in endometrial stroma|esophagus squamous epithelial cells|kidney cells in glomeruli|liver hepatocytes|lung macrophages|lymph node non-germinal center cells|nasopharynx r…	Receptor for a C-C type chemokine. Binds to eotaxin, eotaxin-3, MCP-3, MCP-4, RANTES and MIP-1 delta. Subsequently transduces a signal by increasing the intracellular calcium ions level. Alternative coreceptor with CD4 for HIV-1 infection.	Belongs to the G-protein coupled receptor 1 family.	P51677|B3KVQ1|F5GWL6|Q15748|Q2YDB9|Q86WD2|Q8TDP6|Q9ULY8|	CCR3_HUMAN
O43193	MLNR	G-Protein Coupled Receptor	Family 1	Motilin receptor	-	-	7	3.184e-05	-	-	-	Receptor for motilin.	Belongs to the G-protein coupled receptor 1 family.	O43193|	MTLR_HUMAN
O43613	HCRTR1	G-Protein Coupled Receptor	Family 1	Orexin receptor type 1	2	-	7	0.00033906	-	Mental Depression|Depressive disorder|Schizophrenia|Substance Withdrawal Syndrome|	cerebellum Purkinje cells|cerebral cortex neuropil|	Moderately selective excitatory receptor for orexin-A and, with a lower affinity, for orexin-B neuropeptide (PubMed:9491897, PubMed:26950369). Triggers an increase in cytoplasmic Ca(2+) levels in response to orexin-A binding (PubMed:9491897, PubMed:26950369).	Belongs to the G-protein coupled receptor 1 family.	O43613|A8K3A6|Q9HBV6|	OX1R_HUMAN
P21918	DRD5	G-Protein Coupled Receptor	Family 1	D(1B) dopamine receptor	1	-	7	0.00014651	-	Bipolar Disorder|Blepharospasm|Depressive disorder|Attention deficit hyperactivity disorder|Benign essential blepharospasm|	cerebral cortex neuropil|	Dopamine receptor whose activity is mediated by G proteins which activate adenylyl cyclase.	Belongs to the G-protein coupled receptor 1 family.	P21918|B2R9S3|Q8NEQ8|	DRD5_HUMAN
P30872	SSTR1	G-Protein Coupled Receptor	Family 1	Somatostatin receptor type 1	34	-	7	0.00015918	-	Pancreatic Neoplasm|Status Epilepticus|	adrenal gland glandular cells|appendix glandular cells|breast glandular cells|bronchus respiratory epithelial cells|cerebral cortex neuropil|cervix, uterine squamous epithelial cells|colon endothelial cells|colon glandular cells|duodenum glandular cells|endometrium glandular cells|epididymis glandular cells|esophagus squamous epithelial cells|fallopian tube glandular cells|gallbladder glandular c…	Receptor for somatostatin with higher affinity for somatostatin-14 than -28. This receptor is coupled via pertussis toxin sensitive G proteins to inhibition of adenylyl cyclase. In addition it stimulates phosphotyrosine phosphatase and Na(+)/H(+) exchanger via pertussis toxin insensitive G proteins.	Belongs to the G-protein coupled receptor 1 family.	P30872|	SSR1_HUMAN
P31391	SSTR4	G-Protein Coupled Receptor	Family 1	Somatostatin receptor type 4	-	-	7	1.38e-06	-	Status Epilepticus|	-	Receptor for somatostatin-14. The activity of this receptor is mediated by G proteins which inhibits adenylyl cyclase. It is functionally coupled not only to inhibition of adenylate cyclase, but also to activation of both arachidonate release and mitogen-activated protein (MAP) kinase cascade. Mediates antiproliferative action of somatostatin in tumor cells.	Belongs to the G-protein coupled receptor 1 family.	P31391|Q17RM1|Q17RM3|Q9UIY1|	SSR4_HUMAN
P35367	HRH1	G-Protein Coupled Receptor	Family 1	Histamine H1 receptor	27	-	7	0.00099502	-	Atherosclerosis|Rhinitis|Schizophrenia|Substance Withdrawal Syndrome|Allergic rhinitis (disorder)|	adrenal gland glandular cells|appendix glandular cells|bronchus respiratory epithelial cells|cerebral cortex endothelial cells|colon endothelial cells|colon glandular cells|colon peripheral nerve/ganglion|duodenum glandular cells|epididymis glandular cells|esophagus squamous epithelial cells|gallbladder glandular cells|heart muscle myocytes|kidney cells in glomeruli|kidney cells in tubules|lung m…	In peripheral tissues, the H1 subclass of histamine receptors mediates the contraction of smooth muscles, increase in capillary permeability due to contraction of terminal venules, and catecholamine release from adrenal medulla, as well as mediating neurotransmission in the central nervous system.	Belongs to the G-protein coupled receptor 1 family.	P35367|A8K047|Q6P9E5|	HRH1_HUMAN
P43116	PTGER2	G-Protein Coupled Receptor	Family 1	Prostaglandin E2 receptor EP2 subtype	-	-	7	0.00041229	-	Endometriosis|Liver Cirrhosis, Experimental|Asthma, Aspirin-Induced|Asthma, Nasal Polyps, And Aspirin Intolerance|	-	Receptor for prostaglandin E2 (PGE2). The activity of this receptor is mediated by G(s) proteins that stimulate adenylate cyclase. The subsequent raise in intracellular cAMP is responsible for the relaxing effect of this receptor on smooth muscle.	Belongs to the G-protein coupled receptor 1 family.	P43116|D3DSC0|Q52LG8|	PE2R2_HUMAN
P46093	GPR4	G-Protein Coupled Receptor	Family 1	G-protein coupled receptor 4	54	-	7	4.4e-07	-	-	adrenal gland glandular cells|appendix glandular cells|appendix lymphoid tissue|bone marrow hematopoietic cells|breast glandular cells|breast myoepithelial cells|bronchus respiratory epithelial cells|caudate neuronal cells|cerebellum cells in granular layer|cerebellum cells in molecular layer|cerebral cortex endothelial cells|cerebral cortex neuronal cells|cerebral cortex neuropil|cervix, uterine…	Proton-sensing receptor coupled to several G-proteins, including G(s), G(13) and G(q)/G(11) proteins, leading to cAMP production.	Belongs to the G-protein coupled receptor 1 family.	P46093|A8K3T3|B0M0K1|Q6NWM4|	GPR4_HUMAN
P49682	CXCR3	G-Protein Coupled Receptor	Family 1	C-X-C chemokine receptor type 3	11	-	7	1.824e-05	-	Alopecia Areata|Dermatitis, Atopic|Contact Dermatitis|Glomerulonephritis|Pneumonia|	bone marrow hematopoietic cells|bronchus respiratory epithelial cells|lung macrophages|lung pneumocytes|lymph node non-germinal center cells|skeletal muscle myocytes|spleen cells in red pulp|spleen cells in white pulp|tonsil germinal center cells|tonsil non-germinal center cells|tonsil squamous epithelial cells|	Isoform 1: Receptor for the C-X-C chemokine CXCL9, CXCL10 and CXCL11 and mediates the proliferation, survival and angiogenic activity of human mesangial cells (HMC) through a heterotrimeric G-protein signaling pathway (PubMed:12782716). Binds to CCL21. Probably promotes cell chemotaxis response.	Belongs to the G-protein coupled receptor 1 family.	P49682|B2R982|O15185|Q7Z710|Q9P2T4|Q9P2T5|	CXCR3_HUMAN
P51686	CCR9	G-Protein Coupled Receptor	Family 1	C-C chemokine receptor type 9	5	-	7	0.00017182	-	Pneumonia|Status Epilepticus|	appendix lymphoid tissue|lymph node germinal center cells|spleen cells in red pulp|tonsil germinal center cells|tonsil non-germinal center cells|	Receptor for chemokine SCYA25/TECK. Subsequently transduces a signal by increasing the intracellular calcium ions level.	Belongs to the G-protein coupled receptor 1 family.	P51686|Q4VBM3|Q549E0|Q9UQQ6|	CCR9_HUMAN
Q13304	GPR17	G-Protein Coupled Receptor	Family 1	Uracil nucleotide/cysteinyl leukotriene receptor	9	-	7	1.258e-05	-	Brain Infarction|	bone marrow hematopoietic cells|caudate glial cells|cerebellum cells in granular layer|cerebral cortex glial cells|cerebral cortex neuropil|hippocampus glial cells|lymph node non-germinal center cells|spleen cells in red pulp|tonsil non-germinal center cells|	Dual specificity receptor for uracil nucleotides and cysteinyl leukotrienes (CysLTs). Signals through G(i) and inhibition of adenylyl cyclase. May mediate brain damage by nucleotides and CysLTs following ischemia.	Belongs to the G-protein coupled receptor 1 family.	Q13304|A8K9L0|B2R9X0|Q8N5S7|Q9UDZ6|Q9UE21|	GPR17_HUMAN
Q8TDS5	OXER1	G-Protein Coupled Receptor	Family 1	Oxoeicosanoid receptor 1	69	-	7	0.00017514	-	-	adrenal gland glandular cells|appendix glandular cells|bone marrow hematopoietic cells|breast glandular cells|breast myoepithelial cells|bronchus respiratory epithelial cells|caudate glial cells|caudate neuronal cells|cerebellum Purkinje cells|cerebellum cells in granular layer|cerebellum cells in molecular layer|cerebral cortex endothelial cells|cerebral cortex glial cells|cerebral cortex neuron…	Receptor for eicosanoids and polyunsaturated fatty acids such as 5-oxo-6E,8Z,11Z,14Z-eicosatetraenoic acid (5-OXO-ETE), 5(S)-hydroperoxy-6E,8Z,11Z,14Z-eicosatetraenoic acid (5(S)-HPETE) and arachidonic acid. Seems to be coupled to the G(i)/G(o), families of heteromeric G proteins.	Belongs to the G-protein coupled receptor 1 family.	Q8TDS5|Q86WP7|Q8NGW4|	OXER1_HUMAN
Q9GZQ6	NPFFR1	G-Protein Coupled Receptor	Family 1	Neuropeptide FF receptor 1	-	-	7	9.128e-05	-	-	-	Receptor for NPAF (A-18-F-amide) and NPFF (F-8-F-amide) neuropeptides, also known as morphine-modulating peptides. Can also be activated by a variety of naturally occurring or synthetic FMRF-amide like ligands. This receptor mediates its action by association with G proteins that activate a phosphatidylinositol- calcium second messenger system.	Belongs to the G-protein coupled receptor 1 family.	Q9GZQ6|A2RRF0|Q8NGR0|Q96RN3|	NPFF1_HUMAN
Q9Y5N1	HRH3	G-Protein Coupled Receptor	Family 1	Histamine H3 receptor	-	-	7	4.686e-05	-	Amnesia|Memory Disorders|	-	The H3 subclass of histamine receptors could mediate the histamine signals in CNS and peripheral nervous system. Signals through the inhibition of adenylate cyclase and displays high constitutive activity (spontaneous activity in the absence of agonist). Agonist stimulation of isoform 3 neither modified adenylate cyclase activity nor induced intracellular calcium mobilization.	Belongs to the G-protein coupled receptor 1 family.	Q9Y5N1|Q4QRI7|Q9GZX2|Q9H4K8|	HRH3_HUMAN
P47804	RGR	G-Protein Coupled Receptor	Family 1	RPE-retinal G protein-coupled receptor	-	10	6	0.00016559	-	Glaucoma|Conductive hearing loss|Sensorineural Hearing Loss (disorder)|Hyperinsulinism|Hypogonadism|Keratoconus|Mental Retardation|Nystagmus|Obesity|Optic Atrophy|Retinitis Pigmentosa|Low Vision|Cataract|Congenital hypoplasia of penis|Blindness, Legal|Mental deficiency|RETINITIS PIGMENTOSA 44|Abnormality of the retinal vasculature|	-	Receptor for all-trans- and 11-cis-retinal. Binds preferentially to the former and may catalyze the isomerization of the chromophore by a retinochrome-like mechanism.	Belongs to the G-protein coupled receptor 1 family. Opsin subfamily.	P47804|A6NKK7|Q96FC5|	RGR_HUMAN
O00574	CXCR6	G-Protein Coupled Receptor	Family 1	C-X-C chemokine receptor type 6	-	-	6	8.9e-07	-	-	-	Receptor for the C-X-C chemokine CXCL16. Used as a coreceptor by SIVs and by strains of HIV-2 and m-tropic HIV-1.	Belongs to the G-protein coupled receptor 1 family.	O00574|O00575|Q9HCA5|	CXCR6_HUMAN
O00590	ACKR2	G-Protein Coupled Receptor	Family 1	Atypical chemokine receptor 2	22	-	6	8.9e-07	-	-	bone marrow hematopoietic cells|breast glandular cells|breast myoepithelial cells|bronchus respiratory epithelial cells|colon glandular cells|duodenum glandular cells|endometrium glandular cells|fallopian tube glandular cells|kidney cells in tubules|lung macrophages|nasopharynx respiratory epithelial cells|placenta decidual cells|placenta trophoblastic cells|rectum glandular cells|skin Langerhans…	Atypical chemokine receptor that controls chemokine levels and localization via high-affinity chemokine binding that is uncoupled from classic ligand-driven signal transduction cascades, resulting instead in chemokine sequestration, degradation, or transcytosis. Also known as interceptor (internalizing receptor) or chemokine-scavenging receptor or chemokine decoy receptor. Acts as a receptor for …	Belongs to the G-protein coupled receptor 1 family. Atypical chemokine receptor subfamily.	O00590|B2R8Y8|O00537|Q53YA1|Q86UN9|Q96A02|	ACKR2_HUMAN
O43614	HCRTR2	G-Protein Coupled Receptor	Family 1	Orexin receptor type 2	2	-	6	0.00020801	-	Narcolepsy|	cerebellum cells in granular layer|cerebral cortex neuropil|	Nonselective, high-affinity receptor for both orexin-A and orexin-B neuropeptides (PubMed:9491897, PubMed:26950369). Triggers an increase in cytoplasmic Ca(2+) levels in response to orexin-A binding (PubMed:9491897, PubMed:26950369).	Belongs to the G-protein coupled receptor 1 family.	O43614|Q5VTM0|	OX2R_HUMAN
P21452	TACR2	G-Protein Coupled Receptor	Family 1	Substance-K receptor	-	-	6	1.825e-05	-	-	-	This is a receptor for the tachykinin neuropeptide substance K (neurokinin A). It is associated with G proteins that activate a phosphatidylinositol-calcium second messenger system. The rank order of affinity of this receptor to tachykinins is: substance K > neuromedin-K > substance P.	Belongs to the G-protein coupled receptor 1 family.	P21452|A8K7I1|Q4QRI5|Q8NGQ8|Q9UDE6|Q9UDE7|	NK2R_HUMAN
P25089	FPR3	G-Protein Coupled Receptor	Family 1	N-formyl peptide receptor 3	-	-	6	8.9e-07	-	-	-	Low affinity receptor for N-formyl-methionyl peptides, which are powerful neutrophils chemotactic factors. Binding of FMLP to the receptor causes activation of neutrophils. This response is mediated via a G-protein that activates a phosphatidylinositol-calcium second messenger system.	Belongs to the G-protein coupled receptor 1 family.	P25089|	FPR3_HUMAN
P29371	TACR3	G-Protein Coupled Receptor	Family 1	Neuromedin-K receptor	-	-	6	1.825e-05	-	Alcoholic Intoxication, Chronic|Anxiety|Cryptorchidism|Depressive disorder|Gynecomastia|Hypogonadism|Osteopenia|Osteoporosis|Schizophrenia|Testicular hypogonadism|Kallmann Syndrome|Primary physiologic amenorrhea|Secondary physiologic amenorrhea|Erectile dysfunction|Congenital hypoplasia of breast|Infantile uterus|Congenital hypoplasia of penis|Female hypogonadism syndrome|Hypogonadotropic hypogon…	-	This is a receptor for the tachykinin neuropeptide neuromedin-K (neurokinin B). It is associated with G proteins that activate a phosphatidylinositol-calcium second messenger system. The rank order of affinity of this receptor to tachykinins is: neuromedin-K > substance K > substance P.	Belongs to the G-protein coupled receptor 1 family.	P29371|Q0P510|	NK3R_HUMAN
P30939	HTR1F	G-Protein Coupled Receptor	Family 1	5-hydroxytryptamine receptor 1F	-	-	6	3.74e-06	-	Schizophrenia|	-	G-protein coupled receptor for 5-hydroxytryptamine (serotonin). Also functions as a receptor for various alkaloids and psychoactive substances. Ligand binding causes a conformation change that triggers signaling via guanine nucleotide-binding proteins (G proteins) and modulates the activity of down-stream effectors, such as adenylate cyclase. Signaling inhibits adenylate cyclase activity.	Belongs to the G-protein coupled receptor 1 family.	P30939|	5HT1F_HUMAN
P35408	PTGER4	G-Protein Coupled Receptor	Family 1	Prostaglandin E2 receptor EP4 subtype	73	-	6	7.693e-05	-	Endometriosis|Ovarian Cysts|Ankylosing spondylitis|Chloracne|Arthritis, Experimental|	adrenal gland glandular cells|appendix glandular cells|appendix lymphoid tissue|bone marrow hematopoietic cells|breast glandular cells|breast myoepithelial cells|bronchus respiratory epithelial cells|caudate glial cells|cerebellum Purkinje cells|cerebellum cells in granular layer|cerebellum cells in molecular layer|cerebral cortex endothelial cells|cerebral cortex glial cells|cerebral cortex neur…	Receptor for prostaglandin E2 (PGE2). The activity of this receptor is mediated by G(s) proteins that stimulate adenylate cyclase. Has a relaxing effect on smooth muscle. May play an important role in regulating renal hemodynamics, intestinal epithelial transport, adrenal aldosterone secretion, and uterine function.	Belongs to the G-protein coupled receptor 1 family.	P35408|Q3MJ87|	PE2R4_HUMAN
P41968	MC3R	G-Protein Coupled Receptor	Family 1	Melanocortin receptor 3	-	-	6	0.00011948	-	Obesity|MYCOBACTERIUM TUBERCULOSIS, SUSCEPTIBILITY TO (finding)|	-	Receptor for MSH (alpha, beta and gamma) and ACTH. This receptor is mediated by G proteins which activate adenylate cyclase. Required for expression of anticipatory patterns of activity and wakefulness during periods of limited nutrient availability and for the normal regulation of circadian clock activity in the brain.	Belongs to the G-protein coupled receptor 1 family.	P41968|Q4KN27|Q9H517|	MC3R_HUMAN
P46095	GPR6	G-Protein Coupled Receptor	Family 1	G-protein coupled receptor 6	-	-	6	1.677e-05	-	-	-	Orphan receptor with constitutive G(s) signaling activity that activate cyclic AMP. Promotes neurite outgrowth and blocks myelin inhibition in neurons (By similarity).	Belongs to the G-protein coupled receptor 1 family.	P46095|B4DHS9|J3KQR3|Q17RJ7|Q5SYL0|	GPR6_HUMAN
P47901	AVPR1B	G-Protein Coupled Receptor	Family 1	Vasopressin V1b receptor	2	-	6	4.009e-05	-	Bipolar Disorder|	pituitary gland cells in anterior |skeletal muscle myocytes|	Receptor for arginine vasopressin. The activity of this receptor is mediated by G proteins which activate a phosphatidyl- inositol-calcium second messenger system.	Belongs to the G-protein coupled receptor 1 family. Vasopressin/oxytocin receptor subfamily.	P47901|B0M0J6|Q5TZ00|	V1BR_HUMAN
P50391	NPY4R	G-Protein Coupled Receptor	Family 1	Neuropeptide Y receptor type 4	59	-	6	6.131e-05	-	-	adrenal gland glandular cells|appendix glandular cells|bone marrow hematopoietic cells|breast glandular cells|breast myoepithelial cells|bronchus respiratory epithelial cells|caudate glial cells|caudate neuronal cells|cerebellum Purkinje cells|cerebellum cells in granular layer|cerebellum cells in molecular layer|cerebral cortex glial cells|cerebral cortex neuronal cells|cerebral cortex neuropil|…	Receptor for neuropeptide Y and peptide YY. The rank order of affinity of this receptor for pancreatic polypeptides is PP, PP (2-36) and [Ile-31, Gln-34] PP > [Pro-34] PYY > PYY and [Leu-31, Pro-34] NPY > NPY > PYY (3-36) and NPY (2-36) > PP (13- 36) > PP (31-36) > NPY free acid.	Belongs to the G-protein coupled receptor 1 family.	P50391|Q13456|Q5ISU3|Q5T2X9|Q6FH06|	NPY4R_HUMAN
P51685	CCR8	G-Protein Coupled Receptor	Family 1	C-C chemokine receptor type 8	2	-	6	8.9e-07	-	Status Epilepticus|	thymus cortical cells|thymus medullary cells|	Receptor for the chemokine CCL1/SCYA1/I-309. May regulate monocyte chemotaxis and thymic cell line apoptosis. Alternative coreceptor with CD4 for HIV-1 infection.	Belongs to the G-protein coupled receptor 1 family.	P51685|B2RC64|Q3KNQ8|Q3KNR3|Q9BYX5|	CCR8_HUMAN
Q7Z5H4	VN1R5	G-Protein Coupled Receptor	Family 1	Vomeronasal type-1 receptor 5	-	-	6	1.726e-05	-	-	-	Putative pheromone receptor.	Belongs to the G-protein coupled receptor 1 family.	Q7Z5H4|A0AVG1|Q8NEU5|Q8TDU3|	VN1R5_HUMAN
Q8TDU9	RXFP4	G-Protein Coupled Receptor	Family 1	Relaxin-3 receptor 2	-	-	6	4.367e-05	-	-	-	High affinity receptor for INSL5. Also acts as receptor for RLN3/relaxin-3, as well as bradykinin and kallidin. Binding of the ligand inhibit cAMP accumulation.	Belongs to the G-protein coupled receptor 1 family.	Q8TDU9|B0M0L4|Q3MJB1|Q8NGZ8|	RL3R2_HUMAN
Q8WXD0	RXFP2	G-Protein Coupled Receptor	Family 1	Relaxin receptor 2	-	-	6	8.9e-07	-	Cryptorchidism|	-	Receptor for relaxin. The activity of this receptor is mediated by G proteins leading to stimulation of adenylate cyclase and an increase of cAMP. May also be a receptor for Leydig insulin-like peptide (INSL3).	Belongs to the G-protein coupled receptor 1 family.	Q8WXD0|B1ALE9|Q3KU23|	RXFP2_HUMAN
Q9H1C0	LPAR5	G-Protein Coupled Receptor	Family 1	Lysophosphatidic acid receptor 5	65	-	6	1.825e-05	-	-	adrenal gland glandular cells|appendix glandular cells|appendix lymphoid tissue|bone marrow hematopoietic cells|breast glandular cells|breast myoepithelial cells|bronchus respiratory epithelial cells|caudate glial cells|caudate neuronal cells|cerebral cortex endothelial cells|cerebral cortex glial cells|cerebral cortex neuronal cells|cerebral cortex neuropil|cervix, uterine glandular cells|colon …	Receptor for lysophosphatidic acid (LPA), a mediator of diverse cellular activities.	Belongs to the G-protein coupled receptor 1 family.	Q9H1C0|	LPAR5_HUMAN
Q9BPV8	P2RY13	G-Protein Coupled Receptor	Family 1	P2Y purinoceptor 13	7	7	5	0	-	-	bone marrow hematopoietic cells|cerebral cortex neuronal cells|cerebral cortex neuropil|hippocampus neuronal cells|lung macrophages|lymph node non-germinal center cells|spleen cells in red pulp|	Receptor for ADP. Coupled to G(i)-proteins. May play a role in hematopoiesis and the immune system.	Belongs to the G-protein coupled receptor 1 family.	Q9BPV8|B2R827|Q05C50|Q6DKN4|Q8IUT5|Q8TDU7|Q9BY61|	P2Y13_HUMAN
O00421	CCRL2	G-Protein Coupled Receptor	Family 1	C-C chemokine receptor-like 2	41	-	5	8.9e-07	-	Arsenic Poisoning|	adrenal gland glandular cells|appendix glandular cells|bone marrow hematopoietic cells|breast glandular cells|bronchus respiratory epithelial cells|cerebral cortex endothelial cells|cerebral cortex glial cells|cervix, uterine glandular cells|colon glandular cells|duodenum glandular cells|endometrium glandular cells|esophagus squamous epithelial cells|fallopian tube glandular cells|gallbladder gla…	Receptor for CCL19 and chemerin/RARRES2. Does not appear to be a signaling receptor, but may have a role in modulating chemokine-triggered immune responses by capturing and internalizing CCL19 or by presenting RARRES2 ligand to CMKLR1, a functional signaling receptors. Plays a critical role for the development of Th2 responses.	Belongs to the G-protein coupled receptor 1 family.	O00421|B4DKQ8|O75307|Q4VBB0|Q6IPX0|Q7KYQ9|Q96KP5|Q9UPG0|	CCRL2_HUMAN
O60755	GALR3	G-Protein Coupled Receptor	Family 1	Galanin receptor type 3	-	-	5	8.9e-07	-	Alcoholic Intoxication, Chronic|Alcohol abuse|	-	Receptor for the hormone galanin (PubMed:25691535). Receptor for the hormone spexin-1 (PubMed:24517231).	Belongs to the G-protein coupled receptor 1 family.	O60755|Q53YJ4|	GALR3_HUMAN
P04201	MAS1	G-Protein Coupled Receptor	Family 1	Proto-oncogene Mas	-	-	5	2.276e-05	-	-	-	Receptor for angiotensin 1-7 (By similarity). Acts specifically as a functional antagonist of AGTR1 (angiotensin-2 type 1 receptor), although it up-regulates AGTR1 receptor levels. Positive regulation of AGTR1 levels occurs through activation of the G-proteins GNA11 and GNAQ, and stimulation of the protein kinase C signaling cascade. The antagonist effect on AGTR1 function is probably due to AGTR…	Belongs to the G-protein coupled receptor 1 family.	P04201|E1P5B3|Q2TBC9|Q6FG47|	MAS_HUMAN
P34981	TRHR	G-Protein Coupled Receptor	Family 1	Thyrotropin-releasing hormone receptor	1	-	5	3.847e-05	-	Hypothyroidism|Macroglossia|Global developmental delay|Thyroid Hormone Resistance Syndrome|	pituitary gland cells in anterior |	Receptor for thyrotropin-releasing hormone. This receptor is mediated by G proteins which activate a phosphatidylinositol-calcium second messenger system.	Belongs to the G-protein coupled receptor 1 family.	P34981|Q2M339|	TRFR_HUMAN
P46094	XCR1	G-Protein Coupled Receptor	Family 1	Chemokine XC receptor 1	-	-	5	8.9e-07	-	-	-	Receptor for chemokines SCYC1 and SCYC2. Subsequently transduces a signal by increasing the intracellular calcium ions level. Receptor for XCL1/Lymphotactin.	Belongs to the G-protein coupled receptor 1 family.	P46094|	XCR1_HUMAN
P46663	BDKRB1	G-Protein Coupled Receptor	Family 1	B1 bradykinin receptor	62	-	5	5.17e-05	-	Diabetes Mellitus, Experimental|Epilepsy, Temporal Lobe|	adrenal gland glandular cells|appendix glandular cells|appendix lymphoid tissue|breast glandular cells|bronchus respiratory epithelial cells|caudate glial cells|caudate neuronal cells|cerebellum Purkinje cells|cerebellum cells in granular layer|cerebellum cells in molecular layer|cerebral cortex endothelial cells|cerebral cortex glial cells|cerebral cortex neuronal cells|cerebral cortex neuropil|…	This is a receptor for bradykinin. Could be a factor in chronic pain and inflammation.	Belongs to the G-protein coupled receptor 1 family. Bradykinin receptor subfamily. BDKRB1 sub-subfamily.	P46663|A8K7F5|Q546S7|Q8N0Y8|	BKRB1_HUMAN
P47898	HTR5A	G-Protein Coupled Receptor	Family 1	5-hydroxytryptamine receptor 5A	32	-	5	8.9e-07	-	Autistic Disorder|Bipolar Disorder|Schizophrenia|Nonorganic psychosis|	adrenal gland glandular cells|appendix glandular cells|breast adipocytes|breast glandular cells|breast myoepithelial cells|bronchus respiratory epithelial cells|caudate neuronal cells|cerebral cortex endothelial cells|colon endothelial cells|colon glandular cells|duodenum glandular cells|endometrium glandular cells|epididymis glandular cells|esophagus squamous epithelial cells|fallopian tube glan…	This is one of the several different receptors for 5- hydroxytryptamine (serotonin), a biogenic hormone that functions as a neurotransmitter, a hormone, and a mitogen. The activity of this receptor is mediated by G proteins.	Belongs to the G-protein coupled receptor 1 family.	P47898|Q2M2D2|	5HT5A_HUMAN
P49019	HCAR3	G-Protein Coupled Receptor	Family 1	Hydroxycarboxylic acid receptor 3	35	-	5	8.9e-07	-	Bipolar Disorder|Squamous cell carcinoma|Schizophrenia|	appendix glandular cells|bone marrow hematopoietic cells|breast glandular cells|breast myoepithelial cells|bronchus respiratory epithelial cells|caudate neuronal cells|cerebral cortex endothelial cells|cerebral cortex neuronal cells|cerebral cortex neuropil|cervix, uterine squamous epithelial cells|colon glandular cells|duodenum glandular cells|epididymis glandular cells|gallbladder glandular cel…	Receptor for 3-OH-octanoid acid mediates a negative feedback regulation of adipocyte lipolysis to counteract prolipolytic influences under conditions of physiological or pathological increases in beta-oxidation rates. Acts as a low affinity receptor for nicotinic acid. This pharmacological effect requires nicotinic acid doses that are much higher than those provided by a normal diet.	Belongs to the G-protein coupled receptor 1 family.	P49019|A8K4G5|B2R830|E9PI97|Q8NGE4|	HCAR3_HUMAN
P49238	CX3CR1	G-Protein Coupled Receptor	Family 1	CX3C chemokine receptor 1	36	-	5	8.9e-07	-	Coronary heart disease|Chloracne|Macular Degeneration, Age-Related, 1|	adrenal gland glandular cells|appendix glandular cells|bone marrow hematopoietic cells|breast glandular cells|caudate glial cells|caudate neuronal cells|cerebral cortex endothelial cells|cerebral cortex glial cells|cerebral cortex neuropil|colon glandular cells|duodenum glandular cells|esophagus squamous epithelial cells|fallopian tube glandular cells|gallbladder glandular cells|heart muscle myoc…	Receptor for the CX3C chemokine fractalkine (CX3CL1); binds to CX3CL1 and mediates both its adhesive and migratory functions (PubMed:9390561, PubMed:23125415). Acts as coreceptor with CD4 for HIV-1 virus envelope protein (in vitro) (PubMed:9726990). Isoform 2 and isoform 3 seem to be more potent HIV-1 coreceptors than isoform 1 (PubMed:14607932).	Belongs to the G-protein coupled receptor 1 family.	P49238|A0N0N6|B2R5Z4|J3KP17|	CX3C1_HUMAN
P51684	CCR6	G-Protein Coupled Receptor	Family 1	C-C chemokine receptor type 6	8	-	5	8.9e-07	-	Arthritis|Rheumatoid Arthritis|Ulcerative Colitis|Contracture|Contracture of joint|Dental caries|Gastroesophageal reflux disease|Pneumonia|Pulmonary Fibrosis|Vitiligo|Xerostomia|Anhedonia|CREST Syndrome|Flexion contracture|Scleroderma, Limited|Diffuse Scleroderma|Flexion contractures of joints|Narrow foramen obturatorium|Mucosal telangiectasiae|	appendix lymphoid tissue|bone marrow hematopoietic cells|lymph node germinal center cells|lymph node non-germinal center cells|spleen cells in red pulp|spleen cells in white pulp|tonsil germinal center cells|tonsil non-germinal center cells|	Receptor for the C-C type chemokine CCL20 (PubMed:9169459). Binds to CCL20 and subsequently transduces a signal by increasing the intracellular calcium ion levels (PubMed:20068036). Although CCL20 is its major ligand it can also act as a receptor for non-chemokine ligands such as beta-defensins (PubMed:25585877). Binds to defensin DEFB1 leading to increase in intracellular calcium ions and cAMP l…	Belongs to the G-protein coupled receptor 1 family.	P51684|E1P5C6|P78553|Q92846|	CCR6_HUMAN
Q01726	MC1R	G-Protein Coupled Receptor	Family 1	Melanocyte-stimulating hormone receptor	-	-	5	9.57e-06	-	Albinism|Basal cell carcinoma|Mental Depression|Depressive disorder|melanoma|Nevus|Melanocytic nevus|Nystagmus|Strabismus|Low Vision|Vitiligo|Xerosis|Oculocutaneous albinism type 2|Congenital melanocytic nevus|Hereditary Melanoma|MELANOMA, CUTANEOUS MALIGNANT, 1|GIANT PIGMENTED HAIRY NEVUS|MELANOMA, CUTANEOUS MALIGNANT, SUSCEPTIBILITY TO, 5|Abnormality of the lymphatic system|	-	Receptor for MSH (alpha, beta and gamma) and ACTH. The activity of this receptor is mediated by G proteins which activate adenylate cyclase.	Belongs to the G-protein coupled receptor 1 family.	Q01726|Q66K38|Q6UR93|Q8WWX6|Q8WWX7|Q96I33|Q96RU4|Q9UBF7|Q9UN58|Q9UN59|Q9UN60|Q9UN61|Q9UN62|	MSHR_HUMAN
Q7Z5H5	VN1R4	G-Protein Coupled Receptor	Family 1	Vomeronasal type-1 receptor 4	-	-	5	8.9e-07	-	-	-	Putative pheromone receptor.	Belongs to the G-protein coupled receptor 1 family.	Q7Z5H5|Q2M3E2|Q7Z5H6|Q7Z5H7|Q8TDU2|	VN1R4_HUMAN
Q8N6U8	GPR161	G-Protein Coupled Receptor	Family 1	G-protein coupled receptor 161	74	-	5	0.00034309	-	Hypoglycemia|Hypothyroidism|Congenital hypoplasia of penis|Pediatric failure to thrive|Pituitary stalk interruption syndrome|	adrenal gland glandular cells|appendix glandular cells|appendix lymphoid tissue|bone marrow hematopoietic cells|breast glandular cells|breast myoepithelial cells|bronchus respiratory epithelial cells|caudate glial cells|caudate neuronal cells|cerebellum Purkinje cells|cerebellum cells in granular layer|cerebellum cells in molecular layer|cerebral cortex endothelial cells|cerebral cortex glial cel…	Key negative regulator of Shh signaling, which promotes the processing of GLI3 into GLI3R during neural tube development. Recruited by TULP3 and the IFT-A complex to primary cilia and acts as a regulator of the PKA-dependent basal repression machinery in Shh signaling by increasing cAMP levels, leading to promote the PKA-dependent processing of GLI3 into GLI3R and repress the Shh signaling. In pr…	Belongs to the G-protein coupled receptor 1 family.	Q8N6U8|B3KV34|B7Z5D7|B7Z5E8|B7Z5Z6|F5GXD6|F5H6J7|O75963|Q5TGK0|Q5TGK1|Q5TGK2|	GP161_HUMAN
Q8NFZ6	VN1R2	G-Protein Coupled Receptor	Family 1	Vomeronasal type-1 receptor 2	-	-	5	8.9e-07	-	-	-	Putative pheromone receptor.	Belongs to the G-protein coupled receptor 1 family.	Q8NFZ6|A1L411|Q8TDU4|	VN1R2_HUMAN
Q8TDS4	HCAR2	G-Protein Coupled Receptor	Family 1	Hydroxycarboxylic acid receptor 2	35	-	5	8.9e-07	-	Bipolar Disorder|Squamous cell carcinoma|Psoriasis|Schizophrenia|	appendix glandular cells|bone marrow hematopoietic cells|breast glandular cells|breast myoepithelial cells|bronchus respiratory epithelial cells|caudate neuronal cells|cerebral cortex endothelial cells|cerebral cortex neuronal cells|cerebral cortex neuropil|cervix, uterine squamous epithelial cells|colon glandular cells|duodenum glandular cells|epididymis glandular cells|gallbladder glandular cel…	Acts as a high affinity receptor for both nicotinic acid (also known as niacin) and (D)-beta-hydroxybutyrate and mediates increased adiponectin secretion and decreased lipolysis through G(i)-protein-mediated inhibition of adenylyl cyclase. This pharmacological effect requires nicotinic acid doses that are much higher than those provided by a normal diet. Mediates nicotinic acid-induced apoptosis …	Belongs to the G-protein coupled receptor 1 family.	Q8TDS4|A0PJL5|A7LGG3|	HCAR2_HUMAN
Q8TDU5	VN1R17P	G-Protein Coupled Receptor	Family 1	Putative vomeronasal receptor-like protein 4	-	-	5	8.9e-07	-	-	-	Putative pheromone receptor.	Belongs to the G-protein coupled receptor 1 family.	Q8TDU5|	VNRL4_HUMAN
Q969F8	KISS1R	G-Protein Coupled Receptor	Family 1	KiSS-1 receptor	-	-	5	8.25e-05	-	Kallmann Syndrome|Idiopathic hypogonadotropic hypogonadism|Precocious Puberty, Central|Kallmann Syndrome 2 (disorder)|HYPOGONADOTROPIC HYPOGONADISM 8 WITH OR WITHOUT ANOSMIA|PRECOCIOUS PUBERTY, CENTRAL, 1|	-	Receptor for metastin (kisspeptin-54 or kp-54), a C- terminally amidated peptide of KiSS1. KiSS1 is a metastasis suppressor protein that suppresses metastases in malignant melanomas and in some breast carcinomas without affecting tumorigenicity. The metastasis suppressor properties may be mediated in part by cell cycle arrest and induction of apoptosis in malignant cells. The receptor is essentia…	Belongs to the G-protein coupled receptor 1 family.	Q969F8|A5D8U2|B2RTV1|Q96QG0|	KISSR_HUMAN
Q969V1	MCHR2	G-Protein Coupled Receptor	Family 1	Melanin-concentrating hormone receptor 2	-	-	5	8.9e-07	-	Bipolar Disorder|Schizophrenia|	-	Receptor for melanin-concentrating hormone, coupled to G proteins that activate phosphoinositide hydrolysis.	Belongs to the G-protein coupled receptor 1 family.	Q969V1|B3KVW4|E1P5D7|Q5VTV7|Q6Q377|Q9BXA8|	MCHR2_HUMAN
Q96P65	QRFPR	G-Protein Coupled Receptor	Family 1	Pyroglutamylated RFamide peptide receptor	-	-	5	5.717e-05	-	-	-	Receptor for the orexigenic neuropeptide QRFP. The activity of this receptor is mediated by G proteins that modulate adenylate cyclase activity and intracellular calcium levels.	Belongs to the G-protein coupled receptor 1 family.	Q96P65|	QRFPR_HUMAN
Q99527	GPER1	G-Protein Coupled Receptor	Family 1	G-protein coupled estrogen receptor 1	60	-	5	8.9e-07	-	-	adrenal gland glandular cells|appendix glandular cells|appendix lymphoid tissue|bone marrow hematopoietic cells|breast myoepithelial cells|bronchus respiratory epithelial cells|caudate neuronal cells|cerebellum cells in granular layer|cerebral cortex endothelial cells|cerebral cortex glial cells|cerebral cortex neuronal cells|cerebral cortex neuropil|colon endothelial cells|colon glandular cells|…	G-protein coupled estrogen receptor that binds to 17- beta-estradiol (E2) with high affinity, leading to rapid and transient activation of numerous intracellular signaling pathways. Stimulates cAMP production, calcium mobilization and tyrosine kinase Src inducing the release of heparin-bound epidermal growth factor (HB-EGF) and subsequent transactivation of the epidermal growth factor receptor (E…	Belongs to the G-protein coupled receptor 1 family.	Q99527|A8K6C5|B5BUJ1|O00143|O43494|Q13631|Q6FHL1|Q96F42|Q99981|	GPER1_HUMAN
Q99788	CMKLR1	G-Protein Coupled Receptor	Family 1	Chemokine-like receptor 1	18	-	5	8.9e-07	-	Mental Depression|Depressive disorder|	adrenal gland glandular cells|caudate glial cells|caudate neuronal cells|cerebellum Purkinje cells|cerebral cortex neuropil|duodenum glandular cells|gallbladder glandular cells|heart muscle myocytes|hippocampus glial cells|kidney cells in tubules|liver hepatocytes|pancreas exocrine glandular cells|parathyroid gland glandular cells|salivary gland glandular cells|small intestine glandular cells|sto…	Receptor for the chemoattractant adipokine chemerin/RARRES2 and for the omega-3 fatty acid derived molecule resolvin E1. Interaction with RARRES2 induces activation of intracellular signaling molecules, such as SKY, MAPK1/3 (ERK1/2), MAPK14/P38MAPK and PI3K leading to multifunctional effects, like, reduction of immune responses, enhancing of adipogenesis and angionesis. Resolvin E1 down-regulates…	Belongs to the G-protein coupled receptor 1 family.	Q99788|A8K6Y5|O75748|Q3KP37|Q5U0H0|Q99789|	CML1_HUMAN
Q9BXC0	HCAR1	G-Protein Coupled Receptor	Family 1	Hydroxycarboxylic acid receptor 1	-	-	5	8.9e-07	-	-	-	Acts as a receptor for L-lactate and mediates its anti- lipolytic effect through a G(i)-protein-mediated pathway.	Belongs to the G-protein coupled receptor 1 family.	Q9BXC0|B2R9X4|Q3Y5J3|Q4VBN1|Q6NXU5|	HCAR1_HUMAN
Q9BXE9	VN1R3	G-Protein Coupled Receptor	Family 1	Vomeronasal type-1 receptor 3	-	-	5	8.9e-07	-	-	-	Putative pheromone receptor.	Belongs to the G-protein coupled receptor 1 family.	Q9BXE9|	VN1R3_HUMAN
Q9GZP7	VN1R1	G-Protein Coupled Receptor	Family 1	Vomeronasal type-1 receptor 1	-	-	5	8.9e-07	-	-	-	Putative pheromone receptor.	Belongs to the G-protein coupled receptor 1 family.	Q9GZP7|B3KSV5|Q7Z5H8|Q7Z5H9|	VN1R1_HUMAN
Q9H3N8	HRH4	G-Protein Coupled Receptor	Family 1	Histamine H4 receptor	-	-	5	8.9e-07	-	-	-	The H4 subclass of histamine receptors could mediate the histamine signals in peripheral tissues. Displays a significant level of constitutive activity (spontaneous activity in the absence of agonist).	Belongs to the G-protein coupled receptor 1 family.	Q9H3N8|B0YJ19|B2KJ48|Q4G0I6|Q9GZQ0|	HRH4_HUMAN
Q9Y271	CYSLTR1	G-Protein Coupled Receptor	Family 1	Cysteinyl leukotriene receptor 1	19	-	5	2.61e-06	-	Asthma, Aspirin-Induced|	appendix glandular cells|bone marrow hematopoietic cells|cervix, uterine squamous epithelial cells|colon glandular cells|esophagus squamous epithelial cells|gallbladder glandular cells|lung macrophages|oral mucosa squamous epithelial cells|pancreas exocrine glandular cells|rectum glandular cells|skin Langerhans|skin epidermal cells|skin keratinocytes|skin melanocytes|spleen cells in red pulp|stom…	Receptor for cysteinyl leukotrienes mediating bronchoconstriction of individuals with and without asthma. Stimulation by LTD4 results in the contraction and proliferation of smooth muscle, edema, eosinophil migration and damage to the mucus layer in the lung. This response is mediated via a G-protein that activates a phosphatidylinositol-calcium second messenger system. The rank order of affiniti…	Belongs to the G-protein coupled receptor 1 family.	Q9Y271|B2R954|D3DTE4|Q5JS94|Q8IV19|	CLTR1_HUMAN
P28336	NMBR	G-Protein Coupled Receptor	Family 1	Neuromedin-B receptor	-	-	4	2.61e-06	-	-	-	Receptor for neuromedin-B.	Belongs to the G-protein coupled receptor 1 family.	P28336|E9KL38|Q5VUK8|	NMBR_HUMAN
P30968	GNRHR	G-Protein Coupled Receptor	Family 1	Gonadotropin-releasing hormone receptor	2	-	4	2.61e-06	-	Anxiety|Cryptorchidism|Depressive disorder|Gynecomastia|Hypogonadism|Osteopenia|Osteoporosis|Testicular hypogonadism|Primary physiologic amenorrhea|Secondary physiologic amenorrhea|Erectile dysfunction|Congenital hypoplasia of breast|Infantile uterus|Congenital hypoplasia of penis|Female hypogonadism syndrome|Isolated lutropin deficiency (disorder)|Hypogonadotropic hypogonadism|Idiopathic hypogon…	adrenal gland glandular cells|pituitary gland cells in anterior |	Receptor for gonadotropin releasing hormone (GnRH) that mediates the action of GnRH to stimulate the secretion of the gonadotropic hormones luteinizing hormone (LH) and follicle- stimulating hormone (FSH). This receptor mediates its action by association with G-proteins that activate a phosphatidylinositol- calcium second messenger system. Isoform 2 may act as an inhibitor of GnRH-R signaling.	Belongs to the G-protein coupled receptor 1 family.	P30968|O75793|Q14D13|Q92644|	GNRHR_HUMAN
P32247	BRS3	G-Protein Coupled Receptor	Family 1	Bombesin receptor subtype-3	-	-	4	2.61e-06	-	-	-	Role in sperm cell division, maturation, or function. This receptor mediates its action by association with G proteins that activate a phosphatidylinositol-calcium second messenger system.	Belongs to the G-protein coupled receptor 1 family.	P32247|	BRS3_HUMAN
P46089	GPR3	G-Protein Coupled Receptor	Family 1	G-protein coupled receptor 3	-	-	4	4.665e-05	-	-	-	Orphan receptor with constitutive G(s) signaling activity that activate cyclic AMP. Has a potential role in modulating a number of brain functions, including behavioral responses to stress (By similarity), amyloid-beta peptide generation in neurons and neurite outgrowth (By similarity). Maintains also meiotic arrest in oocytes (By similarity).	Belongs to the G-protein coupled receptor 1 family.	P46089|A8K570|	GPR3_HUMAN
P49683	PRLHR	G-Protein Coupled Receptor	Family 1	Prolactin-releasing peptide receptor	2	-	4	2.61e-06	-	-	pituitary gland cells in anterior |smooth muscle smooth muscle cells|	Receptor for prolactin-releasing peptide (PrRP). Implicated in lactation, regulation of food intake and pain-signal processing.	Belongs to the G-protein coupled receptor 1 family.	P49683|O75194|Q502U8|Q5VXR9|	PRLHR_HUMAN
Q86VZ1	P2RY8	G-Protein Coupled Receptor	Family 1	P2Y purinoceptor 8	5	-	4	7.62e-06	-	Precursor Cell Lymphoblastic Leukemia Lymphoma|	appendix lymphoid tissue|lymph node germinal center cells|spleen cells in red pulp|stomach glandular cells|tonsil germinal center cells|	Probable receptor for purines coupled to G-proteins.	Belongs to the G-protein coupled receptor 1 family.	Q86VZ1|	P2RY8_HUMAN
Q96LB2	MRGPRX1	G-Protein Coupled Receptor	Family 1	Mas-related G-protein coupled receptor member X1	-	-	4	1.69e-05	-	-	-	Orphan receptor. Probably involved in the function of nociceptive neurons. May regulate nociceptor function and/or development, including the sensation or modulation of pain. Potently activated by enkephalins including BAM22 (bovine adrenal medulla peptide 22) and BAM (8-22)(PubMed:26582731). BAM22 is the most potent compound and evoked a large and dose-dependent release of intracellular calcium …	Belongs to the G-protein coupled receptor 1 family. Mas subfamily.	Q96LB2|Q4V9L2|Q8TDD8|Q8TDD9|	MRGX1_HUMAN
Q96P88	GNRHR2	G-Protein Coupled Receptor	Family 1	Putative gonadotropin-releasing hormone II receptor	-	-	4	2.61e-06	-	-	-	Putative receptor for gonadotropin releasing hormone II (GnRH II) which is most probably non-functional.	Belongs to the G-protein coupled receptor 1 family.	Q96P88|E7EN27|Q8TCX8|	GNRR2_HUMAN
Q99463	NPY6R	G-Protein Coupled Receptor	Family 1	Putative neuropeptide Y receptor type 6	-	-	4	2.61e-06	-	-	-	When expressed, is unable to bind pancreatic polypeptide (PP), neuropeptide Y (NPY), or peptide YY (PYY), suggesting that either it is functionally inactive or that it may have acquired a pancreatic polypeptide-independent function.	Belongs to the G-protein coupled receptor 1 family.	Q99463|D3DQB4|	NPY6R_HUMAN
Q9UHM6	OPN4	G-Protein Coupled Receptor	Family 1	Melanopsin	3	-	4	7.739e-05	-	Seasonal Affective Disorder|	retina nerve fibers in inner plexiform layer|retina nerve fibers in nerve fiber layer|retina nerve fibers in outer plexiform layer |	Photoreceptor required for regulation of circadian rhythm. Contributes to pupillar reflex and other non-image forming responses to light. May be able to isomerize covalently bound all- trans retinal back to 11-cis retinal (By similarity).	Belongs to the G-protein coupled receptor 1 family. Opsin subfamily.	Q9UHM6|B7ZLB3|Q14D01|Q2PP22|Q8NGQ9|	OPN4_HUMAN
Q9UKP6	UTS2R	G-Protein Coupled Receptor	Family 1	Urotensin-2 receptor	-	-	4	2.61e-06	-	-	-	High affinity receptor for urotensin-2 and urotensin-2B. The activity of this receptor is mediated by a G-protein that activate a phosphatidylinositol-calcium second messenger system.	Belongs to the G-protein coupled receptor 1 family.	Q9UKP6|B2RMV8|	UR2R_HUMAN
O14718	RRH	G-Protein Coupled Receptor	Family 1	Visual pigment-like receptor peropsin	-	-	3	9.5e-07	-	-	-	May play a role in rpe physiology either by detecting light directly or by monitoring the concentration of retinoids or other photoreceptor-derived compounds.	Belongs to the G-protein coupled receptor 1 family. Opsin subfamily.	O14718|A1A4V2|Q7RTS4|	OPSX_HUMAN
P03999	OPN1SW	G-Protein Coupled Receptor	Family 1	Short-wave-sensitive opsin 1	1	-	3	9.5e-07	-	Color Blindness, Blue|	retina cells in photoreceptor layer |	Visual pigments are the light-absorbing molecules that mediate vision. They consist of an apoprotein, opsin, covalently linked to cis-retinal.	Belongs to the G-protein coupled receptor 1 family. Opsin subfamily.	P03999|Q13877|	OPSB_HUMAN
P04000	OPN1LW	G-Protein Coupled Receptor	Family 1	Long-wave-sensitive opsin 1	-	-	3	9.5e-07	-	Myopia|Night Blindness|Nystagmus|Retinitis Pigmentosa|Low Vision|Color Blindness, Red|Pendular Nystagmus|Cone monochromatism|Achromatopsia incomplete, X-linked|COLORBLINDNESS, PARTIAL, PROTAN SERIES|Nystagmus, continuous pendular|	-	Visual pigments are the light-absorbing molecules that mediate vision. They consist of an apoprotein, opsin, covalently linked to cis-retinal.	Belongs to the G-protein coupled receptor 1 family. Opsin subfamily.	P04000|	OPSR_HUMAN
P04001	OPN1MW	G-Protein Coupled Receptor	Family 1	Medium-wave-sensitive opsin 1	-	-	3	9.5e-07	-	Myopia|Night Blindness|Nystagmus|Retinitis Pigmentosa|Low Vision|Color Blindness, Red-Green|Pendular Nystagmus|Cone monochromatism|Achromatopsia incomplete, X-linked|COLORBLINDNESS, PARTIAL, DEUTAN SERIES|Nystagmus, continuous pendular|	-	Visual pigments are the light-absorbing molecules that mediate vision. They consist of an apoprotein, opsin, covalently linked to cis-retinal.	Belongs to the G-protein coupled receptor 1 family. Opsin subfamily.	P04001|	OPSG_HUMAN
P25021	HRH2	G-Protein Coupled Receptor	Family 1	Histamine H2 receptor	3	-	3	9.765e-05	-	Carcinoma, Transitional Cell|Schizophrenia|Substance Withdrawal Syndrome|Coronary Stenosis|Chemical and Drug Induced Liver Injury|	duodenum glandular cells|small intestine glandular cells|stomach glandular cells|	The H2 subclass of histamine receptors mediates gastric acid secretion. Also appears to regulate gastrointestinal motility and intestinal secretion. Possible role in regulating cell growth and differentiation. The activity of this receptor is mediated by G proteins which activate adenylyl cyclase and, through a separate G protein-dependent mechanism, the phosphoinositide/protein kinase (PKC) sign…	Belongs to the G-protein coupled receptor 1 family.	P25021|B5BUP7|Q14464|Q7Z5R9|	HRH2_HUMAN
Q6U736	OPN5	G-Protein Coupled Receptor	Family 1	Opsin-5	1	-	3	9.5e-07	-	-	retina cells in photoreceptor layer |		Belongs to the G-protein coupled receptor 1 family. Opsin subfamily.	Q6U736|A0AV33|Q5T5B9|Q5T886|Q7Z603|Q86SL5|	OPN5_HUMAN
Q96RJ0	TAAR1	G-Protein Coupled Receptor	Family 1	Trace amine-associated receptor 1	63	-	3	1.196e-05	-	Schizophrenia|	adrenal gland glandular cells|appendix glandular cells|appendix lymphoid tissue|bone marrow hematopoietic cells|breast glandular cells|breast myoepithelial cells|bronchus respiratory epithelial cells|cerebral cortex endothelial cells|cerebral cortex neuronal cells|cerebral cortex neuropil|cervix, uterine glandular cells|cervix, uterine squamous epithelial cells|colon endothelial cells|colon gland…	Receptor for trace amines, including beta- phenylethylamine (b-PEA), p-tyramine (p-TYR), octopamine and tryptamine, with highest affinity for b-PEA and p-TYR. Unresponsive to classical biogenic amines, such as epinephrine and histamine and only partially activated by dopamine and serotonin. Trace amines are biogenic amines present in very low levels in mammalian tissues. Although some trace amine…	Belongs to the G-protein coupled receptor 1 family.	Q96RJ0|Q2M1W5|Q3MIH8|Q5VUQ1|	TAAR1_HUMAN
Q9H1Y3	OPN3	G-Protein Coupled Receptor	Family 1	Opsin-3	53	-	3	9.5e-07	-	-	adrenal gland glandular cells|appendix glandular cells|bone marrow hematopoietic cells|breast glandular cells|breast myoepithelial cells|bronchus respiratory epithelial cells|caudate neuronal cells|cerebellum Purkinje cells|cerebellum cells in molecular layer|cerebral cortex endothelial cells|cerebral cortex neuronal cells|cerebral cortex neuropil|cervix, uterine glandular cells|colon glandular c…	May play a role in encephalic photoreception.	Belongs to the G-protein coupled receptor 1 family. Opsin subfamily.	Q9H1Y3|Q8IX08|Q9Y344|	OPN3_HUMAN
Q9Y2T6	GPR55	G-Protein Coupled Receptor	Family 1	G-protein coupled receptor 55	-	-	3	0.00030707	-	-	-	May be involved in hyperalgesia associated with inflammatory and neuropathic pain (By similarity). Receptor for L- alpha-lysophosphatidylinositol (LPI). LPI induces Ca(2+) release from intracellular stores via the heterotrimeric G protein GNA13 and RHOA. Putative cannabinoid receptor. May play a role in bone physiology by regulating osteoclast number and function.	Belongs to the G-protein coupled receptor 1 family.	Q9Y2T6|Q8N580|	GPR55_HUMAN
O14804	TAAR5	G-Protein Coupled Receptor	Family 1	Trace amine-associated receptor 5	-	-	2	7e-08	-	-	-	Olfactory receptor specific for trimethylamine, a trace amine. Also activated at lower level by dimethylethylamine. Trimethylamine is a bacterial metabolite found in some animal odors, and to humans it is a repulsive odor associated with bad breath and spoiled food. This receptor is probably mediated by the G(s)-class of G-proteins which activate adenylate cyclase.	Belongs to the G-protein coupled receptor 1 family.	O14804|D8KZS1|Q2M1V1|Q4VBL1|Q5VUQ3|Q6NTA8|	TAAR5_HUMAN
O15218	GPR182	G-Protein Coupled Receptor	Family 1	G-protein coupled receptor 182	5	-	2	7e-08	-	-	heart muscle myocytes|spleen cells in white pulp|testis preleptotene spermatocytes|testis sertoli cells|testis spermatogonia|	Orphan receptor.	Belongs to the G-protein coupled receptor 1 family.	O15218|	GP182_HUMAN
P29275	ADORA2B	G-Protein Coupled Receptor	Family 1	Adenosine receptor A2b	-	-	2	7e-08	-	-	-	Receptor for adenosine. The activity of this receptor is mediated by G proteins which activate adenylyl cyclase.	Belongs to the G-protein coupled receptor 1 family.	P29275|	AA2BR_HUMAN
P32249	GPR183	G-Protein Coupled Receptor	Family 1	G-protein coupled receptor 183	58	-	2	6.94e-06	-	IGA Glomerulonephritis|Adult T-Cell Lymphoma/Leukemia|	adrenal gland glandular cells|appendix glandular cells|appendix lymphoid tissue|bone marrow hematopoietic cells|breast glandular cells|breast myoepithelial cells|bronchus respiratory epithelial cells|caudate glial cells|caudate neuronal cells|cerebellum Purkinje cells|cerebellum cells in granular layer|cerebellum cells in molecular layer|cerebral cortex glial cells|cerebral cortex neuronal cells|…	G-protein coupled receptor expressed in lymphocytes that acts as a chemotactic receptor for B-cells, T-cells, splenic dendritic cells, monocytes/macrophages and astrocytes (By similarity). Receptor for oxysterol 7-alpha,25- dihydroxycholesterol (7-alpha,25-OHC) and other related oxysterols (PubMed:21796212, PubMed:22875855, PubMed:22930711). Mediates cell positioning and movement of a number of c…	Belongs to the G-protein coupled receptor 1 family.	P32249|B2R8N5|Q53F99|Q5JUH7|	GP183_HUMAN
P33032	MC5R	G-Protein Coupled Receptor	Family 1	Melanocortin receptor 5	7	-	2	7e-08	-	Bipolar Disorder|Schizophrenia|	adrenal gland glandular cells|caudate neuronal cells|cerebral cortex neuronal cells|cerebral cortex neuropil|hippocampus neuronal cells|stomach glandular cells|testis cells in seminiferous ducts|	Receptor for MSH (alpha, beta and gamma) and ACTH. The activity of this receptor is mediated by G proteins which activate adenylate cyclase. This receptor is a possible mediator of the immunomodulation properties of melanocortins.	Belongs to the G-protein coupled receptor 1 family.	P33032|B0YJ34|Q502V1|	MC5R_HUMAN
Q01718	MC2R	G-Protein Coupled Receptor	Family 1	Adrenocorticotropic hormone receptor	-	-	2	7e-08	-	Bipolar Disorder|Epilepsy|GLUCOCORTICOID DEFICIENCY 1|Pediatric failure to thrive|	-	Receptor for corticotropin (ACTH). This receptor is mediated by G proteins (G(s)) which activate adenylate cyclase (cAMP).	Belongs to the G-protein coupled receptor 1 family.	Q01718|A8K016|Q3MI45|Q504X6|	ACTHR_HUMAN
Q16570	ACKR1	G-Protein Coupled Receptor	Family 1	Atypical chemokine receptor 1	2	-	2	1.1e-06	-	Malaria|	colon endothelial cells|kidney cells in glomeruli|	Atypical chemokine receptor that controls chemokine levels and localization via high-affinity chemokine binding that is uncoupled from classic ligand-driven signal transduction cascades, resulting instead in chemokine sequestration, degradation, or transcytosis. Also known as interceptor (internalizing receptor) or chemokine-scavenging receptor or chemokine decoy receptor. Has a promiscuous chemo…	Belongs to the G-protein coupled receptor 1 family. Atypical chemokine receptor subfamily.	Q16570|A8YPG5|O75898|Q16300|Q8WWE3|Q9UJP0|Q9UKZ5|Q9UKZ6|Q9UQE1|	ACKR1_HUMAN
Q8TDT2	GPR152	G-Protein Coupled Receptor	Family 1	Probable G-protein coupled receptor 152	-	-	2	0.00240964	-	-	-	Orphan receptor.	Belongs to the G-protein coupled receptor 1 family.	Q8TDT2|Q0VD88|Q86SM0|	GP152_HUMAN
Q969N4	TAAR8	G-Protein Coupled Receptor	Family 1	Trace amine-associated receptor 8	-	-	2	7e-08	-	-	-	Orphan receptor. Could be a receptor for trace amines. Trace amines are biogenic amines present in very low levels in mammalian tissues. Although some trace amines have clearly defined roles as neurotransmitters in invertebrates, the extent to which they function as true neurotransmitters in vertebrates has remained speculative. Trace amines are likely to be involved in a variety of physiological…	Belongs to the G-protein coupled receptor 1 family.	Q969N4|Q5VUQ0|	TAAR8_HUMAN
Q96CH1	GPR146	G-Protein Coupled Receptor	Family 1	Probable G-protein coupled receptor 146	-	-	2	3.45e-06	-	-	-	Orphan receptor.	Belongs to the G-protein coupled receptor 1 family.	Q96CH1|Q86SP5|	GP146_HUMAN
Q96RI8	TAAR6	G-Protein Coupled Receptor	Family 1	Trace amine-associated receptor 6	-	-	2	7e-08	-	Bipolar Disorder|Depressive disorder|Schizophrenia|	-	Orphan receptor. Could be a receptor for trace amines. Trace amines are biogenic amines present in very low levels in mammalian tissues. Although some trace amines have clearly defined roles as neurotransmitters in invertebrates, the extent to which they function as true neurotransmitters in vertebrates has remained speculative. Trace amines are likely to be involved in a variety of physiological…	Belongs to the G-protein coupled receptor 1 family.	Q96RI8|Q5VUQ4|	TAAR6_HUMAN
Q96RI9	TAAR9	G-Protein Coupled Receptor	Family 1	Trace amine-associated receptor 9	-	-	2	7e-08	-	-	-	Orphan receptor. Could be a receptor for trace amines. Trace amines are biogenic amines present in very low levels in mammalian tissues. Although some trace amines have clearly defined roles as neurotransmitters in invertebrates, the extent to which they function as true neurotransmitters in vertebrates has remained speculative. Trace amines are likely to be involved in a variety of physiological…	Belongs to the G-protein coupled receptor 1 family.	Q96RI9|	TAAR9_HUMAN
Q9P1P4	TAAR3P	G-Protein Coupled Receptor	Family 1	Putative trace amine-associated receptor 3	-	-	2	7e-08	-	-	-		Belongs to the G-protein coupled receptor 1 family.	Q9P1P4|	TAAR3_HUMAN
Q9P1P5	TAAR2	G-Protein Coupled Receptor	Family 1	Trace amine-associated receptor 2	-	-	2	7e-08	-	-	-	Orphan receptor.	Belongs to the G-protein coupled receptor 1 family.	Q9P1P5|Q5QD02|Q6NWS1|Q6NWS2|Q6NWS3|	TAAR2_HUMAN
Q9Y2T5	GPR52	G-Protein Coupled Receptor	Family 1	G-protein coupled receptor 52	-	-	2	5.39e-06	-	Nonorganic psychosis|	-	Gs-coupled receptor activated by antipsychotics reserpine leading to an increase in intracellular cAMP and its internalization (PubMed:24587241). May play a role in locomotor activity through modulation of dopamine, NMDA and ADORA2A-induced locomotor activity. These behavioral changes are accompanied by modulation of the dopamine receptor signaling pathway in striatum (PubMed:24587241). Modulates…	Belongs to the G-protein coupled receptor 1 family.	Q9Y2T5|O75654|Q4VBL6|Q6ISM0|	GPR52_HUMAN
O00155	GPR25	G-Protein Coupled Receptor	Family 1	Probable G-protein coupled receptor 25	-	-	1	0	-	-	-	Orphan receptor.	Belongs to the G-protein coupled receptor 1 family.	O00155|A0AVJ5|	GPR25_HUMAN
O43194	GPR39	G-Protein Coupled Receptor	Family 1	G-protein coupled receptor 39	21	-	1	0	-	-	adrenal gland glandular cells|bone marrow hematopoietic cells|breast adipocytes|caudate glial cells|caudate neuronal cells|cerebellum cells in granular layer|cerebral cortex glial cells|cervix, uterine squamous epithelial cells|endometrium cells in endometrial stroma|esophagus squamous epithelial cells|heart muscle myocytes|hippocampus glial cells|kidney cells in tubules|lung macrophages|lymph no…	Zn(2+) acts as an agonist. This receptor mediates its action by association with G proteins that activate a phosphatidylinositol-calcium second messenger system. Its effect is mediated mainly through G(q)-alpha and G(12)/G(13) proteins. Involved in regulation of body weight, gastrointestinal mobility, hormone secretion and cell death (By similarity).	Belongs to the G-protein coupled receptor 1 family.	O43194|B2RC12|B6V9G4|Q08AS2|Q53R01|	GPR39_HUMAN
P0DN78	OPN1MW3	G-Protein Coupled Receptor	Family 1	Medium-wave-sensitive opsin 3	-	-	1	0	-	Myopia|Night Blindness|Nystagmus|Retinitis Pigmentosa|Low Vision|Color Blindness, Red-Green|Pendular Nystagmus|Cone monochromatism|Achromatopsia incomplete, X-linked|COLORBLINDNESS, PARTIAL, DEUTAN SERIES|Nystagmus, continuous pendular|	-	Visual pigments are the light-absorbing molecules that mediate vision. They consist of an apoprotein, opsin, covalently linked to cis-retinal.	Belongs to the G-protein coupled receptor 1 family. Opsin subfamily.	P0DN78|	OPSG3_HUMAN
P46091	GPR1	G-Protein Coupled Receptor	Family 1	G-protein coupled receptor 1	-	-	1	0	-	-	-	Receptor for the inflammation-associated leukocyte chemoattractant chemerin/RARRES2 suggesting a role for this receptor in the regulation of inflammation. Can act as a coreceptor for HIV-1.	Belongs to the G-protein coupled receptor 1 family.	P46091|A5JUU6|A8K4L1|Q53TR9|Q6NVX4|	GPR1_HUMAN
P48145	NPBWR1	G-Protein Coupled Receptor	Family 1	Neuropeptides B/W receptor type 1	-	-	1	0	-	-	-	Interacts specifically with a number of opioid ligands. Receptor for neuropeptides B and W, which may be involved in neuroendocrine system regulation, food intake and the organization of other signals. Has a higher affinity for neuropeptide B.	Belongs to the G-protein coupled receptor 1 family.	P48145|Q6NTC7|	NPBW1_HUMAN
P49685	GPR15	G-Protein Coupled Receptor	Family 1	G-protein coupled receptor 15	15	-	1	0	-	-	adrenal gland glandular cells|bone marrow hematopoietic cells|caudate neuronal cells|epididymis glandular cells|gallbladder glandular cells|heart muscle myocytes|hippocampus neuronal cells|liver hepatocytes|lymph node non-germinal center cells|ovary follicle cells|salivary gland glandular cells|soft tissue chondrocytes|stomach glandular cells|testis Leydig cells|thyroid gland glandular cells|	Probable chemokine receptor. Alternative coreceptor with CD4 for HIV-1 infection.	Belongs to the G-protein coupled receptor 1 family.	P49685|Q3MIL4|Q6ISN6|	GPR15_HUMAN
Q15391	P2RY14	G-Protein Coupled Receptor	Family 1	P2Y purinoceptor 14	64	-	1	0	-	-	adrenal gland glandular cells|appendix glandular cells|appendix lymphoid tissue|bone marrow hematopoietic cells|breast glandular cells|breast myoepithelial cells|bronchus respiratory epithelial cells|caudate neuronal cells|cerebellum Purkinje cells|cerebellum cells in granular layer|cerebellum cells in molecular layer|cerebral cortex endothelial cells|cerebral cortex glial cells|cerebral cortex n…	Receptor for UDP-glucose and other UDP-sugar coupled to G-proteins. Not activated by ATP, ADP, UTP or ATP.	Belongs to the G-protein coupled receptor 1 family.	Q15391|Q8IYT7|	P2Y14_HUMAN
Q5NUL3	FFAR4	G-Protein Coupled Receptor	Family 1	Free fatty acid receptor 4	-	-	1	0	-	-	-	Receptor for medium and long-chain free fatty acids (FFAs). Signals via a G(q)/G(11)-coupled pathway. Acts as a receptor for omega-3 fatty acids and mediates robust anti- inflammatory effects, particularly in macrophages and fat cells. The anti-inflammatory effects involve inhibition of TAK1 through a beta-arrestin 2 (ARRB2)/TAB1-dependent effect, but independent of the G(q)/G(11)-coupled pathway…	Belongs to the G-protein coupled receptor 1 family.	Q5NUL3|Q495H1|Q5VY25|Q5VY26|Q7Z605|Q86SM7|	FFAR4_HUMAN
Q6W5P4	NPSR1	G-Protein Coupled Receptor	Family 1	Neuropeptide S receptor	11	-	1	0	-	Alcoholic Intoxication, Chronic|Asthma|Mental Depression|Depressive disorder|Schizophrenia|ASTHMA-RELATED TRAITS, SUSCEPTIBILITY TO, 2|	adrenal gland glandular cells|appendix glandular cells|colon glandular cells|duodenum glandular cells|ovary follicle cells|pancreas islets of Langerhans|parathyroid gland glandular cells|rectum glandular cells|small intestine glandular cells|soft tissue chondrocytes|stomach glandular cells|	G-protein coupled receptor for neuropeptide S (NPS) (PubMed:16790440). Promotes mobilization of intracellular Ca(2+) stores (PubMed:16790440). Inhibits cell growth in response to NPS binding (PubMed:15947423). Involved in pathogenesis of asthma and other IgE-mediated diseases.	Belongs to the G-protein coupled receptor 1 family. Vasopressin/oxytocin receptor subfamily.	Q6W5P4|A2RTZ4|Q2XP58|Q56H76|Q56H77|Q56H78|Q6JSL4|Q6JSL5|Q6JSL6|Q6JSL7|Q6JSL8|Q6W5P3|Q6ZMB8|	NPSR1_HUMAN
Q7Z602	GPR141	G-Protein Coupled Receptor	Family 1	Probable G-protein coupled receptor 141	-	-	1	0	-	-	-	Orphan receptor.	Belongs to the G-protein coupled receptor 1 family.	Q7Z602|A4D1X7|Q0VAR5|Q86SP3|	GP141_HUMAN
Q86SM8	MRGPRE	G-Protein Coupled Receptor	Family 1	Mas-related G-protein coupled receptor member E	-	-	1	0	-	-	-	Orphan receptor. May regulate nociceptor function and/or development, including the sensation or modulation of pain.	Belongs to the G-protein coupled receptor 1 family. Mas subfamily.	Q86SM8|Q2M1V7|	MRGRE_HUMAN
Q8NDV2	GPR26	G-Protein Coupled Receptor	Family 1	G-protein coupled receptor 26	1	-	1	0	-	-	cerebral cortex glial cells|	Orphan receptor. Displays a significant level of constitutive activity. Its effect is mediated by G(s)-alpha protein that stimulate adenylate cyclase, resulting in an elevation of intracellular cAMP.	Belongs to the G-protein coupled receptor 1 family.	Q8NDV2|Q2M2E2|	GPR26_HUMAN
Q8TDS7	MRGPRD	G-Protein Coupled Receptor	Family 1	Mas-related G-protein coupled receptor member D	-	-	1	0	-	-	-	May regulate nociceptor function and/or development, including the sensation or modulation of pain. Functions as a specific membrane receptor for beta-alanine. Beta-alanine at micromolar doses specifically evoked Ca(2+) influx in cells expressing the receptor. Beta-alanine decreases forskolin- stimulated cAMP production in cells expressing the receptor, suggesting that the receptor couples with G…	Belongs to the G-protein coupled receptor 1 family. Mas subfamily.	Q8TDS7|Q8NGK7|	MRGRD_HUMAN
Q8TDV0	GPR151	G-Protein Coupled Receptor	Family 1	Probable G-protein coupled receptor 151	-	-	1	0	-	-	-	Orphan receptor.	Belongs to the G-protein coupled receptor 1 family.	Q8TDV0|Q86SN8|Q8NGV2|	GP151_HUMAN
Q99678	GPR20	G-Protein Coupled Receptor	Family 1	G-protein coupled receptor 20	-	-	1	0	-	-	-	Orphan receptor with constitutive G(i) signaling activity that activate cyclic AMP.	Belongs to the G-protein coupled receptor 1 family.	Q99678|Q17R96|	GPR20_HUMAN
Q9NYM4	GPR83	G-Protein Coupled Receptor	Family 1	Probable G-protein coupled receptor 83	-	-	1	0	-	-	-	Orphan receptor. Could be a neuropeptide Y receptor.	Belongs to the G-protein coupled receptor 1 family.	Q9NYM4|B0M0K5|Q6NWR4|Q9P1Y8|	GPR83_HUMAN
Q9Y5Y4	PTGDR2	G-Protein Coupled Receptor	Family 1	Prostaglandin D2 receptor 2	6	-	1	0	-	Asthma|Asthma, Aspirin-Induced|	adrenal gland glandular cells|cerebral cortex neuropil|liver hepatocytes|pancreas islets of Langerhans|stomach glandular cells|testis Leydig cells|	Receptor for prostaglandin D2 (PGD2). Coupled to the G(i)-protein. Receptor activation may result in pertussis toxin- sensitive decreases in cAMP levels and Ca(2+) mobilization. PI3K signaling is also implicated in mediating PTGDR2 effects. PGD2 induced receptor internalization. CRTH2 internalization can be regulated by diverse kinases such as, PKC, PKA, GRK2, GPRK5/GRK5 and GRK6. Receptor activa…	Belongs to the G-protein coupled receptor 1 family.	Q9Y5Y4|O94765|Q4QRI6|	PD2R2_HUMAN
P43220	GLP1R	G-Protein Coupled Receptor	Family 2	Glucagon-like peptide 1 receptor	-	-	16	0.00219812	-	-	-	G-protein coupled receptor for glucagon-like peptide 1 (GLP-1) (PubMed:8405712, PubMed:8216285, PubMed:7517895, PubMed:19861722, PubMed:26308095, PubMed:27196125, PubMed:28514449). Ligand binding triggers activation of a signaling cascade that leads to the activation of adenylyl cyclase and increased intracellular cAMP levels (PubMed:8405712, PubMed:8216285, PubMed:7517895, PubMed:19861722, PubMe…	Belongs to the G-protein coupled receptor 2 family.	P43220|Q2M229|Q99669|	GLP1R_HUMAN
P47872	SCTR	G-Protein Coupled Receptor	Family 2	Secretin receptor	12	-	13	0.00024414	-	-	bronchus respiratory epithelial cells|duodenum glandular cells|epididymis glandular cells|kidney cells in tubules|lung pneumocytes|nasopharynx respiratory epithelial cells|oral mucosa squamous epithelial cells|pancreas exocrine glandular cells|seminal vesicle glandular cells|small intestine glandular cells|soft tissue chondrocytes|stomach glandular cells|	This is a receptor for secretin. The activity of this receptor is mediated by G proteins which activate adenylyl cyclase.	Belongs to the G-protein coupled receptor 2 family.	P47872|Q12961|Q13213|Q53T00|	SCTR_HUMAN
Q03431	PTH1R	G-Protein Coupled Receptor	Family 2	Parathyroid hormone/parathyroid hormone-related peptide receptor	40	-	13	0.00049904	-	Choanal Atresia|Clubbed Fingers|Dwarfism|Enchondromatosis|Exophthalmos|Hydrops Fetalis|Hypercalcemia|Hyperparathyroidism|Hypodontia|Hypoparathyroidism|Micrognathism|Micromelia|Nephrocalcinosis|Osteopenia|Osteosclerosis|Rickets|Cataract|Acquired cubitus valgus|Brachycephaly|Low set ears|Mandibular hypoplasia|Spade-like hand|Metaphyseal chondrodysplasia|Jansen type metaphyseal chondrodysplasia|Cong…	adrenal gland glandular cells|bone marrow hematopoietic cells|breast glandular cells|bronchus respiratory epithelial cells|caudate neuronal cells|cerebellum Purkinje cells|cerebral cortex endothelial cells|cerebral cortex neuronal cells|cervix, uterine glandular cells|colon endothelial cells|colon glandular cells|duodenum glandular cells|endometrium glandular cells|epididymis glandular cells|fall…	Receptor for parathyroid hormone and for parathyroid hormone-related peptide. The activity of this receptor is mediated by G proteins which activate adenylyl cyclase and also a phosphatidylinositol-calcium second messenger system.	Belongs to the G-protein coupled receptor 2 family.	Q03431|Q2M1U3|	PTH1R_HUMAN
P41587	VIPR2	G-Protein Coupled Receptor	Family 2	Vasoactive intestinal polypeptide receptor 2	34	-	11	0.00063736	-	Bipolar Disorder|Schizophrenia|	breast adipocytes|breast glandular cells|breast myoepithelial cells|cerebral cortex endothelial cells|colon endothelial cells|endometrium cells in endometrial stroma|esophagus squamous epithelial cells|fallopian tube glandular cells|heart muscle myocytes|kidney cells in glomeruli|kidney cells in tubules|lung pneumocytes|oral mucosa squamous epithelial cells|ovary ovarian stroma cells|placenta dec…	This is a receptor for VIP as well as PACAP-38 and -27, the activity of this receptor is mediated by G proteins which activate adenylyl cyclase. Can be coupled to phospholipase C.	Belongs to the G-protein coupled receptor 2 family.	P41587|Q13053|Q15870|Q53Y09|Q6ZN22|Q9UCW0|	VIPR2_HUMAN
P30988	CALCR	G-Protein Coupled Receptor	Family 2	Calcitonin receptor	8	-	10	0.00014103	-	Hypercalcemia|Osteoporosis|	adrenal gland glandular cells|cerebellum cells in molecular layer|duodenum glandular cells|hypothalamus neuronal cells|hypothalamus neuronal projections|kidney cells in tubules|small intestine glandular cells|testis Leydig cells|	This is a receptor for calcitonin. The activity of this receptor is mediated by G proteins which activate adenylyl cyclase. The calcitonin receptor is thought to couple to the heterotrimeric guanosine triphosphate-binding protein that is sensitive to cholera toxin.	Belongs to the G-protein coupled receptor 2 family.	P30988|A4D1G6|F5H605|O14585|Q13941|Q5ZGL8|Q659U6|Q6DJU8|Q6T712|	CALCR_HUMAN
P34998	CRHR1	G-Protein Coupled Receptor	Family 2	Corticotropin-releasing factor receptor 1	11	-	10	0.0005794	-	Alcoholic Intoxication, Chronic|Anorexia|Bipolar Disorder|Mental Depression|Depressive disorder|Contact Dermatitis|Unipolar Depression|Anhedonia|Nonorganic psychosis|Major Depressive Disorder|	adrenal gland glandular cells|caudate neuronal cells|cerebral cortex neuronal cells|epididymis glandular cells|hippocampus neuronal cells|pancreas islets of Langerhans|pituitary gland cells in anterior |seminal vesicle glandular cells|testis Leydig cells|testis cells in seminiferous ducts|thyroid gland glandular cells|	G-protein coupled receptor for CRH (corticotropin- releasing factor) and UCN (urocortin). Has high affinity for CRH and UCN. Ligand binding causes a conformation change that triggers signaling via guanine nucleotide-binding proteins (G proteins) and down-stream effectors, such as adenylate cyclase. Promotes the activation of adenylate cyclase, leading to increased intracellular cAMP levels. Inhib…	Belongs to the G-protein coupled receptor 2 family.	P34998|B4DIE9|Q13008|Q4QRJ1|Q9UK64|	CRFR1_HUMAN
P32241	VIPR1	G-Protein Coupled Receptor	Family 2	Vasoactive intestinal polypeptide receptor 1	69	-	9	0.00023266	-	Liver Cirrhosis, Experimental|	adrenal gland glandular cells|appendix glandular cells|bone marrow hematopoietic cells|breast glandular cells|breast myoepithelial cells|bronchus respiratory epithelial cells|caudate glial cells|caudate neuronal cells|cerebellum Purkinje cells|cerebellum cells in granular layer|cerebral cortex endothelial cells|cerebral cortex glial cells|cerebral cortex neuronal cells|cerebral cortex neuropil|ce…	This is a receptor for VIP. The activity of this receptor is mediated by G proteins which activate adenylyl cyclase. The affinity is VIP = PACAP-27 > PACAP-38.	Belongs to the G-protein coupled receptor 2 family.	P32241|A5JUT9|B3KPV1|B4DEB5|B4DGI4|F5H1F5|G3V0I1|Q15871|Q6P2M6|	VIPR1_HUMAN
P41586	ADCYAP1R1	G-Protein Coupled Receptor	Family 2	Pituitary adenylate cyclase-activating polypeptide type I receptor	23	-	9	0.00011683	-	Asthma|Mental Depression|Depressive disorder|Schizophrenia|	adrenal gland glandular cells|appendix glandular cells|bone marrow hematopoietic cells|bronchus respiratory epithelial cells|cerebral cortex neuropil|colon endothelial cells|colon glandular cells|colon peripheral nerve/ganglion|duodenum glandular cells|fallopian tube glandular cells|gallbladder glandular cells|kidney cells in glomeruli|kidney cells in tubules|lung macrophages|nasopharynx respirat…	This is a receptor for PACAP-27 and PACAP-38. The activity of this receptor is mediated by G proteins which activate adenylyl cyclase. May regulate the release of adrenocorticotropin, luteinizing hormone, growth hormone, prolactin, epinephrine, and catecholamine. May play a role in spermatogenesis and sperm motility. Causes smooth muscle relaxation and secretion in the gastrointestinal tract.	Belongs to the G-protein coupled receptor 2 family.	P41586|A8K1Y1|B7ZLA7|B8ZZK3|Q17S10|	PACR_HUMAN
O95838	GLP2R	G-Protein Coupled Receptor	Family 2	Glucagon-like peptide 2 receptor	14	-	7	4.282e-05	-	-	adrenal gland glandular cells|appendix glandular cells|cervix, uterine squamous epithelial cells|colon glandular cells|duodenum glandular cells|esophagus squamous epithelial cells|gallbladder glandular cells|oral mucosa squamous epithelial cells|rectum glandular cells|skin Langerhans|skin epidermal cells|skin keratinocytes|small intestine glandular cells|vagina squamous epithelial cells|	This is a receptor for glucagon-like peptide 2. The activity of this receptor is mediated by G proteins which activate adenylyl cyclase.	Belongs to the G-protein coupled receptor 2 family.	O95838|Q4VAT3|	GLP2R_HUMAN
Q13324	CRHR2	G-Protein Coupled Receptor	Family 2	Corticotropin-releasing factor receptor 2	-	-	7	0.00053117	-	Anorexia|Bipolar Disorder|Mental Depression|Depressive disorder|Anhedonia|Dysphoric mood|	-	G-protein coupled receptor for CRH (corticotropin- releasing factor), UCN (urocortin), UCN2 and UCN3. Has high affinity for UCN. Ligand binding causes a conformation change that triggers signaling via guanine nucleotide-binding proteins (G proteins) and down-stream effectors, such as adenylate cyclase. Promotes the activation of adenylate cyclase, leading to increased intracellular cAMP levels.	Belongs to the G-protein coupled receptor 2 family.	Q13324|B2R967|B3SXS6|B3SXS7|B3SXS8|B3SXT0|F8WA81|O43461|Q4QRJ4|Q99431|	CRFR2_HUMAN
Q16602	CALCRL	G-Protein Coupled Receptor	Family 2	Calcitonin gene-related peptide type 1 receptor	66	-	7	0.00010985	-	Dermatitis, Allergic Contact|	adrenal gland glandular cells|appendix glandular cells|appendix lymphoid tissue|bone marrow hematopoietic cells|breast adipocytes|breast glandular cells|breast myoepithelial cells|bronchus respiratory epithelial cells|caudate glial cells|cerebellum Purkinje cells|cerebellum cells in granular layer|cerebral cortex endothelial cells|cerebral cortex glial cells|cerebral cortex neuronal cells|cerebra…	Receptor for calcitonin-gene-related peptide (CGRP) together with RAMP1 and receptor for adrenomedullin together with RAMP3 (By similarity). Receptor for adrenomedullin together with RAMP2. The activity of this receptor is mediated by G proteins which activate adenylyl cyclase.	Belongs to the G-protein coupled receptor 2 family.	Q16602|A8K6G5|A8KAD3|Q53S02|Q53TS5|	CALRL_HUMAN
P49190	PTH2R	G-Protein Coupled Receptor	Family 2	Parathyroid hormone 2 receptor	8	-	6	1.56e-05	-	-	cerebral cortex endothelial cells|colon endothelial cells|colon peripheral nerve/ganglion|kidney cells in glomeruli|pancreas exocrine glandular cells|pancreas islets of Langerhans|skeletal muscle myocytes|stomach glandular cells|	This is a specific receptor for parathyroid hormone. The activity of this receptor is mediated by G proteins which activate adenylyl cyclase. PTH2R may be responsible for PTH effects in a number of physiological systems. It may play a significant role in pancreatic function. PTH2R presence in neurons indicates that it may function as a neurotransmitter receptor (By similarity).	Belongs to the G-protein coupled receptor 2 family.	P49190|Q8N429|	PTH2R_HUMAN
Q02643	GHRHR	G-Protein Coupled Receptor	Family 2	Growth hormone-releasing hormone receptor	-	-	6	0.0001	-	Isolated Growth Hormone Deficiency, Type IB|Isolated somatotropin deficiency|	-	Receptor for GRF, coupled to G proteins which activate adenylyl cyclase. Stimulates somatotroph cell growth, growth hormone gene transcription and growth hormone secretion.	Belongs to the G-protein coupled receptor 2 family.	Q02643|Q99863|	GHRHR_HUMAN
Q8IZF4	ADGRG5	G-Protein Coupled Receptor	Family 2	Adhesion G-protein coupled receptor G5	11	-	6	0.00118807	-	-	appendix glandular cells|bone marrow hematopoietic cells|breast glandular cells|kidney cells in tubules|lymph node non-germinal center cells|parathyroid gland glandular cells|rectum glandular cells|spleen cells in red pulp|stomach glandular cells|testis cells in seminiferous ducts|tonsil non-germinal center cells|	Adhesion G protein-coupled receptor (GPCR). Transduces intracellular signals through coupling to guanine nucleotide- binding protein G(s) subunit alpha and activation of adenylate cyclase pathway. Isoform 1, but not isoform 2, is constitutively active, as evidenced by elevated basal cAMP levels, and responds to mechanical activation (shaking).	Belongs to the G-protein coupled receptor 2 family. Adhesion G-protein coupled receptor (ADGR) subfamily.	Q8IZF4|A0A024R6S3|A8K9R8|B3KXZ5|Q6ZMH7|Q6ZML4|Q86SL8|Q8IZ14|	AGRG5_HUMAN
P47871	GCGR	G-Protein Coupled Receptor	Family 2	Glucagon receptor	-	-	5	6.826e-05	-	Diabetes Mellitus, Non-Insulin-Dependent|Acth-Independent Macronodular Adrenal Hyperplasia|	-	G-protein coupled receptor for glucagon that plays a central role in the regulation of blood glucose levels and glucose homeostasis. Regulates the rate of hepatic glucose production by promoting glycogen hydrolysis and gluconeogenesis. Plays an important role in mediating the responses to fasting. Ligand binding causes a conformation change that triggers signaling via guanine nucleotide-binding p…	Belongs to the G-protein coupled receptor 2 family.	P47871|Q2M3M5|	GLR_HUMAN
P48960	CD97	G-Protein Coupled Receptor	Family 2	CD97 antigen	-	-	5	0.00214636	-	-	-	Receptor potentially involved in both adhesion and signaling processes early after leukocyte activation. Plays an essential role in leukocyte migration (By similarity).	Belongs to the G-protein coupled receptor 2 family. LN-TM7 subfamily.	P48960|A8K7Z4|B2RBJ9|O00718|O76101|Q8NG72|Q8TBQ7|	CD97_HUMAN
O14514	ADGRB1	G-Protein Coupled Receptor	Family 2	Adhesion G protein-coupled receptor B1	-	-	4	0.00015681	-	-	-	Phosphatidylserine receptor which enhances the engulfment of apoptotic cells (PubMed:24509909). Also mediates the binding and engulfment of Gram-negative bacteria (PubMed:26838550). Stimulates production of reactive oxygen species by macrophages in response to Gram-negative bacteria, resulting in enhanced microbicidal macrophage activity (PubMed:26838550). In the gastric mucosa, required for reco…	Belongs to the G-protein coupled receptor 2 family. LN-TM7 subfamily.	O14514|	AGRB1_HUMAN
Q9Y653	ADGRG1	G-Protein Coupled Receptor	Family 2	Adhesion G-protein coupled receptor G1	54	-	4	0.00010502	-	Epilepsy|Esotropia|Exotropia|Mental Retardation|Nystagmus|Cerebellar Hypoplasia|Global developmental delay|Mental deficiency|POLYMICROGYRIA, BILATERAL FRONTOPARIETAL|	adrenal gland glandular cells|appendix glandular cells|bone marrow hematopoietic cells|breast glandular cells|breast myoepithelial cells|bronchus respiratory epithelial cells|cerebral cortex endothelial cells|cerebral cortex neuronal cells|cerebral cortex neuropil|cervix, uterine glandular cells|colon endothelial cells|colon glandular cells|colon peripheral nerve/ganglion|duodenum glandular cells…	Receptor involved in cell adhesion and probably in cell- cell interactions. Mediates cell matrix adhesion in developing neurons and hematopoietic stem cells. Receptor for collagen III/COL3A1 in the developing brain and involved in regulation of cortical development, specifically in maintenance of the pial basement membrane integrity and in cortical lamination (By similarity). Binding to the COL3A…	Belongs to the G-protein coupled receptor 2 family. LN-TM7 subfamily.	Q9Y653|A6NIT7|A6NJV9|B0M0K4|B4DR54|O95966|Q6ZMP1|Q8NGB3|Q96HB4|	AGRG1_HUMAN
P48546	GIPR	G-Protein Coupled Receptor	Family 2	Gastric inhibitory polypeptide receptor	32	-	3	0.00023101	-	Non-Small Cell Lung Carcinoma|	adrenal gland glandular cells|breast glandular cells|breast myoepithelial cells|cerebral cortex endothelial cells|cerebral cortex glial cells|colon glandular cells|colon peripheral nerve/ganglion|duodenum glandular cells|epididymis glandular cells|esophagus squamous epithelial cells|fallopian tube glandular cells|gallbladder glandular cells|heart muscle myocytes|hippocampus neuronal cells|kidney …	This is a receptor for GIP. The activity of this receptor is mediated by G proteins which activate adenylyl cyclase.	Belongs to the G-protein coupled receptor 2 family.	P48546|B7WP14|B7ZKQ0|Q14401|Q16400|Q52M04|Q9UPI1|	GIPR_HUMAN
Q9UHX3	ADGRE2	G-Protein Coupled Receptor	Family 2	Adhesion G protein-coupled receptor E2	-	-	3	0.00241327	-	Rosacea|Urticaria|	-	Cell surface receptor that binds to the chondroitin sulfate moiety of glycosaminoglycan chains and promotes cell attachment. Promotes granulocyte chemotaxis, degranulation and adhesion. In macrophages, promotes the release of inflammatory cytokines, including IL8 and TNF. Signals probably through G- proteins. Is a regulator of mast cell degranulation (PubMed:26841242).	Belongs to the G-protein coupled receptor 2 family. Adhesion G-protein coupled receptor (ADGR) subfamily.	Q9UHX3|B4DQ96|E7ESD7|E9PBR1|E9PEL6|E9PFQ5|E9PG91|Q8NG96|Q9Y4B1|	AGRE2_HUMAN
O94910	ADGRL1	G-Protein Coupled Receptor	Family 2	Adhesion G protein-coupled receptor L1	30	-	2	1.374e-05	-	-	adrenal gland glandular cells|appendix glandular cells|breast glandular cells|cerebellum Purkinje cells|cerebral cortex neuropil|cervix, uterine glandular cells|colon glandular cells|colon peripheral nerve/ganglion|duodenum glandular cells|endometrium glandular cells|epididymis glandular cells|fallopian tube glandular cells|gallbladder glandular cells|kidney cells in tubules|liver bile duct cells…	Calcium-independent receptor of high affinity for alpha- latrotoxin, an excitatory neurotoxin present in black widow spider venom which triggers massive exocytosis from neurons and neuroendocrine cells. Receptor for TENM2 that mediates heterophilic synaptic cell-cell contact and postsynaptic specialization. Receptor probably implicated in the regulation of exocytosis (By similarity).	Belongs to the G-protein coupled receptor 2 family. Adhesion G-protein coupled receptor (ADGR) subfamily.	O94910|Q96IE7|Q9BU07|Q9HAR3|	AGRL1_HUMAN
Q8IWK6	ADGRA3	G-Protein Coupled Receptor	Family 2	Adhesion G protein-coupled receptor A3	34	-	2	8.6e-07	-	-	adrenal gland glandular cells|appendix glandular cells|breast glandular cells|bronchus respiratory epithelial cells|caudate neuronal cells|cerebellum Purkinje cells|cerebral cortex neuronal cells|cervix, uterine glandular cells|colon endothelial cells|colon glandular cells|colon peripheral nerve/ganglion|duodenum glandular cells|endometrium glandular cells|epididymis glandular cells|esophagus squ…	Orphan receptor that may have a role in planar cell polarity pathway.	Belongs to the G-protein coupled receptor 2 family. Adhesion G-protein coupled receptor (ADGR) subfamily.	Q8IWK6|Q6UXK9|Q86SQ5|Q8TC55|	AGRA3_HUMAN
Q9HAR2	ADGRL3	G-Protein Coupled Receptor	Family 2	Adhesion G protein-coupled receptor L3	74	-	2	0	-	Attention deficit hyperactivity disorder|	adrenal gland glandular cells|appendix glandular cells|appendix lymphoid tissue|bone marrow hematopoietic cells|breast adipocytes|breast glandular cells|breast myoepithelial cells|bronchus respiratory epithelial cells|caudate glial cells|caudate neuronal cells|cerebellum Purkinje cells|cerebellum cells in granular layer|cerebellum cells in molecular layer|cerebral cortex endothelial cells|cerebra…	Plays a role in cell-cell adhesion and neuron guidance via its interactions with FLRT2 and FLRT3 that are expressed at the surface of adjacent cells (PubMed:26235030). Plays a role in the development of glutamatergic synapses in the cortex. Important in determining the connectivity rates between the principal neurons in the cortex.	Belongs to the G-protein coupled receptor 2 family. LN-TM7 subfamily.	Q9HAR2|E9PE04|O94867|Q9NWK5|	AGRL3_HUMAN
Q9HCU4	CELSR2	G-Protein Coupled Receptor	Family 2	Cadherin EGF LAG seven-pass G-type receptor 2	-	-	2	4.23e-06	-	Endometrial Hyperplasia|	-	Receptor that may have an important role in cell/cell signaling during nervous system formation.	Belongs to the G-protein coupled receptor 2 family. LN-TM7 subfamily.	Q9HCU4|Q5T2Y7|Q92566|	CELR2_HUMAN
O60242	ADGRB3	G-Protein Coupled Receptor	Family 2	Adhesion G protein-coupled receptor B3	-	-	1	0	-	-	-	Receptor that plays a role in the regulation of synaptogenesis and dendritic spine formation at least partly via interaction with ELMO1 and RAC1 activity (By similarity). Promotes myoblast fusion through ELMO/DOCK1 (PubMed:24567399).	Belongs to the G-protein coupled receptor 2 family. Adhesion G-protein coupled receptor (ADGR) subfamily.	O60242|B7Z1K0|O60297|Q2NKN6|Q5VY37|Q9BX54|	AGRB3_HUMAN
O95490	ADGRL2	G-Protein Coupled Receptor	Family 2	Adhesion G protein-coupled receptor L2	-	-	1	0	-	-	-	Calcium-independent receptor of low affinity for alpha- latrotoxin, an excitatory neurotoxin present in black widow spider venom which triggers massive exocytosis from neurons and neuroendocrine cells. Receptor probably implicated in the regulation of exocytosis.	Belongs to the G-protein coupled receptor 2 family. Adhesion G-protein coupled receptor (ADGR) subfamily.	O95490|A5XEI2|B1ALT8|B1ALT9|B1ALU0|B1ALU2|B1ALU4|B1ALU5|B1ALU6|O94882|Q5VX76|Q9UKY5|Q9UKY6|	AGRL2_HUMAN
Q8IZF5	ADGRF3	G-Protein Coupled Receptor	Family 2	Adhesion G-protein coupled receptor F3	-	-	1	0	-	-	-	Orphan receptor.	Belongs to the G-protein coupled receptor 2 family. Adhesion G-protein coupled receptor (ADGR) subfamily.	Q8IZF5|B4DF15|E9PEV1|Q53TA5|Q6UXT7|Q6UXX3|Q86SL7|Q8IXD8|Q8TDT3|	AGRF3_HUMAN
Q8WXG9	GPR98	G-Protein Coupled Receptor	Family 2	G-protein coupled receptor 98	25	-	1	0	-	Usher syndrome type 2|Usher Syndrome, Type II|FEBRILE CONVULSIONS, FAMILIAL, 4|Usher syndrome, type 2C|	adrenal gland glandular cells|appendix glandular cells|bronchus respiratory epithelial cells|cerebellum Purkinje cells|colon glandular cells|duodenum glandular cells|endometrium glandular cells|esophagus squamous epithelial cells|gallbladder glandular cells|kidney cells in tubules|liver hepatocytes|oral mucosa squamous epithelial cells|pancreas exocrine glandular cells|pancreas islets of Langerha…	Receptor that may have an important role in the development of the central nervous system.	Belongs to the G-protein coupled receptor 2 family. LN-TM7 subfamily.	Q8WXG9|O75171|Q8TF58|Q9H0X5|Q9UL61|	GPR98_HUMAN
Q9BY15	ADGRE3	G-Protein Coupled Receptor	Family 2	Adhesion G protein-coupled receptor E3	-	-	1	0	-	-	-	Orphan receptor that may play a role myeloid-myeloid interactions during immune and inflammatory responses. A ligand for the soluble form of this receptor is present at the surface of monocytes-derived macrophages and activated neutrophils.	Belongs to the G-protein coupled receptor 2 family. Adhesion G-protein coupled receptor (ADGR) subfamily.	Q9BY15|	AGRE3_HUMAN
P41180	CASR	G-Protein Coupled Receptor	Family 3	Extracellular calcium-sensing receptor	4	-	18	0.00117312	-	Alopecia|Anemia|Anxiety|Depressive disorder|Epilepsy|Hypercalcemia|Hyperparathyroidism|Hypoparathyroidism|Nephrocalcinosis|Pancreatitis|Tetany|Mood swings|Hyperphosphatemia (disorder)|Hypermagnesemia|Organic writer's cramp|Hyperparathyroidism, Primary|Aminoaciduria|Xerosis|Idiopathic generalized epilepsy|Hypocalciuric hypercalcemia, familial, type 1|Nephrolithiasis|Myasthenias|Familial benign hyp…	duodenum glandular cells|kidney cells in tubules|pancreas islets of Langerhans|parathyroid gland glandular cells|	G-protein-coupled receptor that senses changes in the extracellular concentration of calcium ions and plays a key role in maintaining calcium homeostasis (PubMed:7759551, PubMed:8702647, PubMed:8636323, PubMed:8878438, PubMed:17555508, PubMed:19789209, PubMed:21566075, PubMed:22114145, PubMed:23966241, PubMed:25292184, PubMed:25104082, PubMed:26386835, PubMed:25766501, PubMed:22789683). Senses fl…	Belongs to the G-protein coupled receptor 3 family.	P41180|Q13912|Q16108|Q16109|Q16110|Q16379|Q2M1T0|Q4PJ19|	CASR_HUMAN
Q14831	GRM7	G-Protein Coupled Receptor	Family 3	Metabotropic glutamate receptor 7	-	-	18	0.00023006	-	Alcoholic Intoxication, Chronic|Bipolar Disorder|Mental Depression|Depressive disorder|Schizophrenia|Unipolar Depression|Attention deficit hyperactivity disorder|Major Depressive Disorder|	-	G-protein coupled receptor for glutamate. Ligand binding causes a conformation change that triggers signaling via guanine nucleotide-binding proteins (G proteins) and modulates the activity of down-stream effectors, such as adenylate cyclase. Signaling inhibits adenylate cyclase activity.	Belongs to the G-protein coupled receptor 3 family.	Q14831|Q8NFS2|Q8NFS3|Q8NFS4|	GRM7_HUMAN
Q13255	GRM1	G-Protein Coupled Receptor	Family 3	Metabotropic glutamate receptor 1	10	-	17	0.00077887	-	Alcoholic Intoxication, Chronic|Blepharoptosis|Mental Depression|Depressive disorder|Dysarthria|Epilepsy|Epilepsy, Temporal Lobe|Esotropia|fibroma|Mental Retardation|Schizophrenia|Status Epilepticus|Unipolar Depression|Chondromyxoid fibroma|Cerebellar degeneration|Acquired flat foot|Horizontal Nystagmus|Global developmental delay|Atrophy of cerebellum|Mental deficiency|Attention deficit hyperacti…	caudate glial cells|caudate neuronal cells|cerebellum Purkinje cells|cerebellum cells in granular layer|cerebellum cells in molecular layer|cerebral cortex glial cells|cerebral cortex neuronal cells|cerebral cortex neuropil|hippocampus glial cells|hippocampus neuronal cells|	G-protein coupled receptor for glutamate. Ligand binding causes a conformation change that triggers signaling via guanine nucleotide-binding proteins (G proteins) and modulates the activity of down-stream effectors. Signaling activates a phosphatidylinositol-calcium second messenger system. May participate in the central action of glutamate in the CNS, such as long-term potentiation in the hippoc…	Belongs to the G-protein coupled receptor 3 family.	Q13255|B9EG79|F8W805|Q13256|Q14757|Q14758|Q5VTF7|Q5VTF8|Q9NU10|Q9UGS9|Q9UGT0|	GRM1_HUMAN
Q14416	GRM2	G-Protein Coupled Receptor	Family 3	Metabotropic glutamate receptor 2	5	8	16	0.00044828	-	Alcoholic Intoxication, Chronic|Epilepsy, Temporal Lobe|Psychoses, Substance-Induced|Schizophrenia|	cerebellum Purkinje cells|cerebellum cells in granular layer|cerebral cortex neuronal cells|cerebral cortex neuropil|hippocampus neuronal cells|	G-protein coupled receptor for glutamate. Ligand binding causes a conformation change that triggers signaling via guanine nucleotide-binding proteins (G proteins) and modulates the activity of down-stream effectors, such as adenylate cyclase. Signaling inhibits adenylate cyclase activity. May mediate suppression of neurotransmission or may be involved in synaptogenesis or synaptic stabilization.	Belongs to the G-protein coupled receptor 3 family.	Q14416|B0M0K7|Q14CU5|Q52MC6|Q9H3N6|	GRM2_HUMAN
Q14833	GRM4	G-Protein Coupled Receptor	Family 3	Metabotropic glutamate receptor 4	2	8	15	0.0003689	-	Alcoholic Intoxication, Chronic|Bipolar Disorder|Epilepsy, Temporal Lobe|Osteosarcoma|Schizophrenia|	cerebellum Purkinje cells|cerebral cortex neuronal cells|	G-protein coupled receptor for glutamate. Ligand binding causes a conformation change that triggers signaling via guanine nucleotide-binding proteins (G proteins) and modulates the activity of down-stream effectors. Signaling inhibits adenylate cyclase activity.	Belongs to the G-protein coupled receptor 3 family.	Q14833|B3KVL9|B7Z1T9|B7Z1U6|F5GXM5|Q5SZ84|Q6ZMQ2|	GRM4_HUMAN
Q9UBS5	GABBR1	G-Protein Coupled Receptor	Family 3	Gamma-aminobutyric acid type B receptor subunit 1	34	-	15	0.00059918	-	Alcoholic Intoxication, Chronic|Autistic Disorder|Schizophrenia|	adrenal gland glandular cells|breast glandular cells|breast myoepithelial cells|bronchus respiratory epithelial cells|caudate neuronal cells|cerebellum Purkinje cells|cerebellum cells in granular layer|cerebellum cells in molecular layer|cerebral cortex neuronal cells|cerebral cortex neuropil|cervix, uterine glandular cells|endometrium glandular cells|epididymis glandular cells|fallopian tube gla…	Component of a heterodimeric G-protein coupled receptor for GABA, formed by GABBR1 and GABBR2 (PubMed:9872316, PubMed:9872744, PubMed:15617512, PubMed:18165688, PubMed:22660477, PubMed:24305054). Within the heterodimeric GABA receptor, only GABBR1 seems to bind agonists, while GABBR2 mediates coupling to G proteins (PubMed:18165688). Ligand binding causes a conformation change that triggers signa…	Belongs to the G-protein coupled receptor 3 family. GABA-B receptor subfamily.	Q9UBS5|B0UXY7|O95375|O95468|O95975|O96022|Q5STL4|Q5SUJ8|Q5SUL3|Q71SG6|Q86W60|Q9UQQ0|	GABR1_HUMAN
O75899	GABBR2	G-Protein Coupled Receptor	Family 3	Gamma-aminobutyric acid type B receptor subunit 2	7	-	14	0.00045769	-	Autistic Disorder|Unipolar Depression|Major Depressive Disorder|	caudate neuronal cells|cerebellum Purkinje cells|cerebellum cells in granular layer|cerebral cortex neuronal cells|cerebral cortex neuropil|colon peripheral nerve/ganglion|hippocampus neuronal cells|	Component of a heterodimeric G-protein coupled receptor for GABA, formed by GABBR1 and GABBR2 (PubMed:9872316, PubMed:9872744, PubMed:15617512, PubMed:18165688, PubMed:22660477, PubMed:24305054). Within the heterodimeric GABA receptor, only GABBR1 seems to bind agonists, while GABBR2 mediates coupling to G proteins (PubMed:18165688). Ligand binding causes a conformation change that triggers signa…	Belongs to the G-protein coupled receptor 3 family. GABA-B receptor subfamily.	O75899|O75974|O75975|Q5VXZ2|Q8WX04|Q9P1R2|Q9UNR1|Q9UNS9|	GABR2_HUMAN
Q14832	GRM3	G-Protein Coupled Receptor	Family 3	Metabotropic glutamate receptor 3	-	8	11	0.00022185	-	Alcoholic Intoxication, Chronic|Bipolar Disorder|Epilepsy, Temporal Lobe|melanoma|Schizophrenia|	-	G-protein coupled receptor for glutamate. Ligand binding causes a conformation change that triggers signaling via guanine nucleotide-binding proteins (G proteins) and modulates the activity of down-stream effectors. Signaling inhibits adenylate cyclase activity.	Belongs to the G-protein coupled receptor 3 family.	Q14832|Q2PNZ6|Q75MV4|Q75N17|Q86YG6|Q8TBH9|	GRM3_HUMAN
P41594	GRM5	G-Protein Coupled Receptor	Family 3	Metabotropic glutamate receptor 5	-	-	11	0.00010948	-	Bipolar Disorder|Epilepsy, Temporal Lobe|Schizophrenia|Status Epilepticus|Unipolar Depression|Attention deficit hyperactivity disorder|Major Depressive Disorder|	-	G-protein coupled receptor for glutamate. Ligand binding causes a conformation change that triggers signaling via guanine nucleotide-binding proteins (G proteins) and modulates the activity of down-stream effectors. Signaling activates a phosphatidylinositol-calcium second messenger system and generates a calcium-activated chloride current. Plays an important role in the regulation of synaptic pl…	Belongs to the G-protein coupled receptor 3 family.	P41594|Q6J164|	GRM5_HUMAN
Q5T6X5	GPRC6A	G-Protein Coupled Receptor	Family 3	G-protein coupled receptor family C group 6 member A	-	-	11	0.00010744	-	-	-	Receptor activated by amino acids with a preference for basic amino acids such as L-Lys, L-Arg and L-ornithine but also by small and polar amino acids. The L-alpha amino acids respond is augmented by divalent cations Ca(2+) and Mg(2+). Activated by extracellular calcium and osteocalcin. Seems to act through a G(q)/G(11) and G(i)-coupled pathway. Mediates the non-genomic effects of androgens in mu…	Belongs to the G-protein coupled receptor 3 family.	Q5T6X5|Q6JK43|Q6JK44|Q8NGU8|Q8NHZ9|Q8TDT6|	GPC6A_HUMAN
O00222	GRM8	G-Protein Coupled Receptor	Family 3	Metabotropic glutamate receptor 8	-	8	10	1.635e-05	-	Alcohol Withdrawal Delirium|Alcoholic Intoxication, Chronic|Autistic Disorder|Schizophrenia|Small cell carcinoma of lung|Attention deficit hyperactivity disorder|	-	G-protein coupled receptor for glutamate. Ligand binding causes a conformation change that triggers signaling via guanine nucleotide-binding proteins (G proteins) and modulates the activity of down-stream effectors, such as adenylate cyclase. Signaling inhibits adenylate cyclase activity.	Belongs to the G-protein coupled receptor 3 family.	O00222|A4D0Y3|B0FZ74|B0M0L0|O15493|O95945|O95946|Q3MIV9|Q52M02|Q6J165|	GRM8_HUMAN
Q8NFJ5	GPRC5A	G-Protein Coupled Receptor	Family 3	Retinoic acid-induced protein 3	23	-	7	1.765e-05	-	Rheumatoid Arthritis|	appendix glandular cells|breast glandular cells|caudate neuronal cells|cerebellum Purkinje cells|cerebral cortex neuronal cells|colon glandular cells|duodenum glandular cells|endometrium glandular cells|epididymis glandular cells|hippocampus neuronal cells|kidney cells in glomeruli|kidney cells in tubules|lung macrophages|lung pneumocytes|oral mucosa squamous epithelial cells|rectum glandular cel…	Orphan receptor. Could be involved in modulating differentiation and maintaining homeostasis of epithelial cells. This retinoic acid-inducible GPCR provide evidence for a possible interaction between retinoid and G-protein signaling pathways. Functions as a negative modulator of EGFR signaling (By similarity). May act as a lung tumor suppressor (PubMed:18000218).	Belongs to the G-protein coupled receptor 3 family.	Q8NFJ5|B3KV45|O95357|	RAI3_HUMAN
Q8NFN8	GPR156	G-Protein Coupled Receptor	Family 3	Probable G-protein coupled receptor 156	-	-	6	1.555e-05	-	-	-	Orphan receptor.	Belongs to the G-protein coupled receptor 3 family. GABA-B receptor subfamily.	Q8NFN8|B7ZL66|E9PFZ4|Q14CM1|Q86SN6|	GP156_HUMAN
O15303	GRM6	G-Protein Coupled Receptor	Family 3	Metabotropic glutamate receptor 6	3	-	5	8.9e-07	-	Hemeralopia|Myopia|Night Blindness|Severe myopia|Night blindness, congenital stationary|Hypoplasia of optic disc|Oguchi disease|NIGHT BLINDNESS, CONGENITAL STATIONARY, TYPE 1B|Night blindness, stationary|Abnormality of macular pigmentation|Night blindness, congenital stationary, complete|	retina nerve fibers in inner plexiform layer|retina nerve fibers in nerve fiber layer|retina nerve fibers in outer plexiform layer |	G-protein coupled receptor for glutamate. Ligand binding causes a conformation change that triggers signaling via guanine nucleotide-binding proteins (G proteins) and modulates the activity of down-stream effectors, such as adenylate cyclase. Signaling inhibits adenylate cyclase activity (By similarity). Signaling stimulates TRPM1 channel activity and Ca(2+) uptake. Required for normal vision.	Belongs to the G-protein coupled receptor 3 family.	O15303|	GRM6_HUMAN
Q9NQ84	GPRC5C	G-Protein Coupled Receptor	Family 3	G-protein coupled receptor family C group 5 member C	36	-	5	4.098e-05	-	-	adrenal gland glandular cells|appendix glandular cells|breast glandular cells|breast myoepithelial cells|bronchus respiratory epithelial cells|cerebral cortex endothelial cells|cervix, uterine glandular cells|colon endothelial cells|colon glandular cells|duodenum glandular cells|endometrium glandular cells|epididymis glandular cells|fallopian tube glandular cells|gallbladder glandular cells|heart…	This retinoic acid-inducible G-protein coupled receptor provide evidence for a possible interaction between retinoid and G-protein signaling pathways.	Belongs to the G-protein coupled receptor 3 family.	Q9NQ84|B5BUN4|Q2NL85|Q9NZG5|	GPC5C_HUMAN
Q9NZH0	GPRC5B	G-Protein Coupled Receptor	Family 3	G-protein coupled receptor family C group 5 member B	54	-	5	0.00018593	-	-	adrenal gland glandular cells|appendix glandular cells|appendix lymphoid tissue|breast glandular cells|breast myoepithelial cells|caudate glial cells|caudate neuronal cells|cerebellum Purkinje cells|cerebellum cells in granular layer|cerebellum cells in molecular layer|cerebral cortex endothelial cells|cerebral cortex glial cells|cerebral cortex neuronal cells|cerebral cortex neuropil|colon endot…	Unknown. This retinoic acid-inducible G-protein coupled receptor provide evidence for a possible interaction between retinoid and G-protein signaling pathways.	Belongs to the G-protein coupled receptor 3 family.	Q9NZH0|D2DFB0|O75205|Q8NBZ8|	GPC5B_HUMAN
Q7RTX0	TAS1R3	G-Protein Coupled Receptor	Family 3	Taste receptor type 1 member 3	3	-	2	0	-	-	breast glandular cells|breast myoepithelial cells|salivary gland glandular cells|	Putative taste receptor. TAS1R1/TAS1R3 responds to the umami taste stimulus (the taste of monosodium glutamate). TAS1R2/TAS1R3 recognizes diverse natural and synthetic sweeteners. TAS1R3 is essential for the recognition and response to the disaccharide trehalose (By similarity). Sequence differences within and between species can significantly influence the selectivity and specificity of taste re…	Belongs to the G-protein coupled receptor 3 family. TAS1R subfamily.	Q7RTX0|Q5TA49|Q8NGW9|	TS1R3_HUMAN
Q7RTX1	TAS1R1	G-Protein Coupled Receptor	Family 3	Taste receptor type 1 member 1	65	-	1	0	-	-	adrenal gland glandular cells|appendix glandular cells|appendix lymphoid tissue|bone marrow hematopoietic cells|breast glandular cells|breast myoepithelial cells|bronchus respiratory epithelial cells|caudate glial cells|caudate neuronal cells|cerebellum Purkinje cells|cerebellum cells in granular layer|cerebellum cells in molecular layer|cerebral cortex endothelial cells|cerebral cortex glial cel…	Putative taste receptor. TAS1R1/TAS1R3 responds to the umami taste stimulus (the taste of monosodium glutamate). Sequence differences within and between species can significantly influence the selectivity and specificity of taste responses.	Belongs to the G-protein coupled receptor 3 family. TAS1R subfamily.	Q7RTX1|B2RMX0|Q5SY22|Q5SY24|Q8NGZ7|Q8TDJ7|Q8TDJ8|Q8TDJ9|Q8TDK0|	TS1R1_HUMAN
Q8TE23	TAS1R2	G-Protein Coupled Receptor	Family 3	Taste receptor type 1 member 2	-	-	1	0	-	-	-	Putative taste receptor. TAS1R2/TAS1R3 recognizes diverse natural and synthetic sweeteners.	Belongs to the G-protein coupled receptor 3 family. TAS1R subfamily.	Q8TE23|Q5TZ19|	TS1R2_HUMAN
Q99835	SMO	G-Protein Coupled Receptor	Family Fz/Smo	Smoothened homolog	54	-	15	0.00165784	-	Ameloblastoma|Blepharophimosis|Basal cell carcinoma|Congenital ocular coloboma (disorder)|Craniosynostosis|Acute Promyelocytic Leukemia|Meningioma|Mental Retardation|Microphthalmos|Syndactyly|Polydactyly of toes|Agenesis of corpus callosum|Neuroectodermal Tumor, Primitive|Syndactyly of fingers|Syndactyly of the toes|Winter Shortland Temple syndrome|Mental deficiency|Polydactyly preaxial type 1|Ba…	adrenal gland glandular cells|appendix glandular cells|bone marrow hematopoietic cells|breast adipocytes|breast myoepithelial cells|bronchus respiratory epithelial cells|caudate glial cells|caudate neuronal cells|cerebellum Purkinje cells|cerebral cortex endothelial cells|cerebral cortex glial cells|cerebral cortex neuronal cells|cerebral cortex neuropil|colon glandular cells|duodenum glandular c…	G protein-coupled receptor that probably associates with the patched protein (PTCH) to transduce the hedgehog's proteins signal. Binding of sonic hedgehog (SHH) to its receptor patched is thought to prevent normal inhibition by patched of smoothened (SMO). Required for the accumulation of KIF7, GLI2 and GLI3 in the cilia (PubMed:19592253). Interacts with DLG5 at the ciliary base to induce the acc…	Belongs to the G-protein coupled receptor Fz/Smo family.	Q99835|A4D1K5|	SMO_HUMAN
Q14332	FZD2	G-Protein Coupled Receptor	Family Fz/Smo	Frizzled-2	35	10	12	0.00365422	-	Cryptorchidism|Frontal bossing|Congenital hypoplasia of penis|Bifid scrotum|Malar flattening|Rhizomelia|Omodysplasia 2|	adrenal gland glandular cells|appendix glandular cells|bone marrow hematopoietic cells|breast myoepithelial cells|bronchus respiratory epithelial cells|colon endothelial cells|colon glandular cells|duodenum glandular cells|epididymis glandular cells|gallbladder glandular cells|heart muscle myocytes|kidney cells in glomeruli|kidney cells in tubules|liver hepatocytes|lung macrophages|lymph node ger…	Receptor for Wnt proteins. Most of frizzled receptors are coupled to the beta-catenin canonical signaling pathway, which leads to the activation of disheveled proteins, inhibition of GSK- 3 kinase, nuclear accumulation of beta-catenin and activation of Wnt target genes. A second signaling pathway involving PKC and calcium fluxes has been seen for some family members, but it is not yet clear if it…	Belongs to the G-protein coupled receptor Fz/Smo family.	Q14332|Q0VG82|	FZD2_HUMAN
Q9UP38	FZD1	G-Protein Coupled Receptor	Family Fz/Smo	Frizzled-1	67	-	6	0.00022545	-	-	adrenal gland glandular cells|appendix glandular cells|appendix lymphoid tissue|bone marrow hematopoietic cells|breast glandular cells|breast myoepithelial cells|bronchus respiratory epithelial cells|caudate glial cells|caudate neuronal cells|cerebellum Purkinje cells|cerebellum cells in granular layer|cerebellum cells in molecular layer|cerebral cortex endothelial cells|cerebral cortex glial cel…	Receptor for Wnt proteins (PubMed:10557084). Activated by WNT3A, WNT3, WNT1 and to a lesser extent WNT2, but apparently not by WNT4, WNT5A, WNT5B, WNT6, WNT7A or WNT7B (PubMed:10557084). Contradictory results showing activation by WNT7B have been described for mouse (By similarity). Functions in the canonical Wnt/beta-catenin signaling pathway (PubMed:10557084). The canonical Wnt/beta-catenin sig…	Belongs to the G-protein coupled receptor Fz/Smo family.	Q9UP38|A4D1E8|O94815|Q549T8|	FZD1_HUMAN
Q13467	FZD5	G-Protein Coupled Receptor	Family Fz/Smo	Frizzled-5	24	-	4	8.113e-05	-	Congenital ocular coloboma (disorder)|Congenital coloboma of iris|Coloboma of lens|Hereditary macular coloboma|	adrenal gland glandular cells|bone marrow hematopoietic cells|bronchus respiratory epithelial cells|caudate neuronal cells|cerebellum Purkinje cells|cerebral cortex neuronal cells|cervix, uterine glandular cells|duodenum glandular cells|endometrium glandular cells|epididymis glandular cells|hippocampus neuronal cells|pancreas exocrine glandular cells|placenta decidual cells|placenta trophoblastic…	Receptor for Wnt proteins (PubMed:9054360, PubMed:10097073, PubMed:20530549). Can activate WNT2, WNT10B, WNT5A, but not WNT2B or WNT4 (in vitro); the in vivo situation may be different since not all of these are known to be coexpressed (By similarity). In neurons, activation of WNT7A promotes formation of synapses (PubMed:20530549). Functions in the canonical Wnt/beta-catenin signaling pathway. T…	Belongs to the G-protein coupled receptor Fz/Smo family.	Q13467|A8K2X1|B2RCZ1|Q53R22|	FZD5_HUMAN
O75084	FZD7	G-Protein Coupled Receptor	Family Fz/Smo	Frizzled-7	70	-	3	5.967e-05	-	-	adrenal gland glandular cells|appendix glandular cells|appendix lymphoid tissue|bone marrow hematopoietic cells|breast glandular cells|breast myoepithelial cells|bronchus respiratory epithelial cells|caudate glial cells|caudate neuronal cells|cerebellum Purkinje cells|cerebellum cells in granular layer|cerebellum cells in molecular layer|cerebral cortex endothelial cells|cerebral cortex glial cel…	Receptor for Wnt proteins. Most of frizzled receptors are coupled to the beta-catenin canonical signaling pathway, which leads to the activation of disheveled proteins, inhibition of GSK- 3 kinase, nuclear accumulation of beta-catenin and activation of Wnt target genes. A second signaling pathway involving PKC and calcium fluxes has been seen for some family members, but it is not yet clear if it…	Belongs to the G-protein coupled receptor Fz/Smo family.	O75084|O94816|Q53S59|Q96B74|	FZD7_HUMAN
Q9ULV1	FZD4	G-Protein Coupled Receptor	Family Fz/Smo	Frizzled-4	46	-	3	2.29e-06	-	Arachnodactyly|Bipolar Disorder|Cleft Palate|Retinal Detachment|Retinopathy of Prematurity|Syndactyly|Subcapsular cataract|Persistent Hyperplastic Primary Vitreous|Blindness, Legal|Familial Exudative Vitreoretinopathy|Congenital retinal fold|Posterior Vitreous Detachment|MAJOR AFFECTIVE DISORDER 2|Exudative vitreoretinopathy 1|Exudative vitreoretinopathy|	adrenal gland glandular cells|bone marrow hematopoietic cells|breast glandular cells|breast myoepithelial cells|bronchus respiratory epithelial cells|caudate neuronal cells|cerebellum Purkinje cells|cerebellum cells in granular layer|cerebral cortex neuronal cells|cervix, uterine glandular cells|cervix, uterine squamous epithelial cells|colon glandular cells|duodenum glandular cells|esophagus squ…	Receptor for Wnt proteins. Most of frizzled receptors are coupled to the beta-catenin (CTNNB1) canonical signaling pathway, which leads to the activation of disheveled proteins, inhibition of GSK-3 kinase, nuclear accumulation of beta-catenin (CTNNB1) and activation of Wnt target genes. Plays a critical role in retinal vascularization by acting as a receptor for Wnt proteins and norrin (NDP). In …	Belongs to the G-protein coupled receptor Fz/Smo family.	Q9ULV1|A8K9Q3|Q14C97|Q6S9E4|	FZD4_HUMAN
O60353	FZD6	G-Protein Coupled Receptor	Family Fz/Smo	Frizzled-6	71	-	2	1.752e-05	-	Onycholysis|Hypertrophy of nail|NAIL DISORDER, NONSYNDROMIC CONGENITAL, 10|	adrenal gland glandular cells|appendix glandular cells|appendix lymphoid tissue|bone marrow hematopoietic cells|breast adipocytes|breast glandular cells|breast myoepithelial cells|bronchus respiratory epithelial cells|caudate neuronal cells|cerebellum Purkinje cells|cerebellum cells in granular layer|cerebellum cells in molecular layer|cerebral cortex endothelial cells|cerebral cortex glial cells…	Receptor for Wnt proteins. Most of frizzled receptors are coupled to the beta-catenin canonical signaling pathway, which leads to the activation of disheveled proteins, inhibition of GSK- 3 kinase, nuclear accumulation of beta-catenin and activation of Wnt target genes. A second signaling pathway involving PKC and calcium fluxes has been seen for some family members, but it is not yet clear if it…	Belongs to the G-protein coupled receptor Fz/Smo family.	O60353|B4DRN0|Q6N0A5|Q6P9C3|Q8WXR9|	FZD6_HUMAN
Q9NPG1	FZD3	G-Protein Coupled Receptor	Family Fz/Smo	Frizzled-3	67	-	2	8.3e-06	-	Schizophrenia|Nonorganic psychosis|	adrenal gland glandular cells|appendix glandular cells|appendix lymphoid tissue|bone marrow hematopoietic cells|breast glandular cells|breast myoepithelial cells|bronchus respiratory epithelial cells|caudate glial cells|caudate neuronal cells|cerebellum Purkinje cells|cerebral cortex glial cells|cerebral cortex neuronal cells|cervix, uterine glandular cells|cervix, uterine squamous epithelial cel…	Receptor for Wnt proteins. Most of frizzled receptors are coupled to the beta-catenin canonical signaling pathway, which leads to the activation of disheveled proteins, inhibition of GSK- 3 kinase, nuclear accumulation of beta-catenin and activation of Wnt target genes. A second signaling pathway involving PKC and calcium fluxes has been seen for some family members, but it is not yet clear if it…	Belongs to the G-protein coupled receptor Fz/Smo family.	Q9NPG1|A8K615|	FZD3_HUMAN
P51810	GPR143	G-Protein Coupled Receptor	Family O	G-protein coupled receptor 143	23	-	2	1.6e-05	-	Astigmatism|Nystagmus|Strabismus|Low Vision|Albinism, Ocular|Horizontal Nystagmus|Ocular albinism, type I|Hyperopic astigmatism|NYSTAGMUS 6, CONGENITAL, X-LINKED|Nystagmus-induced head nodding|	breast glandular cells|caudate glial cells|caudate neuronal cells|cerebral cortex glial cells|colon glandular cells|endometrium glandular cells|epididymis glandular cells|fallopian tube glandular cells|gallbladder glandular cells|hippocampus glial cells|kidney cells in tubules|placenta decidual cells|placenta trophoblastic cells|prostate glandular cells|rectum glandular cells|seminal vesicle glan…	Receptor for tyrosine, L-DOPA and dopamine. After binding to L-DOPA, stimulates Ca(2+) influx into the cytoplasm, increases secretion of the neurotrophic factor SERPINF1 and relocalizes beta arrestin at the plasma membrane; this ligand- dependent signaling occurs through a G(q)-mediated pathway in melanocytic cells. Its activity is mediated by G proteins which activate the phosphoinositide signal…	Belongs to the G-protein coupled receptor OA family.	P51810|Q6NTI7|	GP143_HUMAN
P59536	TAS2R41	G-Protein Coupled Receptor	Family T2R	Taste receptor type 2 member 41	-	2	24	0.0248526	Bottleneck	-	-	Receptor that may play a role in the perception of bitterness and is gustducin-linked. May play a role in sensing the chemical composition of the gastrointestinal content. The activity of this receptor may stimulate alpha gustducin, mediate PLC-beta-2 activation and lead to the gating of TRPM5 (By similarity).	Belongs to the G-protein coupled receptor T2R family.	P59536|P59550|Q495I2|Q50KJ5|Q50KJ6|Q50KJ7|Q645W7|	T2R41_HUMAN
P59542	TAS2R19	G-Protein Coupled Receptor	Family T2R	Taste receptor type 2 member 19	-	2	24	0.00093118	-	-	-	Receptor that may play a role in the perception of bitterness and is gustducin-linked. May play a role in sensing the chemical composition of the gastrointestinal content. The activity of this receptor may stimulate alpha gustducin, mediate PLC-beta-2 activation and lead to the gating of TRPM5 (By similarity).	Belongs to the G-protein coupled receptor T2R family.	P59542|Q3MIJ4|Q645X8|	T2R19_HUMAN
P59544	TAS2R50	G-Protein Coupled Receptor	Family T2R	Taste receptor type 2 member 50	-	2	24	0.00093118	-	-	-	Receptor that may play a role in the perception of bitterness and is gustducin-linked. May play a role in sensing the chemical composition of the gastrointestinal content. The activity of this receptor may stimulate alpha gustducin, mediate PLC-beta-2 activation and lead to the gating of TRPM5 (By similarity).	Belongs to the G-protein coupled receptor T2R family.	P59544|P59545|Q2M255|Q645Y0|	T2R50_HUMAN
Q9NYV7	TAS2R16	G-Protein Coupled Receptor	Family T2R	Taste receptor type 2 member 16	-	2	24	0.00093118	-	Alcoholic Intoxication, Chronic|	-	Gustducin-coupled receptor implicated in the perception of bitter compounds in the oral cavity and the gastrointestinal tract. Signals through PLCB2 and the calcium-regulated cation channel TRPM5.	Belongs to the G-protein coupled receptor T2R family.	Q9NYV7|A4D0X2|Q502V3|Q549U8|Q645W1|	T2R16_HUMAN
P59533	TAS2R38	G-Protein Coupled Receptor	Family T2R	Taste receptor type 2 member 38	25	2	23	0.0001299	-	Alcoholic Intoxication, Chronic|	appendix glandular cells|bone marrow hematopoietic cells|breast glandular cells|bronchus respiratory epithelial cells|cerebral cortex neuropil|cervix, uterine glandular cells|colon glandular cells|epididymis glandular cells|esophagus squamous epithelial cells|fallopian tube glandular cells|gallbladder glandular cells|heart muscle myocytes|kidney cells in tubules|liver bile duct cells|nasopharynx …	Receptor that may play a role in the perception of bitterness and is gustducin-linked. May play a role in sensing the chemical composition of the gastrointestinal content. The activity of this receptor may stimulate alpha gustducin, mediate PLC-beta-2 activation and lead to the gating of TRPM5 (By similarity).	Belongs to the G-protein coupled receptor T2R family.	P59533|A4D1U6|P59552|Q2M3E8|Q645W3|Q86UK3|	T2R38_HUMAN
P59534	TAS2R39	G-Protein Coupled Receptor	Family T2R	Taste receptor type 2 member 39	6	2	23	0.0001299	-	-	appendix lymphoid tissue|lymph node germinal center cells|lymph node non-germinal center cells|spleen cells in white pulp|tonsil germinal center cells|tonsil non-germinal center cells|	Receptor that may play a role in the perception of bitterness and is gustducin-linked. May play a role in sensing the chemical composition of the gastrointestinal content. The activity of this receptor may stimulate alpha gustducin, mediate PLC-beta-2 activation and lead to the gating of TRPM5 (By similarity).	Belongs to the G-protein coupled receptor T2R family.	P59534|A4FUI7|Q3ZCN6|Q645W4|	T2R39_HUMAN
P59537	TAS2R43	G-Protein Coupled Receptor	Family T2R	Taste receptor type 2 member 43	-	2	23	0.0001299	-	-	-	Gustducin-coupled receptor immplicated in the perception of bitter compounds in the oral cavity and the gastrointestinal tract. Signals through PLCB2 and the calcium-regulated cation channel TRPM5. Activated by the sulfonyl amide sweeteners saccharin and acesulfame K. In airway epithelial cells, binding of bitter compounds increases the intracellular calcium ion concentration and stimulates cilia…	Belongs to the G-protein coupled receptor T2R family.	P59537|P59546|Q645X4|	T2R43_HUMAN
P59538	TAS2R31	G-Protein Coupled Receptor	Family T2R	Taste receptor type 2 member 31	-	2	23	0.0001299	-	-	-	Receptor that may play a role in the perception of bitterness and is gustducin-linked. May play a role in sensing the chemical composition of the gastrointestinal content. The activity of this receptor may stimulate alpha gustducin, mediate PLC-beta-2 activation and lead to the gating of TRPM5 (By similarity). Activated by the sulfonyl amide sweeteners saccharin and acesulfame K.	Belongs to the G-protein coupled receptor T2R family.	P59538|P59547|Q17R84|Q645X5|	T2R31_HUMAN
P59540	TAS2R46	G-Protein Coupled Receptor	Family T2R	Taste receptor type 2 member 46	-	2	23	0.0001299	-	-	-	Receptor that may play a role in the perception of bitterness and is gustducin-linked. May play a role in sensing the chemical composition of the gastrointestinal content. The activity of this receptor may stimulate alpha gustducin, mediate PLC-beta-2 activation and lead to the gating of TRPM5 (By similarity). In airway epithelial cells, binding of bitter compounds increases the intracellular cal…	Belongs to the G-protein coupled receptor T2R family.	P59540|P59548|Q645X6|	T2R46_HUMAN
P59543	TAS2R20	G-Protein Coupled Receptor	Family T2R	Taste receptor type 2 member 20	-	2	23	0.0001299	-	-	-	Receptor that may play a role in the perception of bitterness and is gustducin-linked. May play a role in sensing the chemical composition of the gastrointestinal content. The activity of this receptor may stimulate alpha gustducin, mediate PLC-beta-2 activation and lead to the gating of TRPM5 (By similarity).	Belongs to the G-protein coupled receptor T2R family.	P59543|P59549|Q2HIZ4|Q496D8|Q645X9|	T2R20_HUMAN
P59551	TAS2R60	G-Protein Coupled Receptor	Family T2R	Taste receptor type 2 member 60	-	2	23	0.0001299	-	melanoma|	-	Receptor that may play a role in the perception of bitterness and is gustducin-linked. May play a role in sensing the chemical composition of the gastrointestinal content. The activity of this receptor may stimulate alpha gustducin, mediate PLC-beta-2 activation and lead to the gating of TRPM5 (By similarity).	Belongs to the G-protein coupled receptor T2R family.	P59551|A4D2G8|Q645W8|Q7RTR7|	T2R60_HUMAN
Q7RTR8	TAS2R42	G-Protein Coupled Receptor	Family T2R	Taste receptor type 2 member 42	-	2	23	0.0001299	-	-	-	Receptor that may play a role in the perception of bitterness and is gustducin-linked. May play a role in sensing the chemical composition of the gastrointestinal content. The activity of this receptor may stimulate alpha gustducin, mediate PLC-beta-2 activation and lead to the gating of TRPM5 (By similarity).	Belongs to the G-protein coupled receptor T2R family.	Q7RTR8|A2RRP4|Q645X0|	T2R42_HUMAN
Q9NYV8	TAS2R14	G-Protein Coupled Receptor	Family T2R	Taste receptor type 2 member 14	-	2	23	0.0001299	-	-	-	Receptor that may play a role in the perception of bitterness and is gustducin-linked. May play a role in sensing the chemical composition of the gastrointestinal content. The activity of this receptor may stimulate alpha gustducin, mediate PLC-beta-2 activation and lead to the gating of TRPM5 (By similarity).	Belongs to the G-protein coupled receptor T2R family.	Q9NYV8|Q645X3|	T2R14_HUMAN
Q9NYW4	TAS2R5	G-Protein Coupled Receptor	Family T2R	Taste receptor type 2 member 5	-	2	23	0.0001299	-	-	-	Receptor that may play a role in the perception of bitterness and is gustducin-linked. May play a role in sensing the chemical composition of the gastrointestinal content. The activity of this receptor may stimulate alpha gustducin, mediate PLC-beta-2 activation and lead to the gating of TRPM5.	Belongs to the G-protein coupled receptor T2R family.	Q9NYW4|Q645W0|Q75MV7|	TA2R5_HUMAN
Q9NYW6	TAS2R3	G-Protein Coupled Receptor	Family T2R	Taste receptor type 2 member 3	-	2	23	0.0001299	-	-	-	Gustducin-coupled receptor implicated in the perception of bitter compounds in the oral cavity and the gastrointestinal tract. Signals through PLCB2 and the calcium-regulated cation channel TRPM5.	Belongs to the G-protein coupled receptor T2R family.	Q9NYW6|A4D1U2|Q645W2|Q75MV6|	TA2R3_HUMAN
P59535	TAS2R40	G-Protein Coupled Receptor	Family T2R	Taste receptor type 2 member 40	-	2	22	9.198e-05	-	-	-	Gustducin-coupled receptor implicated in the perception of bitter compounds in the oral cavity and the gastrointestinal tract. Signals through PLCB2 and the calcium-regulated cation channel TRPM5.	Belongs to the G-protein coupled receptor T2R family.	P59535|A4D2I2|Q645W6|	T2R40_HUMAN
P59541	TAS2R30	G-Protein Coupled Receptor	Family T2R	Taste receptor type 2 member 30	-	2	22	9.198e-05	-	-	-	Receptor that may play a role in the perception of bitterness and is gustducin-linked. May play a role in sensing the chemical composition of the gastrointestinal content. The activity of this receptor may stimulate alpha gustducin, mediate PLC-beta-2 activation and lead to the gating of TRPM5 (By similarity).	Belongs to the G-protein coupled receptor T2R family.	P59541|Q645X7|	T2R30_HUMAN
Q9NYW0	TAS2R10	G-Protein Coupled Receptor	Family T2R	Taste receptor type 2 member 10	-	2	22	9.198e-05	-	-	-	Gustducin-coupled strychnine receptor implicated in the perception of bitter compounds in the oral cavity and the gastrointestinal tract. Signals through PLCB2 and the calcium- regulated cation channel TRPM5.	Belongs to the G-protein coupled receptor T2R family.	Q9NYW0|Q3MIM9|Q6NTD9|	T2R10_HUMAN
Q9NYW7	TAS2R1	G-Protein Coupled Receptor	Family T2R	Taste receptor type 2 member 1	-	2	22	9.198e-05	-	-	-	Receptor that may play a role in the perception of bitterness and is gustducin-linked. May play a role in sensing the chemical composition of the gastrointestinal content. The activity of this receptor may stimulate alpha gustducin, mediate PLC-beta-2 activation and lead to the gating of TRPM5.	Belongs to the G-protein coupled receptor T2R family.	Q9NYW7|Q646G8|	TA2R1_HUMAN
Q9NYV9	TAS2R13	G-Protein Coupled Receptor	Family T2R	Taste receptor type 2 member 13	-	2	21	6.5e-07	-	alcohol use disorder|	-	Receptor that may play a role in the perception of bitterness and is gustducin-linked. May play a role in sensing the chemical composition of the gastrointestinal content. The activity of this receptor may stimulate alpha gustducin, mediate PLC-beta-2 activation and lead to the gating of TRPM5.	Belongs to the G-protein coupled receptor T2R family.	Q9NYV9|Q4G0I5|Q502V8|Q645X2|	T2R13_HUMAN
Q9NYW2	TAS2R8	G-Protein Coupled Receptor	Family T2R	Taste receptor type 2 member 8	-	2	21	6.5e-07	-	-	-	Receptor that may play a role in the perception of bitterness and is gustducin-linked. May play a role in sensing the chemical composition of the gastrointestinal content. The activity of this receptor may stimulate alpha gustducin, mediate PLC-beta-2 activation and lead to the gating of TRPM5.	Belongs to the G-protein coupled receptor T2R family.	Q9NYW2|Q4KN29|Q645Y2|	TA2R8_HUMAN
Q9NYW3	TAS2R7	G-Protein Coupled Receptor	Family T2R	Taste receptor type 2 member 7	-	2	21	0.029545	Bottleneck	-	-	Gustducin-coupled receptor implicated in the perception of bitter compounds in the oral cavity and the gastrointestinal tract. Signals through PLCB2 and the calcium-regulated cation channel TRPM5.	Belongs to the G-protein coupled receptor T2R family.	Q9NYW3|Q645Y1|	TA2R7_HUMAN
Q9NYW1	TAS2R9	G-Protein Coupled Receptor	Family T2R	Taste receptor type 2 member 9	-	2	20	6.5e-07	-	-	-	Gustducin-coupled receptor implicated in the perception of bitter compounds in the oral cavity and the gastrointestinal tract. Signals through PLCB2 and the calcium-regulated cation channel TRPM5 (By similarity).	Belongs to the G-protein coupled receptor T2R family.	Q9NYW1|Q502V7|Q50KT0|Q50KT1|Q645W9|	TA2R9_HUMAN
P59539	TAS2R45	G-Protein Coupled Receptor	Family T2R	Taste receptor type 2 member 45	-	2	18	2.9e-07	-	-	-	Receptor that may play a role in the perception of bitterness and is gustducin-linked. May play a role in sensing the chemical composition of the gastrointestinal content. The activity of this receptor may stimulate alpha gustducin, mediate PLC-beta-2 activation and lead to the gating of TRPM5 (By similarity).	Belongs to the G-protein coupled receptor T2R family.	P59539|	T2R45_HUMAN
Q9NYW5	TAS2R4	G-Protein Coupled Receptor	Family T2R	Taste receptor type 2 member 4	-	-	3	0	-	-	-	Gustducin-coupled receptor for denatonium and N(6)- propyl-2-thiouracil implicated in the perception of bitter compounds in the oral cavity and the gastrointestinal tract. Signals through PLCB2 and the calcium-regulated cation channel TRPM5. In airway epithelial cells, binding of denatonium increases the intracellular calcium ion concentration and stimulates ciliary beat frequency.	Belongs to the G-protein coupled receptor T2R family.	Q9NYW5|Q645W5|Q75MV8|	TA2R4_HUMAN
O43306	ADCY6	Gα effector	Adenylate cyclase	Adenylate cyclase type 6	55	-	9	0.00020602	-	Arthrogryposis|LETHAL CONGENITAL CONTRACTURE SYNDROME 8|	adrenal gland glandular cells|appendix glandular cells|bone marrow hematopoietic cells|breast glandular cells|bronchus respiratory epithelial cells|caudate glial cells|cerebellum Purkinje cells|cerebellum cells in granular layer|cerebellum cells in molecular layer|cerebral cortex endothelial cells|cerebral cortex glial cells|cerebral cortex neuronal cells|cerebral cortex neuropil|cervix, uterine …	Catalyzes the formation of the signaling molecule cAMP downstream of G protein-coupled receptors (PubMed:17916776, PubMed:17110384). Functions in signaling cascades downstream of beta-adrenergic receptors in the heart and in vascular smooth muscle cells (PubMed:17916776). Functions in signaling cascades downstream of the vasopressin receptor in the kidney and has a role in renal water reabsorptio…	Belongs to the adenylyl cyclase class-4/guanylyl cyclase family.	O43306|Q9NR75|Q9UDB0|	ADCY6_HUMAN
O95622	ADCY5	Gα effector	Adenylate cyclase	Adenylate cyclase type 5	-	-	8	0.00022054	-	Alcoholic Intoxication, Chronic|Anxiety|Mental Depression|Depressive disorder|Diabetes Mellitus, Non-Insulin-Dependent|Dysarthria|Dyskinetic syndrome|Osteoporosis|Unipolar Depression|Benign Hereditary Chorea|Major Depressive Disorder|Dyskinesia, Familial, with Facial Myokymia|Choreatic disease|Dystonic disease|Anxiety disease|	-	Catalyzes the formation of the signaling molecule cAMP in response to G-protein signaling (PubMed:15385642, PubMed:26206488, PubMed:24700542). Mediates signaling downstream of ADRB1 (PubMed:24700542). Regulates the increase of free cytosolic Ca(2+) in response to increased blood glucose levels and contributes to the regulation of Ca(2+)-dependent insulin secretion (PubMed:24740569).	Belongs to the adenylyl cyclase class-4/guanylyl cyclase family.	O95622|B7Z8A6|Q7RTV7|Q8NFM3|	ADCY5_HUMAN
Q08828	ADCY1	Gα effector	Adenylate cyclase	Adenylate cyclase type 1	-	-	8	0.00052867	-	Substance Withdrawal Syndrome|Small cell carcinoma of lung|Prelingual sensorineural hearing impairment|	-	Catalyzes the formation of the signaling molecule cAMP in response to G-protein signaling. Mediates responses to increased cellular Ca(2+)/calmodulin levels (By similarity). May be involved in regulatory processes in the central nervous system. May play a role in memory and learning. Plays a role in the regulation of the circadian rhythm of daytime contrast sensitivity probably by modulating the …	Belongs to the adenylyl cyclase class-4/guanylyl cyclase family.	Q08828|A4D2L8|Q75MI1|	ADCY1_HUMAN
O60266	ADCY3	Gα effector	Adenylate cyclase	Adenylate cyclase type 3	54	-	5	0.00013806	-	Bipolar Disorder|Diabetic Angiopathies|	adrenal gland glandular cells|appendix glandular cells|breast glandular cells|breast myoepithelial cells|bronchus respiratory epithelial cells|caudate neuronal cells|cerebellum Purkinje cells|cerebral cortex endothelial cells|cerebral cortex glial cells|cerebral cortex neuronal cells|cervix, uterine glandular cells|cervix, uterine squamous epithelial cells|colon endothelial cells|colon glandular …	Catalyzes the formation of the signaling molecule cAMP in response to G-protein signaling. Participates in signaling cascades triggered by odorant receptors via its function in cAMP biosynthesis. Required for the perception of odorants. Required for normal sperm motility and normal male fertility. Plays a role in regulating insulin levels and body fat accumulation in response to a high fat diet.	Belongs to the adenylyl cyclase class-4/guanylyl cyclase family.	O60266|B3KT86|Q53T54|Q9UDB1|	ADCY3_HUMAN
Q08462	ADCY2	Gα effector	Adenylate cyclase	Adenylate cyclase type 2	44	-	5	4.022e-05	-	Asthma|Bipolar Disorder|	adrenal gland glandular cells|breast adipocytes|breast glandular cells|breast myoepithelial cells|bronchus respiratory epithelial cells|caudate glial cells|caudate neuronal cells|cerebellum Purkinje cells|cerebellum cells in granular layer|cerebral cortex endothelial cells|cerebral cortex glial cells|cerebral cortex neuropil|cervix, uterine glandular cells|colon endothelial cells|colon glandular …	Catalyzes the formation of the signaling molecule cAMP in response to G-protein signaling (PubMed:15385642). Down-stream signaling cascades mediate changes in gene expression patterns and lead to increased IL6 production. Functions in signaling cascades downstream of the muscarinic acetylcholine receptors (By similarity).	Belongs to the adenylyl cyclase class-4/guanylyl cyclase family.	Q08462|B7Z2C1|Q2NKL8|Q9UDB2|Q9UPU2|	ADCY2_HUMAN
O60503	ADCY9	Gα effector	Adenylate cyclase	Adenylate cyclase type 9	56	-	4	0.00032003	-	-	adrenal gland glandular cells|appendix glandular cells|bone marrow hematopoietic cells|breast glandular cells|breast myoepithelial cells|bronchus respiratory epithelial cells|caudate glial cells|caudate neuronal cells|cerebellum Purkinje cells|cerebellum cells in granular layer|cerebellum cells in molecular layer|cerebral cortex glial cells|cerebral cortex neuronal cells|cervix, uterine glandular…	Adenylyl cyclase that catalyzes the formation of the signaling molecule cAMP in response to activation of G protein- coupled receptors (PubMed:9628827, PubMed:12972952, PubMed:15879435, PubMed:10987815). Contributes to signaling cascades activated by CRH (corticotropin-releasing factor), corticosteroids and beta-adrenergic receptors (PubMed:9628827).	Belongs to the adenylyl cyclase class-4/guanylyl cyclase family.	O60503|A7E2V5|A7E2X2|D3DUD1|O60273|Q4ZHT9|Q4ZIR5|Q9BWT4|Q9UGP2|	ADCY9_HUMAN
P40145	ADCY8	Gα effector	Adenylate cyclase	Adenylate cyclase type 8	58	-	4	2.698e-05	-	Bipolar Disorder|Mental Depression|Depressive disorder|Diabetic Angiopathies|Substance Withdrawal Syndrome|	adrenal gland glandular cells|appendix glandular cells|appendix lymphoid tissue|bone marrow hematopoietic cells|breast glandular cells|breast myoepithelial cells|bronchus respiratory epithelial cells|caudate neuronal cells|cerebellum Purkinje cells|cerebellum cells in granular layer|cerebellum cells in molecular layer|cerebral cortex endothelial cells|cerebral cortex neuronal cells|cervix, uterin…	This is a membrane-bound, calcium-stimulable adenylyl cyclase. May be involved in learning, in memory and in drug dependence (By similarity).	Belongs to the adenylyl cyclase class-4/guanylyl cyclase family.	P40145|	ADCY8_HUMAN
P51828	ADCY7	Gα effector	Adenylate cyclase	Adenylate cyclase type 7	28	-	3	4.454e-05	-	Alcoholic Intoxication, Chronic|Mental Depression|Depressive disorder|Leukemia, Myelocytic, Acute|Schizophrenia|Unipolar Depression|Major Depressive Disorder|Juvenile arthritis|	adrenal gland glandular cells|bone marrow hematopoietic cells|breast glandular cells|breast myoepithelial cells|bronchus respiratory epithelial cells|cerebellum Purkinje cells|cerebral cortex neuronal cells|cerebral cortex neuropil|cervix, uterine squamous epithelial cells|colon peripheral nerve/ganglion|duodenum glandular cells|endometrium glandular cells|epididymis glandular cells|esophagus squ…	Catalyzes the formation of cAMP in response to activation of G protein-coupled receptors (Probable). Functions in signaling cascades activated namely by thrombin and sphingosine 1- phosphate and mediates regulation of cAMP synthesis through synergistic action of the stimulatory G alpha protein with GNA13 (PubMed:23229509, PubMed:18541530). Also, during inflammation, mediates zymosan-induced incre…	Belongs to the adenylyl cyclase class-4/guanylyl cyclase family.	P51828|A0AVA6|	ADCY7_HUMAN
Q8NFM4	ADCY4	Gα effector	Adenylate cyclase	Adenylate cyclase type 4	64	-	2	7e-08	-	-	adrenal gland glandular cells|appendix glandular cells|bone marrow hematopoietic cells|breast glandular cells|breast myoepithelial cells|bronchus respiratory epithelial cells|caudate glial cells|caudate neuronal cells|cerebellum Purkinje cells|cerebellum cells in granular layer|cerebellum cells in molecular layer|cerebral cortex endothelial cells|cerebral cortex neuronal cells|cerebral cortex neu…	Catalyzes the formation of the signaling molecule cAMP in response to G-protein signaling.	Belongs to the adenylyl cyclase class-4/guanylyl cyclase family.	Q8NFM4|B3KV74|D3DS75|Q17R40|Q6ZTM6|Q96ML7|	ADCY4_HUMAN
P12830	CDH1	Gα effector	Cadherins	Cadherin-1	37	9	90	0.00948088	-	Bladder Neoplasm|Squamous cell carcinoma|Ulcerative Colitis|Adenoid Cystic Carcinoma|Dysgerminoma|Gastritis, Atrophic|Mesothelioma|Pancreatic Neoplasm|Cleft palate with cleft lip|Carcinoma, Lobular|Prostatic Intraepithelial Neoplasias|Endometrial Carcinoma|Breast Carcinoma|Stomach Carcinoma|ovarian neoplasm|Invasive Ductal Breast Carcinoma|Hereditary Diffuse Gastric Cancer|Prostate cancer, famili…	appendix glandular cells|breast glandular cells|breast myoepithelial cells|bronchus respiratory epithelial cells|cervix, uterine glandular cells|cervix, uterine squamous epithelial cells|colon glandular cells|duodenum glandular cells|endometrium glandular cells|epididymis glandular cells|esophagus squamous epithelial cells|fallopian tube glandular cells|gallbladder glandular cells|kidney cells in…	Cadherins are calcium-dependent cell adhesion proteins (PubMed:11976333). They preferentially interact with themselves in a homophilic manner in connecting cells; cadherins may thus contribute to the sorting of heterogeneous cell types. CDH1 is involved in mechanisms regulating cell-cell adhesions, mobility and proliferation of epithelial cells (PubMed:11976333). Has a potent invasive suppressor …		P12830|A8K1U7|Q13799|Q14216|Q15855|Q16194|Q4PJ14|Q9UII8|	CADH1_HUMAN
Q7Z2K8	GPRIN1	Gα effector	G-protein-regulated inducers of neurite outgrowth	G protein-regulated inducer of neurite outgrowth 1	15	-	7	0.00015762	-	-	adrenal gland glandular cells|caudate neuronal cells|cerebellum cells in granular layer|cerebellum cells in molecular layer|cerebral cortex glial cells|cerebral cortex neuronal cells|cerebral cortex neuropil|cervix, uterine glandular cells|colon peripheral nerve/ganglion|endometrium glandular cells|hippocampus glial cells|hippocampus neuronal cells|ovary follicle cells|pancreas islets of Langerha…	May be involved in neurite outgrowth.		Q7Z2K8|C9JM70|Q8ND74|Q96PZ4|	GRIN1_HUMAN
O60269	GPRIN2	Gα effector	G-protein-regulated inducers of neurite outgrowth	G protein-regulated inducer of neurite outgrowth 2	66	-	6	0.00011957	-	Bipolar Disorder|	adrenal gland glandular cells|appendix glandular cells|appendix lymphoid tissue|bone marrow hematopoietic cells|breast glandular cells|breast myoepithelial cells|bronchus respiratory epithelial cells|caudate glial cells|caudate neuronal cells|cerebellum Purkinje cells|cerebellum cells in granular layer|cerebellum cells in molecular layer|cerebral cortex endothelial cells|cerebral cortex glial cel…	May be involved in neurite outgrowth.		O60269|Q5SVF0|	GRIN2_HUMAN
P47736	RAP1GAP	Gα effector	GTPase activating proteins	Rap1 GTPase-activating protein 1	31	-	8	0.00029162	-	Acute Promyelocytic Leukemia|melanoma|Pancreatic Neoplasm|Thyroid Neoplasm|	adrenal gland glandular cells|appendix glandular cells|caudate neuronal cells|cerebellum Purkinje cells|cerebellum cells in molecular layer|cerebral cortex neuronal cells|cerebral cortex neuropil|cervix, uterine glandular cells|colon glandular cells|duodenum glandular cells|endometrium glandular cells|epididymis glandular cells|fallopian tube glandular cells|gallbladder glandular cells|hippocampu…	GTPase activator for the nuclear Ras-related regulatory protein RAP-1A (KREV-1), converting it to the putatively inactive GDP-bound state.		P47736|J3QSS6|O75062|Q5T3S9|Q5T3T4|Q7Z5S8|Q9UQ51|	RPGP1_HUMAN
Q684P5	RAP1GAP2	Gα effector	GTPase activating proteins	Rap1 GTPase-activating protein 2	71	-	5	2.327e-05	-	-	adrenal gland glandular cells|appendix glandular cells|appendix lymphoid tissue|bone marrow hematopoietic cells|breast adipocytes|breast glandular cells|breast myoepithelial cells|bronchus respiratory epithelial cells|caudate glial cells|caudate neuronal cells|cerebellum Purkinje cells|cerebellum cells in granular layer|cerebellum cells in molecular layer|cerebral cortex endothelial cells|cerebra…	GTPase activator for the nuclear Ras-related regulatory protein RAP-1A (KREV-1), converting it to the putatively inactive GDP-bound state.		Q684P5|B2RTY5|Q684P4|Q6AI00|Q6ZVF0|Q9UPW2|	RPGP2_HUMAN
Q12802	AKAP13	Gα effector	Guanine nucleotide exchange factors	A-kinase anchor protein 13	69	-	12	0.00024514	-	Renal Cell Carcinoma|	adrenal gland glandular cells|appendix glandular cells|appendix lymphoid tissue|bone marrow hematopoietic cells|breast adipocytes|breast glandular cells|breast myoepithelial cells|bronchus respiratory epithelial cells|caudate glial cells|caudate neuronal cells|cerebral cortex endothelial cells|cerebral cortex glial cells|cerebral cortex neuronal cells|cerebral cortex neuropil|cervix, uterine squa…	Scaffold protein that plays an important role in assembling signaling complexes downstream of several types of G protein-coupled receptors. Activates RHOA in response to signaling via G protein-coupled receptors via its function as Rho guanine nucleotide exchange factor (PubMed:11546812, PubMed:15229649, PubMed:23090968, PubMed:25186459, PubMed:24993829). May also activate other Rho family member…		Q12802|Q14572|Q59FP6|Q86W90|Q8WXQ6|Q96JP6|Q96P79|Q9Y5T0|Q9Y5T6|	AKP13_HUMAN
Q9NPQ8	RIC8A	Gα effector	Guanine nucleotide exchange factors	Synembryn-A	48	-	9	0.0005147	-	-	adrenal gland glandular cells|appendix glandular cells|appendix lymphoid tissue|breast glandular cells|breast myoepithelial cells|bronchus respiratory epithelial cells|cervix, uterine glandular cells|colon endothelial cells|colon glandular cells|colon peripheral nerve/ganglion|duodenum glandular cells|endometrium cells in endometrial stroma|endometrium glandular cells|epididymis glandular cells|e…	Guanine nucleotide exchange factor (GEF), which can activate some, but not all, G-alpha proteins. Able to activate GNAI1, GNAO1 and GNAQ, but not GNAS by exchanging bound GDP for free GTP. Involved in regulation of microtubule pulling forces during mitotic movement of chromosomes by stimulating G(i)-alpha protein, possibly leading to release G(i)-alpha-GTP and NuMA proteins from the NuMA-GPSM2-G(…	Belongs to the synembryn family.	Q9NPQ8|Q0P508|Q2T9J1|Q7Z352|Q96EZ1|Q96SZ2|Q9H064|Q9H5H3|Q9H9E7|	RIC8A_HUMAN
Q92888	ARHGEF1	Gα effector	Guanine nucleotide exchange factors	Rho guanine nucleotide exchange factor 1	39	-	8	0.00035778	-	-	appendix glandular cells|appendix lymphoid tissue|bone marrow hematopoietic cells|breast glandular cells|bronchus respiratory epithelial cells|cervix, uterine squamous epithelial cells|colon endothelial cells|colon glandular cells|colon peripheral nerve/ganglion|duodenum glandular cells|endometrium glandular cells|epididymis glandular cells|esophagus squamous epithelial cells|fallopian tube gland…	Seems to play a role in the regulation of RhoA GTPase by guanine nucleotide-binding alpha-12 (GNA12) and alpha-13 (GNA13) subunits. Acts as GTPase-activating protein (GAP) for GNA12 and GNA13, and as guanine nucleotide exchange factor (GEF) for RhoA GTPase. Activated G alpha 13/GNA13 stimulates the RhoGEF activity through interaction with the RGS-like domain. This GEF activity is inhibited by bin…		Q92888|O00513|Q6NX52|Q8N4J4|Q96BF4|Q96F17|Q9BSB1|	ARHG1_HUMAN
O00555	CACNA1A	Gα effector	Ion channels	Voltage-dependent P/Q-type calcium channel subunit alpha-1A	4	-	13	0.00209836	-	Anxiety|Bipolar Disorder|Dysarthria|Absence Epilepsy|Nystagmus|Ataxia, Spinocerebellar|Sensory neuropathy|Migraine with Aura|Exfoliation Syndrome|Cerebellar degeneration|Nystagmus, End-Position|Alternating hemiplegia of childhood|Hemiplegia and hemiparesis|Progressive cerebellar ataxia|Atrophy of cerebellum|Intermittent migraine headaches|Spinocerebellar Ataxia Type 6 (disorder)|Dysphasia|Develop…	caudate glial cells|cerebral cortex glial cells|cerebral cortex neuropil|hippocampus glial cells|	Voltage-sensitive calcium channels (VSCC) mediate the entry of calcium ions into excitable cells and are also involved in a variety of calcium-dependent processes, including muscle contraction, hormone or neurotransmitter release, gene expression, cell motility, cell division and cell death. The isoform alpha-1A gives rise to P and/or Q-type calcium currents. P/Q-type calcium channels belong to t…	Belongs to the calcium channel alpha-1 subunit (TC 1.A.1.11) family. CACNA1A subfamily.	O00555|J3KP41|P78510|P78511|Q16290|Q92690|Q99790|Q99791|Q99792|Q99793|Q9NS88|Q9UDC4|	CAC1A_HUMAN
Q00975	CACNA1B	Gα effector	Ion channels	Voltage-dependent N-type calcium channel subunit alpha-1B	43	-	5	7.549e-05	-	Bipolar Disorder|Schizophrenia|Organic writer's cramp|DYSTONIA 23|	adrenal gland glandular cells|appendix glandular cells|bone marrow hematopoietic cells|bronchus respiratory epithelial cells|caudate glial cells|caudate neuronal cells|cerebral cortex glial cells|cerebral cortex neuropil|colon endothelial cells|colon glandular cells|colon peripheral nerve/ganglion|duodenum glandular cells|endometrium glandular cells|esophagus squamous epithelial cells|fallopian t…	Voltage-sensitive calcium channels (VSCC) mediate the entry of calcium ions into excitable cells and are also involved in a variety of calcium-dependent processes, including muscle contraction, hormone or neurotransmitter release, gene expression, cell motility, cell division and cell death. The isoform alpha-1B gives rise to N-type calcium currents. N-type calcium channels belong to the 'high-vo…	Belongs to the calcium channel alpha-1 subunit (TC 1.A.1.11) family. CACNA1B subfamily.	Q00975|B1AQK5|	CAC1B_HUMAN
Q15878	CACNA1E	Gα effector	Ion channels	Voltage-dependent R-type calcium channel subunit alpha-1E	-	-	2	4.36e-06	-	-	-	Voltage-sensitive calcium channels (VSCC) mediate the entry of calcium ions into excitable cells and are also involved in a variety of calcium-dependent processes, including muscle contraction, hormone or neurotransmitter release, gene expression, cell motility, cell division and cell death. The isoform alpha-1E gives rise to R-type calcium currents. R-type calcium channels belong to the 'high-vo…	Belongs to the calcium channel alpha-1 subunit (TC 1.A.1.11) family. CACNA1E subfamily.	Q15878|B1AM12|B1AM13|B1AM14|Q14580|Q14581|	CAC1E_HUMAN
P18545	PDE6G	Gα effector	Phosphodiesterase	Retinal rod rhodopsin-sensitive cGMP 3',5'-cyclic phosphodiesterase subunit gamma	1	-	7	0.00062344	-	Glaucoma|Conductive hearing loss|Sensorineural Hearing Loss (disorder)|Hyperinsulinism|Hypogonadism|Keratoconus|Macular Edema, Cystoid|Mental Retardation|Night Blindness|Nystagmus|Obesity|Optic Atrophy|Retinitis Pigmentosa|Cataract|Congenital hypoplasia of penis|Blindness, Legal|Mental deficiency|RETINITIS PIGMENTOSA 57|Abnormality of the retinal vasculature|	retina cells in photoreceptor layer |	Participates in processes of transmission and amplification of the visual signal. cGMP-PDEs are the effector molecules in G-protein-mediated phototransduction in vertebrate rods and cones.	Belongs to the rod/cone cGMP-PDE gamma subunit family.	P18545|Q3KP63|Q7Z3U8|	CNRG_HUMAN
O43924	PDE6D	Gα effector	Phosphodiesterase	Retinal rod rhodopsin-sensitive cGMP 3',5'-cyclic phosphodiesterase subunit delta	64	10	6	0.00037198	-	Congenital ocular coloboma (disorder)|Microphthalmos|Retinal Dysplasia|Syndactyly|Congenital hypoplasia of kidney|Ulnar polydactyly of fingers|Global developmental delay|facial deformity|OROFACIODIGITAL SYNDROME VI|Abnormally small eyeball|	adrenal gland glandular cells|appendix glandular cells|bone marrow hematopoietic cells|breast glandular cells|breast myoepithelial cells|bronchus respiratory epithelial cells|caudate glial cells|caudate neuronal cells|cerebellum Purkinje cells|cerebellum cells in granular layer|cerebellum cells in molecular layer|cerebral cortex endothelial cells|cerebral cortex glial cells|cerebral cortex neuron…	Promotes the release of prenylated target proteins from cellular membranes (PubMed:9712853). Modulates the activity of prenylated or palmitoylated Ras family members by regulating their subcellular location (PubMed:22002721, PubMed:23698361). Required for normal ciliary targeting of farnesylated target proteins, such as INPP5E (PubMed:24166846). Modulates the subcellular location of target protei…	Belongs to the PDE6D/unc-119 family.	O43924|O43250|	PDE6D_HUMAN
Q13956	PDE6H	Gα effector	Phosphodiesterase	Retinal cone rhodopsin-sensitive cGMP 3',5'-cyclic phosphodiesterase subunit gamma	1	10	5	0.00015324	-	Exotropia|Hyperopia|Night Blindness|Retinitis Pigmentosa|Low Vision|Achromatopsia|Pendular Nystagmus|Cone dystrophy|Dyschromatopsia|Retinal Cone Dystrophy 3A|Progressive cone dystrophy|Nystagmus, continuous pendular|Cone/cone-rod dystrophy|	retina cells in photoreceptor layer |	Participates in processes of transmission and amplification of the visual signal. cGMP-PDEs are the effector molecules in G-protein-mediated phototransduction in vertebrate rods and cones.	Belongs to the rod/cone cGMP-PDE gamma subunit family.	Q13956|Q52LY7|	CNCG_HUMAN
P16499	PDE6A	Gα effector	Phosphodiesterase	Rod cGMP-specific 3',5'-cyclic phosphodiesterase subunit alpha	1	-	3	9.5e-07	-	Glaucoma|Conductive hearing loss|Sensorineural Hearing Loss (disorder)|Hyperinsulinism|Hypogonadism|Keratoconus|Mental Retardation|Night Blindness|Nystagmus|Obesity|Optic Atrophy|Retinitis Pigmentosa|Low Vision|Cataract|Congenital hypoplasia of penis|Blindness, Legal|Mental deficiency|RETINITIS PIGMENTOSA 43|Abnormality of the retinal vasculature|	retina cells in photoreceptor layer |	This protein participates in processes of transmission and amplification of the visual signal.	Belongs to the cyclic nucleotide phosphodiesterase family.	P16499|Q0P638|	PDE6A_HUMAN
P35913	PDE6B	Gα effector	Phosphodiesterase	Rod cGMP-specific 3',5'-cyclic phosphodiesterase subunit beta	1	-	3	9.5e-07	-	Glaucoma|Conductive hearing loss|Sensorineural Hearing Loss (disorder)|Hyperinsulinism|Hypogonadism|Keratoconus|Mental Retardation|Night Blindness|Nystagmus|Obesity|Optic Atrophy|Retinitis Pigmentosa|Cataract|Congenital hypoplasia of penis|Severe myopia|Blindness, Legal|Night blindness, congenital stationary|Mental deficiency|Hypoplasia of optic disc|Oguchi disease|NIGHT BLINDNESS, CONGENITAL STA…	retina cells in photoreceptor layer |	This protein participates in processes of transmission and amplification of the visual signal. Necessary for the formation of a functional phosphodiesterase holoenzyme.	Belongs to the cyclic nucleotide phosphodiesterase family.	P35913|B7Z9T9|E7ETT3|Q53XN5|Q9BWH5|Q9UD49|	PDE6B_HUMAN
Q9NQ66	PLCB1	Gα effector	Phospholipase C	1-phosphatidylinositol 4,5-bisphosphate phosphodiesterase beta-1	5	-	11	0.0003813	-	Bipolar Disorder|Schizophrenia|West Syndrome|Unipolar Depression|Generalized seizures|Epileptic encephalopathy|Major Depressive Disorder|EPILEPTIC ENCEPHALOPATHY, EARLY INFANTILE, 12|	caudate neuronal cells|cerebral cortex neuronal cells|cerebral cortex neuropil|endometrium glandular cells|hippocampus neuronal cells|	The production of the second messenger molecules diacylglycerol (DAG) and inositol 1,4,5-trisphosphate (IP3) is mediated by activated phosphatidylinositol-specific phospholipase C enzymes.		Q9NQ66|D3DW12|D3DW13|O60325|Q17RQ6|Q5TFF7|Q5TGC9|Q8IV93|Q9BQW2|Q9H4H2|Q9H8H5|Q9NQ65|Q9NQH9|Q9NTH4|Q9UJP6|Q9UM26|	PLCB1_HUMAN
Q00722	PLCB2	Gα effector	Phospholipase C	1-phosphatidylinositol 4,5-bisphosphate phosphodiesterase beta-2	74	-	9	0.00027093	-	-	adrenal gland glandular cells|appendix glandular cells|appendix lymphoid tissue|bone marrow hematopoietic cells|breast adipocytes|breast glandular cells|breast myoepithelial cells|bronchus respiratory epithelial cells|caudate glial cells|caudate neuronal cells|cerebellum Purkinje cells|cerebellum cells in granular layer|cerebellum cells in molecular layer|cerebral cortex endothelial cells|cerebra…	The production of the second messenger molecules diacylglycerol (DAG) and inositol 1,4,5-trisphosphate (IP3) is mediated by activated phosphatidylinositol-specific phospholipase C enzymes.		Q00722|A8K6J2|B9EGH5|	PLCB2_HUMAN
Q01970	PLCB3	Gα effector	Phospholipase C	1-phosphatidylinositol 4,5-bisphosphate phosphodiesterase beta-3	17	-	9	0.00028237	-	-	appendix glandular cells|bronchus respiratory epithelial cells|cerebellum Purkinje cells|cervix, uterine glandular cells|colon endothelial cells|colon glandular cells|colon peripheral nerve/ganglion|duodenum glandular cells|gallbladder glandular cells|kidney cells in tubules|liver hepatocytes|lung macrophages|nasopharynx respiratory epithelial cells|rectum glandular cells|small intestine glandula…	The production of the second messenger molecules diacylglycerol (DAG) and inositol 1,4,5-trisphosphate (IP3) is mediated by activated phosphatidylinositol-specific phospholipase C enzymes.		Q01970|A5PKZ6|G5E960|Q8N1A4|	PLCB3_HUMAN
Q15147	PLCB4	Gα effector	Phospholipase C	1-phosphatidylinositol 4,5-bisphosphate phosphodiesterase beta-4	46	-	5	7.105e-05	-	Cleft Palate|Malocclusion|melanoma|Uveal melanoma|Low set ears|Posteriorly rotated ear|Auriculo-condylar syndrome|Uranostaphyloschisis|AURICULOCONDYLAR SYNDROME 2|Failure of development of condylar neck of mandible|Failure of development of condylar head of mandible|Angle class 2 malocclusion|	adrenal gland glandular cells|appendix glandular cells|bronchus respiratory epithelial cells|caudate neuronal cells|cerebellum Purkinje cells|cerebellum cells in granular layer|cerebellum cells in molecular layer|cerebral cortex neuronal cells|cerebral cortex neuropil|cervix, uterine squamous epithelial cells|colon glandular cells|duodenum glandular cells|epididymis glandular cells|fallopian tube…	The production of the second messenger molecules diacylglycerol (DAG) and inositol 1,4,5-trisphosphate (IP3) is mediated by activated phosphatidylinositol-specific phospholipase C enzymes. This form has a role in retina signal transduction.		Q15147|B7ZLK6|E2QRH8|Q17R56|Q5JYS8|Q5JYS9|Q5JYT0|Q5JYT3|Q5JYT4|Q9BQW5|Q9BQW6|Q9BQW8|Q9UJQ2|	PLCB4_HUMAN
P48736	PIK3CG	Gα effector	PI3/PI4 kinases	Phosphatidylinositol 4,5-bisphosphate 3-kinase catalytic subunit gamma isoform	-	12	23	0.00112194	-	Autistic Disorder|Heart failure|Medulloblastoma|Diffuse Large B-Cell Lymphoma|	-	Phosphoinositide-3-kinase (PI3K) that phosphorylates PtdIns(4,5)P2 (Phosphatidylinositol 4,5-bisphosphate) to generate phosphatidylinositol 3,4,5-trisphosphate (PIP3). PIP3 plays a key role by recruiting PH domain-containing proteins to the membrane, including AKT1 and PDPK1, activating signaling cascades involved in cell growth, survival, proliferation, motility and morphology. Links G-protein c…	Belongs to the PI3/PI4-kinase family.	P48736|A4D0Q6|Q8IV23|Q9BZC8|	PK3CG_HUMAN
Q9Y5W8	SNX13	Gα effector	Regulators of G-protein signaling	Sorting nexin-13	-	-	2	7e-08	-	-	-	May be involved in several stages of intracellular trafficking. May play a role in endosome homeostasis (By similarity). Acts as a GAP for Galphas.	Belongs to the sorting nexin family.	Q9Y5W8|B2RCI9|O94821|Q8WVZ2|Q8WXH8|	SNX13_HUMAN
P25098	GRK2	G-protein coupled receptor kinase	Ser Thr protein kinases	Beta-adrenergic receptor kinase 1	58	15	41	0.00472047	-	Rheumatoid Arthritis|Mental Depression|Depressive disorder|Heart failure|Dermatitis, Allergic Contact|	adrenal gland glandular cells|appendix glandular cells|appendix lymphoid tissue|bone marrow hematopoietic cells|breast adipocytes|breast glandular cells|breast myoepithelial cells|bronchus respiratory epithelial cells|cerebellum Purkinje cells|cerebellum cells in granular layer|cerebral cortex endothelial cells|cerebral cortex glial cells|cerebral cortex neuronal cells|cerebral cortex neuropil|ce…	Specifically phosphorylates the agonist-occupied form of the beta-adrenergic and closely related receptors, probably inducing a desensitization of them. Key regulator of LPAR1 signaling. Competes with RALA for binding to LPAR1 thus affecting the signaling properties of the receptor. Desensitizes LPAR1 and LPAR2 in a phosphorylation-independent manner (PubMed:19306925, PubMed:19715378). Positively…	Belongs to the protein kinase superfamily. AGC Ser/Thr protein kinase family. GPRK subfamily.	P25098|B0ZBE1|Q13837|Q6GTT3|	ARBK1_HUMAN
P43250	GRK6	G-protein coupled receptor kinase	Ser Thr protein kinases	G protein-coupled receptor kinase 6	61	-	20	0.00193995	-	Rheumatoid Arthritis|Schizophrenia|	adrenal gland glandular cells|appendix glandular cells|appendix lymphoid tissue|bone marrow hematopoietic cells|breast glandular cells|breast myoepithelial cells|bronchus respiratory epithelial cells|caudate glial cells|caudate neuronal cells|cerebellum Purkinje cells|cerebellum cells in granular layer|cerebellum cells in molecular layer|cerebral cortex neuronal cells|cerebral cortex neuropil|cer…	Specifically phosphorylates the activated forms of G protein-coupled receptors. Such receptor phosphorylation initiates beta-arrestin-mediated receptor desensitization, internalization, and signaling events leading to their desensitization. Seems to be involved in the desensitization of D2-like dopamine receptors in striatum and chemokine receptor CXCR4 which is critical for CXCL12-induced cell c…	Belongs to the protein kinase superfamily. AGC Ser/Thr protein kinase family. GPRK subfamily.	P43250|O60541|Q13652|	GRK6_HUMAN
Q15139	PRKD1	Gα effector	Ser Thr protein kinases	Serine/threonine-protein kinase D1	53	-	17	0.00037279	-	-	adrenal gland glandular cells|appendix glandular cells|bone marrow hematopoietic cells|breast glandular cells|breast myoepithelial cells|bronchus respiratory epithelial cells|caudate neuronal cells|cerebellum Purkinje cells|cerebellum cells in molecular layer|cerebral cortex neuronal cells|cervix, uterine squamous epithelial cells|colon glandular cells|colon peripheral nerve/ganglion|duodenum gla…	Serine/threonine-protein kinase that converts transient diacylglycerol (DAG) signals into prolonged physiological effects downstream of PKC, and is involved in the regulation of MAPK8/JNK1 and Ras signaling, Golgi membrane integrity and trafficking, cell survival through NF-kappa-B activation, cell migration, cell differentiation by mediating HDAC7 nuclear export, cell proliferation via MAPK1/3 (…	Belongs to the protein kinase superfamily. CAMK Ser/Thr protein kinase family. PKD subfamily.	Q15139|A6NL64|B2RAF6|	KPCD1_HUMAN
P35626	GRK3	G-protein coupled receptor kinase	Ser Thr protein kinases	Beta-adrenergic receptor kinase 2	68	-	9	8.213e-05	-	Bipolar Disorder|Cocaine Abuse|Schizophrenia|Cocaine Dependence|	adrenal gland glandular cells|appendix glandular cells|appendix lymphoid tissue|bone marrow hematopoietic cells|breast glandular cells|breast myoepithelial cells|bronchus respiratory epithelial cells|caudate glial cells|caudate neuronal cells|cerebellum Purkinje cells|cerebellum cells in granular layer|cerebellum cells in molecular layer|cerebral cortex endothelial cells|cerebral cortex glial cel…	Specifically phosphorylates the agonist-occupied form of the beta-adrenergic and closely related receptors.	Belongs to the protein kinase superfamily. AGC Ser/Thr protein kinase family. GPRK subfamily.	P35626|Q9UGW9|	ARBK2_HUMAN
P32298	GRK4	G-protein coupled receptor kinase	Ser Thr protein kinases	G protein-coupled receptor kinase 4	7	-	7	5.058e-05	-	-	bronchus respiratory epithelial cells|cerebral cortex neuronal cells|fallopian tube glandular cells|nasopharynx respiratory epithelial cells|ovary follicle cells|testis preleptotene spermatocytes|testis spermatogonia|	Specifically phosphorylates the activated forms of G protein-coupled receptors. GRK4-alpha can phosphorylate rhodopsin and its activity is inhibited by calmodulin; the other three isoforms do not phosphorylate rhodopsin and do not interact with calmodulin. GRK4-alpha and GRK4-gamma phosphorylate DRD3. Phosphorylates ADRB2.	Belongs to the protein kinase superfamily. AGC Ser/Thr protein kinase family. GPRK subfamily.	P32298|O00641|O00642|Q13293|Q13294|Q13295|Q14453|Q14725|Q15313|Q15314|Q15315|Q15316|Q17RH6|Q53EQ8|	GRK4_HUMAN
P63000	RAC1	Gα effector	Small GTP-binding proteins	Ras-related C3 botulinum toxin substrate 1	40	-	60	0.0057074	-	Mental Depression|Depressive disorder|Heart failure|melanoma|Liver carcinoma|	appendix lymphoid tissue|bone marrow hematopoietic cells|breast glandular cells|breast myoepithelial cells|bronchus respiratory epithelial cells|cerebral cortex neuropil|cervix, uterine squamous epithelial cells|colon endothelial cells|colon glandular cells|duodenum glandular cells|epididymis glandular cells|esophagus squamous epithelial cells|fallopian tube glandular cells|gallbladder glandular …	Plasma membrane-associated small GTPase which cycles between active GTP-bound and inactive GDP-bound states. In its active state, binds to a variety of effector proteins to regulate cellular responses such as secretory processes, phagocytosis of apoptotic cells, epithelial cell polarization, neurons adhesion, migration and differentiation, and growth-factor induced formation of membrane ruffles. …	Belongs to the small GTPase superfamily. Rho family.	P63000|O95501|P15154|Q3Y4D3|Q5JAA8|Q9BTB4|	RAC1_HUMAN
P15153	RAC2	Gα effector	Small GTP-binding proteins	Ras-related C3 botulinum toxin substrate 2	39	-	12	0.00028905	-	Liver Cirrhosis, Experimental|melanoma|Juvenile Myelomonocytic Leukemia|Neutrophil Immunodeficiency Syndrome|	adrenal gland glandular cells|appendix glandular cells|appendix lymphoid tissue|bone marrow hematopoietic cells|breast glandular cells|breast myoepithelial cells|bronchus respiratory epithelial cells|caudate neuronal cells|cerebellum Purkinje cells|cerebellum cells in molecular layer|cerebral cortex glial cells|cerebral cortex neuronal cells|cerebral cortex neuropil|gallbladder glandular cells|he…	Plasma membrane-associated small GTPase which cycles between an active GTP-bound and inactive GDP-bound state. In active state binds to a variety of effector proteins to regulate cellular responses, such as secretory processes, phagocytose of apoptotic cells and epithelial cell polarization. Augments the production of reactive oxygen species (ROS) by NADPH oxidase.	Belongs to the small GTPase superfamily. Rho family.	P15153|Q9UDJ4|	RAC2_HUMAN
P60763	RAC3	Gα effector	Small GTP-binding proteins	Ras-related C3 botulinum toxin substrate 3	40	-	9	0.00020508	-	-	appendix lymphoid tissue|bone marrow hematopoietic cells|breast glandular cells|breast myoepithelial cells|bronchus respiratory epithelial cells|cerebral cortex neuropil|cervix, uterine squamous epithelial cells|colon endothelial cells|colon glandular cells|duodenum glandular cells|epididymis glandular cells|esophagus squamous epithelial cells|fallopian tube glandular cells|gallbladder glandular …	Plasma membrane-associated small GTPase which cycles between an active GTP-bound and inactive GDP-bound state. In active state binds to a variety of effector proteins to regulate cellular responses, such as cell spreading and the formation of actin-based protusions including lamellipodia and membrane ruffles. Promotes cell adhesion and spreading on fibrinogen in a CIB1 and alpha-IIb/beta3 integri…	Belongs to the small GTPase superfamily. Rho family.	P60763|O14658|Q5U0M8|	RAC3_HUMAN
Q99614	TTC1	Gα effector	TPR repeat proteins	Tetratricopeptide repeat protein 1	63	-	16	0.0013937	-	-	adrenal gland glandular cells|appendix glandular cells|appendix lymphoid tissue|bone marrow hematopoietic cells|breast adipocytes|breast glandular cells|breast myoepithelial cells|bronchus respiratory epithelial cells|caudate glial cells|cerebellum Purkinje cells|cerebellum cells in granular layer|cerebral cortex endothelial cells|cerebral cortex glial cells|cerebral cortex neuronal cells|cerebra…			Q99614|B2RCT2|D3DQJ8|Q9BVT3|	TTC1_HUMAN
P23258	TUBG1	Gα effector	Tubulin	Tubulin gamma-1 chain	59	-	66	0.0060666	-	Epilepsy|Microcephaly|Cortical Dysplasia|Global developmental delay|Malformations of Cortical Development|CORTICAL DYSPLASIA, COMPLEX, WITH OTHER BRAIN MALFORMATIONS 4|	adrenal gland glandular cells|appendix glandular cells|bone marrow hematopoietic cells|breast adipocytes|breast glandular cells|breast myoepithelial cells|bronchus respiratory epithelial cells|caudate glial cells|caudate neuronal cells|cerebellum cells in granular layer|cerebellum cells in molecular layer|cerebral cortex endothelial cells|cerebral cortex neuronal cells|cervix, uterine glandular c…	Tubulin is the major constituent of microtubules. The gamma chain is found at microtubule organizing centers (MTOC) such as the spindle poles or the centrosome. Pericentriolar matrix component that regulates alpha/beta chain minus-end nucleation, centrosome duplication and spindle formation.	Belongs to the tubulin family.	P23258|Q53X79|Q9BW59|	TBG1_HUMAN
Q9BSJ2	TUBGCP2	Gα effector	Tubulin	Gamma-tubulin complex component 2	63	5	43	0.00400845	-	-	adrenal gland glandular cells|appendix glandular cells|bone marrow hematopoietic cells|breast glandular cells|breast myoepithelial cells|bronchus respiratory epithelial cells|caudate glial cells|caudate neuronal cells|cerebellum Purkinje cells|cerebellum cells in granular layer|cerebellum cells in molecular layer|cerebral cortex endothelial cells|cerebral cortex glial cells|cerebral cortex neuron…	Gamma-tubulin complex is necessary for microtubule nucleation at the centrosome.	Belongs to the TUBGCP family.	Q9BSJ2|B4DM18|B7ZKL8|F5H4E0|F5H4L0|O43632|Q5VWX7|	GCP2_HUMAN
Q96CW5	TUBGCP3	Gα effector	Tubulin	Gamma-tubulin complex component 3	61	5	42	0.00420164	-	-	adrenal gland glandular cells|appendix glandular cells|appendix lymphoid tissue|bone marrow hematopoietic cells|bronchus respiratory epithelial cells|caudate glial cells|cerebellum Purkinje cells|cerebellum cells in granular layer|cerebral cortex endothelial cells|cerebral cortex neuronal cells|cerebral cortex neuropil|cervix, uterine glandular cells|cervix, uterine squamous epithelial cells|colo…	Gamma-tubulin complex is necessary for microtubule nucleation at the centrosome.	Belongs to the TUBGCP family.	Q96CW5|O43631|O60852|O60853|Q5T8L2|Q7Z4K1|Q96I79|	GCP3_HUMAN
P68363	TUBA1B	Gα effector	Tubulin	Tubulin alpha-1B chain	73	4	39	0.00193564	-	Osteoporosis|	adrenal gland glandular cells|appendix glandular cells|appendix lymphoid tissue|bone marrow hematopoietic cells|breast adipocytes|breast glandular cells|breast myoepithelial cells|bronchus respiratory epithelial cells|caudate glial cells|caudate neuronal cells|cerebellum Purkinje cells|cerebellum cells in granular layer|cerebellum cells in molecular layer|cerebral cortex endothelial cells|cerebra…	Tubulin is the major constituent of microtubules. It binds two moles of GTP, one at an exchangeable site on the beta chain and one at a non-exchangeable site on the alpha chain.	Belongs to the tubulin family.	P68363|P04687|P05209|Q27I68|Q8WU19|	TBA1B_HUMAN
Q9UGJ1	TUBGCP4	Gα effector	Tubulin	Gamma-tubulin complex component 4	55	5	39	0.0029974	-	Epilepsy|Mental Retardation|Microphthalmos|Nystagmus|Optic Atrophy|Strabismus|Low Vision|Cerebral atrophy|Global developmental delay|Acquired scoliosis|Mental deficiency|Prominent ear|Malformations of Cortical Development, Group II|MICROCEPHALY AND CHORIORETINOPATHY, AUTOSOMAL RECESSIVE, 1|Chorioretinal dysplasia|Abnormally small eyeball|	adrenal gland glandular cells|appendix glandular cells|bone marrow hematopoietic cells|breast glandular cells|bronchus respiratory epithelial cells|caudate neuronal cells|cerebellum Purkinje cells|cerebellum cells in molecular layer|cerebral cortex neuronal cells|cerebral cortex neuropil|cervix, uterine glandular cells|cervix, uterine squamous epithelial cells|colon glandular cells|colon peripher…	Gamma-tubulin complex is necessary for microtubule nucleation at the centrosome.	Belongs to the TUBGCP family.	Q9UGJ1|B3KNK6|Q969X3|Q9NVF0|	GCP4_HUMAN
Q9BVA1	TUBB2B	Gα effector	Tubulin	Tubulin beta-2B chain	17	3	32	0.00212847	-	Fibrosis Of Extraocular Muscles, Congenital, 1|Malformations of Cortical Development|POLYMICROGYRIA, SYMMETRIC OR ASYMMETRIC|	breast glandular cells|bronchus respiratory epithelial cells|cerebral cortex endothelial cells|cerebral cortex neuropil|colon endothelial cells|colon glandular cells|colon peripheral nerve/ganglion|duodenum glandular cells|epididymis glandular cells|fallopian tube glandular cells|hippocampus neuronal cells|nasopharynx respiratory epithelial cells|oral mucosa squamous epithelial cells|rectum gland…	Tubulin is the major constituent of microtubules (PubMed:23001566, PubMed:28013290, PubMed:26732629). It binds two moles of GTP, one at an exchangeable site on the beta chain and one at a non-exchangeable site on the alpha chain (By similarity). Plays a critical role in proper axon guidance in both central and peripheral axon tracts (PubMed:23001566). Implicated in neuronal migration (PubMed:1946…	Belongs to the tubulin family.	Q9BVA1|A8K068|	TBB2B_HUMAN
Q9BUF5	TUBB6	Gα effector	Tubulin	Tubulin beta-6 chain	61	3	23	0.00090679	-	Liver Cirrhosis, Experimental|	adrenal gland glandular cells|appendix glandular cells|appendix lymphoid tissue|bone marrow hematopoietic cells|breast glandular cells|breast myoepithelial cells|bronchus respiratory epithelial cells|caudate glial cells|caudate neuronal cells|cerebral cortex glial cells|cerebral cortex neuronal cells|cerebral cortex neuropil|cervix, uterine glandular cells|cervix, uterine squamous epithelial cell…	Tubulin is the major constituent of microtubules. It binds two moles of GTP, one at an exchangeable site on the beta chain and one at a non-exchangeable site on the alpha chain.	Belongs to the tubulin family.	Q9BUF5|B3KM76|Q9HA42|	TBB6_HUMAN
Q9H4B7	TUBB1	Gα effector	Tubulin	Tubulin beta-1 chain	61	-	21	0.00073192	-	Acute Coronary Syndrome|Glanzmann Thrombasthenia, Autosomal Dominant|Macrothrombocytopenia, Autosomal Dominant, Tubb1-Related|	adrenal gland glandular cells|appendix glandular cells|appendix lymphoid tissue|bone marrow hematopoietic cells|breast glandular cells|breast myoepithelial cells|bronchus respiratory epithelial cells|caudate neuronal cells|cerebral cortex neuronal cells|cerebral cortex neuropil|cervix, uterine glandular cells|cervix, uterine squamous epithelial cells|colon endothelial cells|colon glandular cells|…	Tubulin is the major constituent of microtubules. It binds two moles of GTP, one at an exchangeable site on the beta chain and one at a non-exchangeable site on the alpha chain (By similarity).	Belongs to the tubulin family.	Q9H4B7|	TBB1_HUMAN
Q3ZCM7	TUBB8	Gα effector	Tubulin	Tubulin beta-8 chain	-	-	18	0.00075171	-	OOCYTE MATURATION DEFECT 2|	-	Tubulin is the major constituent of microtubules. It binds two moles of GTP, one at an exchangeable site on the beta chain and one at a non-exchangeable site on the alpha chain (By similarity). TUBB8 has a key role in meiotic spindle assembly and oocyte maturation (PubMed:26789871).	Belongs to the tubulin family.	Q3ZCM7|Q5SQX9|Q8WZ78|	TBB8_HUMAN
Q96RT8	TUBGCP5	Gα effector	Tubulin	Gamma-tubulin complex component 5	54	5	14	0.00016085	-	-	adrenal gland glandular cells|appendix glandular cells|bone marrow hematopoietic cells|breast glandular cells|breast myoepithelial cells|bronchus respiratory epithelial cells|caudate glial cells|caudate neuronal cells|cerebellum Purkinje cells|cerebellum cells in granular layer|cerebellum cells in molecular layer|cerebral cortex endothelial cells|cerebral cortex glial cells|cerebral cortex neuron…	Gamma-tubulin complex is necessary for microtubule nucleation at the centrosome.	Belongs to the TUBGCP family.	Q96RT8|E9PB12|Q6IQ52|Q96PY8|	GCP5_HUMAN
Q9NRH3	TUBG2	Gα effector	Tubulin	Tubulin gamma-2 chain	70	5	14	0.00015665	-	-	adrenal gland glandular cells|appendix glandular cells|appendix lymphoid tissue|bone marrow hematopoietic cells|breast adipocytes|breast glandular cells|breast myoepithelial cells|bronchus respiratory epithelial cells|caudate neuronal cells|cerebellum Purkinje cells|cerebellum cells in granular layer|cerebellum cells in molecular layer|cerebral cortex endothelial cells|cerebral cortex neuronal ce…	Tubulin is the major constituent of microtubules. The gamma chain is found at microtubule organizing centers (MTOC) such as the spindle poles or the centrosome. Pericentriolar matrix component that regulates alpha/beta chain minus-end nucleation, centrosome duplication and spindle formation (By similarity).	Belongs to the tubulin family.	Q9NRH3|A6NDI4|Q32NB2|	TBG2_HUMAN
Q96RT7	TUBGCP6	Gα effector	Tubulin	Gamma-tubulin complex component 6	53	5	13	8.858e-05	-	MICROCEPHALY AND CHORIORETINOPATHY, AUTOSOMAL RECESSIVE, 1|	appendix glandular cells|appendix lymphoid tissue|bone marrow hematopoietic cells|breast glandular cells|breast myoepithelial cells|bronchus respiratory epithelial cells|cerebellum Purkinje cells|cerebral cortex glial cells|cerebral cortex neuronal cells|cervix, uterine glandular cells|colon endothelial cells|colon glandular cells|colon peripheral nerve/ganglion|duodenum glandular cells|endometri…	Gamma-tubulin complex is necessary for microtubule nucleation at the centrosome.	Belongs to the TUBGCP family.	Q96RT7|Q5JZ80|Q6PJ40|Q86YE9|Q9BY91|Q9UGX3|Q9UGX4|	GCP6_HUMAN
A6NHL2	TUBAL3	Gα effector	Tubulin	Tubulin alpha chain-like 3	-	-	11	0.00031789	-	-	-	Tubulin is the major constituent of microtubules. It binds two moles of GTP, one at an exchangeable site on the beta chain and one at a non-exchangeable site on the alpha chain (By similarity).	Belongs to the tubulin family.	A6NHL2|B4DKL2|Q4QQJ5|Q9H6Z0|	TBAL3_HUMAN
Q6PEY2	TUBA3E	Gα effector	Tubulin	Tubulin alpha-3E chain	-	-	11	0.00025908	-	-	-	Tubulin is the major constituent of microtubules. It binds two moles of GTP, one at an exchangeable site on the beta chain and one at a non-exchangeable site on the alpha chain (By similarity).	Belongs to the tubulin family.	Q6PEY2|	TBA3E_HUMAN
Q9H853	TUBA4B	Gα effector	Tubulin	Putative tubulin-like protein alpha-4B	-	-	7	8.858e-05	-	-	-		Belongs to the tubulin family.	Q9H853|	TBA4B_HUMAN
Q9UJT0	TUBE1	Gα effector	Tubulin	Tubulin epsilon chain	53	-	7	8.858e-05	-	-	adrenal gland glandular cells|appendix glandular cells|appendix lymphoid tissue|bone marrow hematopoietic cells|breast adipocytes|breast glandular cells|breast myoepithelial cells|bronchus respiratory epithelial cells|caudate neuronal cells|cerebellum Purkinje cells|cerebellum cells in granular layer|cerebral cortex neuronal cells|cervix, uterine glandular cells|colon glandular cells|duodenum gla…		Belongs to the tubulin family.	Q9UJT0|Q5H8W8|Q8NEG3|	TBE_HUMAN
P41240	CSK	Gα effector	Tyr protein kinases	Tyrosine-protein kinase CSK	27	16	28	0.00186317	-	Lupus Erythematosus, Systemic|	bone marrow hematopoietic cells|breast glandular cells|caudate neuronal cells|cerebellum Purkinje cells|cerebellum cells in molecular layer|cerebral cortex endothelial cells|cerebral cortex glial cells|cerebral cortex neuronal cells|cerebral cortex neuropil|colon glandular cells|colon peripheral nerve/ganglion|duodenum glandular cells|endometrium glandular cells|epididymis glandular cells|fallopi…	Non-receptor tyrosine-protein kinase that plays an important role in the regulation of cell growth, differentiation, migration and immune response. Phosphorylates tyrosine residues located in the C-terminal tails of Src-family kinases (SFKs) including LCK, SRC, HCK, FYN, LYN, CSK or YES1. Upon tail phosphorylation, Src-family members engage in intramolecular interactions between the phosphotyrosi…	Belongs to the protein kinase superfamily. Tyr protein kinase family. CSK subfamily.	P41240|Q2M3N2|Q6FGZ6|	CSK_HUMAN
O14745	SLC9A3R1	Gα effector | β-arrestin Interactor	Ezrin-radixin-moesin-binding phosphoproteins | Trafficking	Na(+)/H(+) exchange regulatory cofactor NHE-RF1	45	-	27	0.00265999	-	Osteopenia|Osteoporosis|Nephrolithiasis|Generalized osteopenia|Nephrolithiasis-Osteoporosis, Hypophosphatemic, 2|	adrenal gland glandular cells|appendix glandular cells|appendix lymphoid tissue|bone marrow hematopoietic cells|breast glandular cells|bronchus respiratory epithelial cells|cerebral cortex neuropil|cervix, uterine glandular cells|cervix, uterine squamous epithelial cells|colon glandular cells|duodenum glandular cells|endometrium glandular cells|epididymis glandular cells|esophagus squamous epithe…	Scaffold protein that connects plasma membrane proteins with members of the ezrin/moesin/radixin family and thereby helps to link them to the actin cytoskeleton and to regulate their surface expression. Necessary for recycling of internalized ADRB2. Was first known to play a role in the regulation of the activity and subcellular location of SLC9A3. Necessary for cAMP-mediated phosphorylation and …		O14745|B3KY21|O43552|Q86WQ5|	NHRF1_HUMAN
O15085	ARHGEF11	Gα effector | β-arrestin Interactor	Guanine nucleotide exchange factors | Signaling	Rho guanine nucleotide exchange factor 11	73	16	16	0.00130126	-	Schizophrenia|	adrenal gland glandular cells|appendix glandular cells|appendix lymphoid tissue|bone marrow hematopoietic cells|breast adipocytes|breast glandular cells|breast myoepithelial cells|bronchus respiratory epithelial cells|caudate neuronal cells|cerebellum Purkinje cells|cerebellum cells in granular layer|cerebral cortex endothelial cells|cerebral cortex glial cells|cerebral cortex neuronal cells|cere…	May play a role in the regulation of RhoA GTPase by guanine nucleotide-binding alpha-12 (GNA12) and alpha-13 (GNA13). Acts as guanine nucleotide exchange factor (GEF) for RhoA GTPase and may act as GTPase-activating protein (GAP) for GNA12 and GNA13. Involved in neurotrophin-induced neurite outgrowth.		O15085|D3DVD0|Q5VY40|Q6PFW2|	ARHGB_HUMAN
Q9NZN5	ARHGEF12	Gα effector | β-arrestin Interactor	Guanine nucleotide exchange factors | Signaling	Rho guanine nucleotide exchange factor 12	51	-	8	0.00033214	-	Leukemia, Myelocytic, Acute|	adrenal gland glandular cells|appendix glandular cells|appendix lymphoid tissue|breast glandular cells|bronchus respiratory epithelial cells|cerebellum cells in molecular layer|cerebral cortex endothelial cells|cerebral cortex neuronal cells|cerebral cortex neuropil|cervix, uterine squamous epithelial cells|colon endothelial cells|colon glandular cells|duodenum glandular cells|endometrium glandul…	May play a role in the regulation of RhoA GTPase by guanine nucleotide-binding alpha-12 (GNA12) and alpha-13 (GNA13). Acts as guanine nucleotide exchange factor (GEF) for RhoA GTPase and may act as GTPase-activating protein (GAP) for GNA12 and GNA13.		Q9NZN5|O15086|Q6P526|	ARHGC_HUMAN
P42336	PIK3CA	Gα effector | β-arrestin Interactor	PI3/PI4 kinases | Signaling	Phosphatidylinositol 4,5-bisphosphate 3-kinase catalytic subunit alpha isoform	72	-	21	0.00106489	-	Angioid Streaks|Anxiety|Congenital arteriovenous malformation|Malignant neoplasm of breast|Malignant tumor of colon|Basal cell carcinoma|Bronchioloalveolar Adenocarcinoma|Renal Cell Carcinoma|Squamous cell carcinoma|Adenoid Cystic Carcinoma|Depressive disorder|Diverticular disease of colon|Dysgerminoma|Epilepsy|Fetal Alcohol Syndrome|Glioblastoma|Gynecomastia|Hamartoma Syndrome, Multiple|Hemangio…	adrenal gland glandular cells|appendix glandular cells|appendix lymphoid tissue|bone marrow hematopoietic cells|breast adipocytes|breast glandular cells|breast myoepithelial cells|bronchus respiratory epithelial cells|caudate glial cells|caudate neuronal cells|cerebellum Purkinje cells|cerebellum cells in granular layer|cerebellum cells in molecular layer|cerebral cortex endothelial cells|cerebra…	Phosphoinositide-3-kinase (PI3K) that phosphorylates PtdIns (Phosphatidylinositol), PtdIns4P (Phosphatidylinositol 4- phosphate) and PtdIns(4,5)P2 (Phosphatidylinositol 4,5- bisphosphate) to generate phosphatidylinositol 3,4,5-trisphosphate (PIP3). PIP3 plays a key role by recruiting PH domain-containing proteins to the membrane, including AKT1 and PDPK1, activating signaling cascades involved in…	Belongs to the PI3/PI4-kinase family.	P42336|Q14CW1|Q99762|	PK3CA_HUMAN
P42338	PIK3CB	Gα effector | β-arrestin Interactor	PI3/PI4 kinases | Signaling	Phosphatidylinositol 4,5-bisphosphate 3-kinase catalytic subunit beta isoform	70	-	11	0.00054972	-	Schizophrenia|Diffuse Large B-Cell Lymphoma|	adrenal gland glandular cells|appendix glandular cells|appendix lymphoid tissue|bone marrow hematopoietic cells|breast glandular cells|breast myoepithelial cells|bronchus respiratory epithelial cells|caudate glial cells|caudate neuronal cells|cerebellum Purkinje cells|cerebellum cells in granular layer|cerebral cortex endothelial cells|cerebral cortex glial cells|cerebral cortex neuronal cells|ce…	Phosphoinositide-3-kinase (PI3K) that phosphorylates PtdIns (Phosphatidylinositol), PtdIns4P (Phosphatidylinositol 4- phosphate) and PtdIns(4,5)P2 (Phosphatidylinositol 4,5- bisphosphate) to generate phosphatidylinositol 3,4,5-trisphosphate (PIP3). PIP3 plays a key role by recruiting PH domain-containing proteins to the membrane, including AKT1 and PDPK1, activating signaling cascades involved in…	Belongs to the PI3/PI4-kinase family.	P42338|D3DNF0|Q24JU2|	PK3CB_HUMAN
P60953	CDC42	Gα effector | β-arrestin Interactor	Small GTP-binding proteins | Signaling	Cell division control protein 42 homolog	51	9	53	0.00611869	-	Schizophrenia|TAKENOUCHI-KOSAKI SYNDROME|	adrenal gland glandular cells|appendix glandular cells|bone marrow hematopoietic cells|breast glandular cells|bronchus respiratory epithelial cells|caudate neuronal cells|cerebellum Purkinje cells|cerebral cortex neuronal cells|cerebral cortex neuropil|cervix, uterine squamous epithelial cells|colon endothelial cells|colon glandular cells|colon peripheral nerve/ganglion|duodenum glandular cells|e…	Plasma membrane-associated small GTPase which cycles between an active GTP-bound and an inactive GDP-bound state. In active state binds to a variety of effector proteins to regulate cellular responses. Involved in epithelial cell polarization processes. Regulates the bipolar attachment of spindle microtubules to kinetochores before chromosome congression in metaphase. Plays a role in the extensio…	Belongs to the small GTPase superfamily. Rho family. CDC42 subfamily.	P60953|P21181|P25763|Q7L8R5|Q9UDI2|	CDC42_HUMAN
Q71U36	TUBA1A	Gα effector | β-arrestin Interactor	Tubulin | Cytoskeleton remodeling	Tubulin alpha-1A chain	73	3	78	0.00814445	-	Epilepsy|Severe mental retardation (I.Q. 20-34)|Myocardial Ischemia|Agenesis of corpus callosum|Lissencephaly|Polymicrogyria|Pachygyria|Hypoplasia of corpus callosum|Spastic Quadriplegia|Agyria|Lissencephaly 3|	adrenal gland glandular cells|appendix glandular cells|appendix lymphoid tissue|bone marrow hematopoietic cells|breast adipocytes|breast glandular cells|breast myoepithelial cells|bronchus respiratory epithelial cells|caudate glial cells|caudate neuronal cells|cerebellum Purkinje cells|cerebellum cells in granular layer|cerebellum cells in molecular layer|cerebral cortex endothelial cells|cerebra…	Tubulin is the major constituent of microtubules. It binds two moles of GTP, one at an exchangeable site on the beta chain and one at a non-exchangeable site on the alpha chain.	Belongs to the tubulin family.	Q71U36|A8K0B8|G3V1U9|P04687|P05209|	TBA1A_HUMAN
P07437	TUBB	Gα effector | β-arrestin Interactor	Tubulin | Cytoskeleton remodeling	Tubulin beta chain	61	3	71	0.00460304	-	Michelin tire baby syndrome|CORTICAL DYSPLASIA, COMPLEX, WITH OTHER BRAIN MALFORMATIONS 6|	adrenal gland glandular cells|appendix glandular cells|appendix lymphoid tissue|bone marrow hematopoietic cells|breast glandular cells|breast myoepithelial cells|bronchus respiratory epithelial cells|caudate glial cells|caudate neuronal cells|cerebral cortex glial cells|cerebral cortex neuronal cells|cerebral cortex neuropil|cervix, uterine glandular cells|cervix, uterine squamous epithelial cell…	Tubulin is the major constituent of microtubules. It binds two moles of GTP, one at an exchangeable site on the beta chain and one at a non-exchangeable site on the alpha chain.	Belongs to the tubulin family.	P07437|P05218|Q8WUC1|Q9CY33|	TBB5_HUMAN
Q13509	TUBB3	Gα effector | β-arrestin Interactor	Tubulin | Cytoskeleton remodeling	Tubulin beta-3 chain	22	3	61	0.00505726	-	Blepharoptosis|Exotropia|Moderate mental retardation (I.Q. 35-49)|Nystagmus|Strabismus|Agenesis of corpus callosum|Polymicrogyria|Hypoplasia of corpus callosum|Cortical Dysplasia|Global developmental delay|ovarian neoplasm|Congenital Fibrosis of the Extraocular Muscles|Fibrosis Of Extraocular Muscles, Congenital, 1|FIBROSIS OF EXTRAOCULAR MUSCLES, CONGENITAL, 3A, WITH OR WITHOUT EXTRAOCULAR INVOL…	breast glandular cells|bronchus respiratory epithelial cells|caudate glial cells|caudate neuronal cells|cerebral cortex endothelial cells|cerebral cortex glial cells|cerebral cortex neuronal cells|cerebral cortex neuropil|colon endothelial cells|colon glandular cells|colon peripheral nerve/ganglion|duodenum glandular cells|epididymis glandular cells|fallopian tube glandular cells|hippocampus neur…	Tubulin is the major constituent of microtubules. It binds two moles of GTP, one at an exchangeable site on the beta chain and one at a non-exchangeable site on the alpha chain. TUBB3 plays a critical role in proper axon guidance and mantainance.	Belongs to the tubulin family.	Q13509|A8K854|Q9BTZ0|Q9BW10|	TBB3_HUMAN
P68366	TUBA4A	Gα effector | β-arrestin Interactor	Tubulin | Cytoskeleton remodeling	Tubulin alpha-4A chain	73	3	54	0.0046929	-	AMYOTROPHIC LATERAL SCLEROSIS 22 WITH OR WITHOUT FRONTOTEMPORAL DEMENTIA|	adrenal gland glandular cells|appendix glandular cells|appendix lymphoid tissue|bone marrow hematopoietic cells|breast adipocytes|breast glandular cells|breast myoepithelial cells|bronchus respiratory epithelial cells|caudate glial cells|caudate neuronal cells|cerebellum Purkinje cells|cerebellum cells in granular layer|cerebellum cells in molecular layer|cerebral cortex endothelial cells|cerebra…	Tubulin is the major constituent of microtubules. It binds two moles of GTP, one at an exchangeable site on the beta chain and one at a non-exchangeable site on the alpha chain.	Belongs to the tubulin family.	P68366|A8MUB1|B3KNQ6|P05215|	TBA4A_HUMAN
Q9BQE3	TUBA1C	Gα effector | β-arrestin Interactor	Tubulin | Cytoskeleton remodeling	Tubulin alpha-1C chain	73	3	48	0.00271586	-	Acute Coronary Syndrome|	adrenal gland glandular cells|appendix glandular cells|appendix lymphoid tissue|bone marrow hematopoietic cells|breast adipocytes|breast glandular cells|breast myoepithelial cells|bronchus respiratory epithelial cells|caudate glial cells|caudate neuronal cells|cerebellum Purkinje cells|cerebellum cells in granular layer|cerebellum cells in molecular layer|cerebral cortex endothelial cells|cerebra…	Tubulin is the major constituent of microtubules. It binds two moles of GTP, one at an exchangeable site on the beta chain and one at a non-exchangeable site on the alpha chain.	Belongs to the tubulin family.	Q9BQE3|	TBA1C_HUMAN
Q13885	TUBB2A	Gα effector | β-arrestin Interactor	Tubulin | Cytoskeleton remodeling	Tubulin beta-2A chain	17	3	42	0.00220913	-	Epilepsy|Creutzfeldt-Jakob disease|Leukemia, Myelocytic, Acute|Hypoplasia of corpus callosum|Cortical Dysplasia|Global developmental delay|Juvenile arthritis|CORTICAL DYSPLASIA, COMPLEX, WITH OTHER BRAIN MALFORMATIONS 5|	breast glandular cells|bronchus respiratory epithelial cells|cerebral cortex endothelial cells|cerebral cortex neuropil|colon endothelial cells|colon glandular cells|colon peripheral nerve/ganglion|duodenum glandular cells|epididymis glandular cells|fallopian tube glandular cells|hippocampus neuronal cells|nasopharynx respiratory epithelial cells|oral mucosa squamous epithelial cells|rectum gland…	Tubulin is the major constituent of microtubules. It binds two moles of GTP, one at an exchangeable site on the beta chain and one at a non-exchangeable site on the alpha chain (By similarity).	Belongs to the tubulin family.	Q13885|Q6FGZ8|Q8IWR2|	TBB2A_HUMAN
P0DPH7	TUBA3C	Gα effector | β-arrestin Interactor	Tubulin | Cytoskeleton remodeling	Tubulin alpha-3C chain	-	4	41	0.00253218	-	-	-	Tubulin is the major constituent of microtubules. It binds two moles of GTP, one at an exchangeable site on the beta chain and one at a non-exchangeable site on the alpha chain.	Belongs to the tubulin family.	P0DPH7|A6NJQ0|Q13748|Q5W099|Q6PEY3|Q96F18|	TBA3C_HUMAN
P0DPH8	TUBA3D	Gα effector | β-arrestin Interactor	Tubulin | Cytoskeleton remodeling	Tubulin alpha-3D chain	-	4	41	0.00253218	-	-	-	Tubulin is the major constituent of microtubules. It binds two moles of GTP, one at an exchangeable site on the beta chain and one at a non-exchangeable site on the alpha chain.	Belongs to the tubulin family.	P0DPH8|A6NJQ0|Q13748|Q5W099|Q6PEY3|Q96F18|	TBA3D_HUMAN
P68371	TUBB4B	Gα effector | β-arrestin Interactor	Tubulin | Cytoskeleton remodeling	Tubulin beta-4B chain	61	4	40	0.00160469	-	-	adrenal gland glandular cells|appendix glandular cells|appendix lymphoid tissue|bone marrow hematopoietic cells|breast glandular cells|breast myoepithelial cells|bronchus respiratory epithelial cells|caudate glial cells|caudate neuronal cells|cerebral cortex glial cells|cerebral cortex neuronal cells|cerebral cortex neuropil|cervix, uterine glandular cells|cervix, uterine squamous epithelial cell…	Tubulin is the major constituent of microtubules. It binds two moles of GTP, one at an exchangeable site on the beta chain and one at a non-exchangeable site on the alpha chain.	Belongs to the tubulin family.	P68371|A2BFA2|P05217|	TBB4B_HUMAN
P04350	TUBB4A	Gα effector | β-arrestin Interactor	Tubulin | Cytoskeleton remodeling	Tubulin beta-4A chain	18	3	30	0.0014832	-	DYSTONIA 4, TORSION, AUTOSOMAL DOMINANT (disorder)|Leukodystrophy, Hypomyelinating, 6|	adrenal gland glandular cells|breast glandular cells|bronchus respiratory epithelial cells|cerebral cortex endothelial cells|cerebral cortex neuropil|colon endothelial cells|colon glandular cells|colon peripheral nerve/ganglion|duodenum glandular cells|epididymis glandular cells|fallopian tube glandular cells|hippocampus neuronal cells|nasopharynx respiratory epithelial cells|oral mucosa squamous…	Tubulin is the major constituent of microtubules. It binds two moles of GTP, one at an exchangeable site on the beta chain and one at a non-exchangeable site on the alpha chain.	Belongs to the tubulin family.	P04350|B3KQP4|Q969E5|	TBB4A_HUMAN
Q9NY65	TUBA8	Gα effector | β-arrestin Interactor	Tubulin | Cytoskeleton remodeling	Tubulin alpha-8 chain	71	-	15	0.00115695	-	Bipolar Disorder|Rickets|Aminoaciduria|Adult Fanconi syndrome|FANCONI RENOTUBULAR SYNDROME 3|Epilepsy|Profound Mental Retardation|Polymicrogyria|Hypoplasia of the optic nerve|Colpocephaly|Global developmental delay|Neonatal Hypotonia|Polymicrogyria With Optic Nerve Hypoplasia|Profound intellectual disabilities|	adrenal gland glandular cells|appendix glandular cells|appendix lymphoid tissue|bone marrow hematopoietic cells|breast adipocytes|breast glandular cells|breast myoepithelial cells|bronchus respiratory epithelial cells|caudate glial cells|caudate neuronal cells|cerebellum Purkinje cells|cerebellum cells in granular layer|cerebellum cells in molecular layer|cerebral cortex glial cells|cerebral cort…	Tubulin is the major constituent of microtubules. It binds two moles of GTP, one at an exchangeable site on the beta chain and one at a non-exchangeable site on the alpha chain.	Belongs to the tubulin family.	Q9NY65|B2RCX2|B3KPW9|B4DWG3|Q2M3N4|	TBA8_HUMAN
P12931	SRC	Gα effector | β-arrestin Interactor	Tyr protein kinases | Signaling	Proto-oncogene tyrosine-protein kinase Src	29	-	89	0.0183607	Bottleneck	Bladder Neoplasm|Renal Cell Carcinoma|Colitis|Status Epilepticus|Autosomal Recessive Polycystic Kidney Disease|Transitional cell carcinoma of bladder|Leiomyosarcoma of uterus|Hereditary nonpolyposis colorectal carcinoma|	adrenal gland glandular cells|appendix glandular cells|bronchus respiratory epithelial cells|cerebral cortex endothelial cells|cerebral cortex neuropil|cervix, uterine squamous epithelial cells|duodenum glandular cells|epididymis glandular cells|esophagus squamous epithelial cells|gallbladder glandular cells|heart muscle myocytes|hippocampus glial cells|kidney cells in tubules|nasopharynx respira…	Non-receptor protein tyrosine kinase which is activated following engagement of many different classes of cellular receptors including immune response receptors, integrins and other adhesion receptors, receptor protein tyrosine kinases, G protein- coupled receptors as well as cytokine receptors. Participates in signaling pathways that control a diverse spectrum of biological activities including …	Belongs to the protein kinase superfamily. Tyr protein kinase family. SRC subfamily.	P12931|E1P5V4|Q76P87|Q86VB9|Q9H5A8|	SRC_HUMAN
Q06187	BTK	Gα effector | β-arrestin Interactor	Tyr protein kinases | Signaling	Tyrosine-protein kinase BTK	9	-	32	0.00163762	-	Agammaglobulinemia|Arthritis|Conjunctivitis|Encephalitis|Epididymitis|Sensorineural Hearing Loss (disorder)|Meningitis|Otitis Media|Pneumonia|prostatitis|Cor pulmonale|Pyoderma|Septicemia|Sinusitis|X-linked agammaglobulinemia|Speech Delay|Recurrent urinary tract infection|Glossoptosis|Chronic otitis media|Congenital deafness|Chronic diarrhea|X-linked agammaglobulinemia with growth hormone deficie…	appendix lymphoid tissue|bone marrow hematopoietic cells|lung macrophages|lymph node germinal center cells|lymph node non-germinal center cells|spleen cells in red pulp|spleen cells in white pulp|tonsil germinal center cells|tonsil non-germinal center cells|	Non-receptor tyrosine kinase indispensable for B lymphocyte development, differentiation and signaling. Binding of antigen to the B-cell antigen receptor (BCR) triggers signaling that ultimately leads to B-cell activation. After BCR engagement and activation at the plasma membrane, phosphorylates PLCG2 at several sites, igniting the downstream signaling pathway through calcium mobilization, follo…	Belongs to the protein kinase superfamily. Tyr protein kinase family. TEC subfamily.	Q06187|B2RAW1|Q32ML5|	BTK_HUMAN
Q14344	GNA13	Gα protein	G12/13	Guanine nucleotide-binding protein subunit alpha-13	58	6	45	0.0115381	Bottleneck	Burkitt Lymphoma|	adrenal gland glandular cells|appendix glandular cells|appendix lymphoid tissue|bone marrow hematopoietic cells|breast glandular cells|bronchus respiratory epithelial cells|caudate neuronal cells|cerebellum Purkinje cells|cerebellum cells in molecular layer|cerebral cortex endothelial cells|cerebral cortex neuronal cells|cervix, uterine squamous epithelial cells|colon glandular cells|colon periph…	Guanine nucleotide-binding proteins (G proteins) are involved as modulators or transducers in various transmembrane signaling systems (PubMed:15240885, PubMed:16787920, PubMed:16705036, PubMed:27084452). Activates effector molecule RhoA by binding and activating RhoGEFs (ARHGEF1/p115RhoGEF, ARHGEF11/PDZ-RhoGEF and ARHGEF12/LARG) (PubMed:15240885, PubMed:12515866). GNA13-dependent Rho signaling su…	Belongs to the G-alpha family. G(12) subfamily.	Q14344|B2R977|B7Z7R0|F5H1G8|Q8TD70|	GNA13_HUMAN
Q03113	GNA12	Gα protein	G12/13	Guanine nucleotide-binding protein subunit alpha-12	45	6	42	0.00377892	-	Ulcerative Colitis|Myocardial Ischemia|Nonorganic psychosis|	adrenal gland glandular cells|appendix glandular cells|bone marrow hematopoietic cells|breast adipocytes|breast glandular cells|bronchus respiratory epithelial cells|cerebral cortex neuropil|cervix, uterine glandular cells|cervix, uterine squamous epithelial cells|colon glandular cells|duodenum glandular cells|endometrium glandular cells|epididymis glandular cells|esophagus squamous epithelial ce…	Guanine nucleotide-binding proteins (G proteins) are involved as modulators or transducers in various transmembrane signaling systems (PubMed:22609986, PubMed:15525651, PubMed:15240885, PubMed:17565996, PubMed:12515866, PubMed:16787920, PubMed:16705036, PubMed:23762476, PubMed:27084452). Activates effector molecule RhoA by binding and activating RhoGEFs (ARHGEF12/LARG) (PubMed:15240885, PubMed:12…	Belongs to the G-alpha family. G(12) subfamily.	Q03113|A4D204|B3KXS2|B7Z3F7|Q2T9L1|Q5PPR5|Q86UM8|Q8TD71|Q9UDU9|	GNA12_HUMAN
P04899	GNAI2	Gα protein	Gi/o	Guanine nucleotide-binding protein G(i) subunit alpha-2	68	4	198	0.0523121	Hub/Bottleneck	Atrioventricular Block|Liver Cirrhosis, Experimental|Paroxysmal ventricular tachycardia|Familial ventricular tachycardia|	adrenal gland glandular cells|appendix glandular cells|appendix lymphoid tissue|bone marrow hematopoietic cells|breast glandular cells|breast myoepithelial cells|bronchus respiratory epithelial cells|caudate glial cells|cerebellum Purkinje cells|cerebellum cells in granular layer|cerebellum cells in molecular layer|cerebral cortex endothelial cells|cerebral cortex glial cells|cerebral cortex neur…	Guanine nucleotide-binding proteins (G proteins) are involved as modulators or transducers in various transmembrane signaling systems. The G(i) proteins are involved in hormonal regulation of adenylate cyclase: they inhibit the cyclase in response to beta-adrenergic stimuli. May play a role in cell division.	Belongs to the G-alpha family. G(i/o/t/z) subfamily.	P04899|B3KTZ0|B4DYA0|B4E2X5|Q6B6N3|Q8IZ71|	GNAI2_HUMAN
P63096	GNAI1	Gα protein	Gi/o	Guanine nucleotide-binding protein G(i) subunit alpha-1	45	4	194	0.0571375	Hub/Bottleneck	Amnesia|Substance Withdrawal Syndrome|	adrenal gland glandular cells|bone marrow hematopoietic cells|breast glandular cells|bronchus respiratory epithelial cells|caudate glial cells|caudate neuronal cells|cerebellum Purkinje cells|cerebellum cells in granular layer|cerebral cortex endothelial cells|cerebral cortex neuropil|cervix, uterine squamous epithelial cells|colon endothelial cells|colon glandular cells|duodenum glandular cells|…	Guanine nucleotide-binding proteins (G proteins) function as transducers downstream of G protein-coupled receptors (GPCRs) in numerous signaling cascades. The alpha chain contains the guanine nucleotide binding site and alternates between an active, GTP-bound state and an inactive, GDP-bound state. Signaling by an activated GPCR promotes GDP release and GTP binding. The alpha subunit has a low GT…	Belongs to the G-alpha family. G(i/o/t/z) subfamily.	P63096|A8KA88|B4E2V1|C9J3A4|P04898|P11015|P31871|Q5U074|Q8TAN5|Q9UGA4|	GNAI1_HUMAN
P08754	GNAI3	Gα protein	Gi/o	Guanine nucleotide-binding protein G(k) subunit alpha	45	4	186	0.0382779	Hub/Bottleneck	Amnesia|Cleft Palate|Malocclusion|Low set ears|Posteriorly rotated ear|Auriculo-condylar syndrome|Uranostaphyloschisis|Capuchin ears|Anterior open-bite malocclusion|Failure of development of condylar neck of mandible|Failure of development of condylar head of mandible|Angle class 2 malocclusion|	adrenal gland glandular cells|bone marrow hematopoietic cells|breast glandular cells|bronchus respiratory epithelial cells|caudate glial cells|caudate neuronal cells|cerebellum Purkinje cells|cerebellum cells in granular layer|cerebral cortex endothelial cells|cerebral cortex neuropil|cervix, uterine squamous epithelial cells|colon endothelial cells|colon glandular cells|duodenum glandular cells|…	Heterotrimeric guanine nucleotide-binding proteins (G proteins) function as transducers downstream of G protein-coupled receptors (GPCRs) in numerous signaling cascades. The alpha chain contains the guanine nucleotide binding site and alternates between an active, GTP-bound state and an inactive, GDP-bound state. Signaling by an activated GPCR promotes GDP release and GTP binding. The alpha subun…	Belongs to the G-alpha family. G(i/o/t/z) subfamily.	P08754|P17539|Q5TZX1|	GNAI3_HUMAN
P09471	GNAO1	Gα protein	Gi/o	Guanine nucleotide-binding protein G(o) subunit alpha	11	4	178	0.0278209	Hub/Bottleneck	Schizophrenia|Substance Withdrawal Syndrome|Cerebral atrophy|Hypoplasia of corpus callosum|Early infantile epileptic encephalopathy with suppression bursts|Epileptic encephalopathy|Global developmental delay|EPILEPTIC ENCEPHALOPATHY, EARLY INFANTILE, 17|Supratentorial atrophy|	caudate neuronal cells|cerebellum Purkinje cells|cerebellum cells in granular layer|cerebral cortex neuronal cells|cerebral cortex neuropil|colon peripheral nerve/ganglion|hippocampus neuronal cells|pancreas islets of Langerhans|rectum glandular cells|seminal vesicle glandular cells|soft tissue peripheral nerve|	Guanine nucleotide-binding proteins (G proteins) are involved as modulators or transducers in various transmembrane signaling systems. The G(o) protein function is not clear. Stimulated by RGS14.	Belongs to the G-alpha family. G(i/o/t/z) subfamily.	P09471|P29777|Q8TD72|Q9UMV4|	GNAO_HUMAN
P19086	GNAZ	Gα protein	Gi/o	Guanine nucleotide-binding protein G(z) subunit alpha	16	11	138	0.0124157	Hub/Bottleneck	-	adrenal gland glandular cells|caudate neuronal cells|cerebellum cells in granular layer|cerebellum cells in molecular layer|cerebral cortex glial cells|cerebral cortex neuronal cells|cerebral cortex neuropil|colon peripheral nerve/ganglion|epididymis glandular cells|gallbladder glandular cells|hippocampus neuronal cells|pancreas islets of Langerhans|seminal vesicle glandular cells|soft tissue adi…	Guanine nucleotide-binding proteins (G proteins) are involved as modulators or transducers in various transmembrane signaling systems.	Belongs to the G-alpha family. G(i/o/t/z) subfamily.	P19086|B2R6C1|Q4QRJ6|	GNAZ_HUMAN
A8MTJ3	GNAT3	Gα protein	Gi/o	Guanine nucleotide-binding protein G(t) subunit alpha-3	-	10	17	0.00690584	-	-	-	Guanine nucleotide-binding protein (G protein) alpha subunit playing a prominent role in bitter and sweet taste transduction as well as in umami (monosodium glutamate, monopotassium glutamate, and inosine monophosphate) taste transduction. Transduction by this alpha subunit involves coupling of specific cell-surface receptors with a cGMP-phosphodiesterase; Activation of phosphodiesterase lowers i…	Belongs to the G-alpha family. G(i/o/t/z) subfamily.	A8MTJ3|A4D1B2|A4D1B3|B9EJG5|	GNAT3_HUMAN
P19087	GNAT2	Gα protein	Gi/o	Guanine nucleotide-binding protein G(t) subunit alpha-2	-	10	17	0.0103472	-	Exotropia|Hyperopia|Nystagmus|Low Vision|Achromatopsia|Progressive cone dystrophy (without rod involvement)|Pendular Nystagmus|Achromatopsia 1|Dyschromatopsia|Nystagmus, continuous pendular|	-	Guanine nucleotide-binding proteins (G proteins) are involved as modulators or transducers in various transmembrane signaling systems. Transducin is an amplifier and one of the transducers of a visual impulse that performs the coupling between rhodopsin and cGMP-phosphodiesterase.	Belongs to the G-alpha family. G(i/o/t/z) subfamily.	P19087|	GNAT2_HUMAN
P11488	GNAT1	Gα protein	Gi/o	Guanine nucleotide-binding protein G(t) subunit alpha-1	1	-	16	0.00344936	-	Night Blindness|Severe myopia|Night blindness, congenital stationary|Hypoplasia of optic disc|Oguchi disease|Night Blindness, Congenital Stationary, Autosomal Dominant 3|Night blindness, stationary|Abnormality of macular pigmentation|Night blindness, congenital stationary, complete|NIGHT BLINDNESS, CONGENITAL STATIONARY, TYPE 1G|	retina cells in photoreceptor layer |	Functions as signal transducer for the rod photoreceptor RHO. Required for normal RHO-mediated light perception by the retina (PubMed:22190596). Guanine nucleotide-binding proteins (G proteins) function as transducers downstream of G protein-coupled receptors (GPCRs), such as the photoreceptor RHO. The alpha chain contains the guanine nucleotide binding site and alternates between an active, GTP-…	Belongs to the G-alpha family. G(i/o/t/z) subfamily.	P11488|Q4VBN2|	GNAT1_HUMAN
P50148	GNAQ	Gα protein	Gq/11	Guanine nucleotide-binding protein G(q) subunit alpha	36	4	156	0.0756382	Hub/Bottleneck	Congenital arteriovenous malformation|Epilepsy|Glaucoma|Focal glomerulosclerosis|Hydrophthalmos|melanoma|Mental Retardation|Optic Atrophy|Retinal Detachment|Strabismus|Sturge-Weber Syndrome|Strawberry nevus of skin|Uveal melanoma|Port-Wine Stain|Cerebral atrophy|Malignant melanoma of iris|Malignant melanoma of ciliary body|Malignant melanoma of choroid|Hemangioma of choroid|Mental deficiency|Atte…	adrenal gland glandular cells|appendix glandular cells|appendix lymphoid tissue|breast glandular cells|breast myoepithelial cells|caudate glial cells|caudate neuronal cells|cerebellum Purkinje cells|cerebellum cells in molecular layer|cerebral cortex endothelial cells|cerebral cortex neuropil|cervix, uterine glandular cells|colon glandular cells|duodenum glandular cells|endometrium cells in endom…	Guanine nucleotide-binding proteins (G proteins) are involved as modulators or transducers in various transmembrane signaling systems. Regulates B-cell selection and survival and is required to prevent B-cell-dependent autoimmunity. Regulates chemotaxis of BM-derived neutrophils and dendritic cells (in vitro) (By similarity).	Belongs to the G-alpha family. G(q) subfamily.	P50148|O15108|Q13462|Q6NT27|Q92471|Q9BZB9|	GNAQ_HUMAN
P29992	GNA11	Gα protein	Gq/11	Guanine nucleotide-binding protein subunit alpha-11	36	7	110	0.014936	Hub/Bottleneck	Alopecia|Anxiety|Depressive disorder|melanoma|Nephrocalcinosis|Retinal Detachment|Mood swings|Hyperphosphatemia (disorder)|Organic writer's cramp|Uveal melanoma|Xerosis|Malignant melanoma of iris|Malignant melanoma of ciliary body|Malignant melanoma of choroid|Myasthenias|HYPOCALCIURIC HYPERCALCEMIA, FAMILIAL, TYPE II (disorder)|Cerebral cortex myoclonus|HYPOCALCEMIA, AUTOSOMAL DOMINANT 1|HYPOCAL…	adrenal gland glandular cells|appendix glandular cells|appendix lymphoid tissue|breast glandular cells|breast myoepithelial cells|caudate glial cells|caudate neuronal cells|cerebellum Purkinje cells|cerebellum cells in molecular layer|cerebral cortex endothelial cells|cerebral cortex neuropil|cervix, uterine glandular cells|colon glandular cells|duodenum glandular cells|endometrium cells in endom…	Guanine nucleotide-binding proteins (G proteins) are involved as modulators or transducers in various transmembrane signaling systems. Acts as an activator of phospholipase C.	Belongs to the G-alpha family. G(q) subfamily.	P29992|O15109|Q14350|Q6IB00|	GNA11_HUMAN
P30679	GNA15	Gα protein	Gq/11	Guanine nucleotide-binding protein subunit alpha-15	36	7	110	0.0136165	Hub/Bottleneck	-	adrenal gland glandular cells|appendix glandular cells|bone marrow hematopoietic cells|breast adipocytes|breast myoepithelial cells|bronchus respiratory epithelial cells|cerebral cortex endothelial cells|cerebral cortex neuronal cells|cervix, uterine glandular cells|colon endothelial cells|colon glandular cells|colon peripheral nerve/ganglion|duodenum glandular cells|epididymis glandular cells|ga…	Guanine nucleotide-binding proteins (G proteins) are involved as modulators or transducers in various transmembrane signaling systems.	Belongs to the G-alpha family. G(q) subfamily.	P30679|E9KL40|E9KL47|O75247|Q53XK2|	GNA15_HUMAN
O95837	GNA14	Gα protein	Gq/11	Guanine nucleotide-binding protein subunit alpha-14	36	7	103	0.00945521	Hub	Liver Cirrhosis, Experimental|Tufted angioma of skin|Kaposiform Hemangioendothelioma|	adrenal gland glandular cells|appendix glandular cells|appendix lymphoid tissue|breast glandular cells|breast myoepithelial cells|caudate glial cells|caudate neuronal cells|cerebellum Purkinje cells|cerebellum cells in molecular layer|cerebral cortex endothelial cells|cerebral cortex neuropil|cervix, uterine glandular cells|colon glandular cells|duodenum glandular cells|endometrium cells in endom…	Guanine nucleotide-binding proteins (G proteins) are involved as modulators or transducers in various transmembrane signaling systems.	Belongs to the G-alpha family. G(q) subfamily.	O95837|B1ALW3|	GNA14_HUMAN
P63092	GNAS2	Gα protein	Gs	Guanine nucleotide-binding protein G(s) subunit alpha isoforms short	46	5	107	0.0231107	Hub/Bottleneck	Acromegaly|Anxiety|Dental Enamel Hypoplasia|Endogenous depression|Depressive disorder|Epilepsy|Fibrous Dysplasia, Monostotic|Polyostotic fibrous dysplasia|Hyperparathyroidism|Hyperprolactinemia|Hyperthyroidism|Hypogonadism|Hypothyroidism|Mental Retardation|Neuroblastoma|Nystagmus|Obesity|Osteoma|Osteopenia|Osteoporosis|Osteosclerosis|Pituitary Adenoma|Polycystic Ovary Syndrome|Prolactinoma|Pseudo…	adrenal gland glandular cells|appendix glandular cells|bone marrow hematopoietic cells|breast glandular cells|breast myoepithelial cells|bronchus respiratory epithelial cells|caudate neuronal cells|cerebellum Purkinje cells|cerebral cortex glial cells|cerebral cortex neuronal cells|cerebral cortex neuropil|cervix, uterine glandular cells|cervix, uterine squamous epithelial cells|colon glandular c…	Guanine nucleotide-binding proteins (G proteins) function as transducers in numerous signaling pathways controlled by G protein-coupled receptors (GPCRs) (PubMed:17110384). Signaling involves the activation of adenylyl cyclases, resulting in increased levels of the signaling molecule cAMP (PubMed:26206488, PubMed:8702665). GNAS functions downstream of several GPCRs, including beta-adrenergic rece…	Belongs to the G-alpha family. G(s) subfamily.	P63092|A6NI00|E1P5G5|P04895|Q12927|Q14433|Q32P26|Q5JWD2|Q5JWD4|Q5JWD5|Q6NR75|Q6NXS0|Q8TBC0|Q96H70|	GNAS2_HUMAN
P38405	GNAL	Gα protein	Gs	Guanine nucleotide-binding protein G(olf) subunit alpha	27	-	2	3.4e-07	-	Bipolar Disorder|Schizophrenia|Laryngeal dystonia|DYSTONIA 25|	adrenal gland glandular cells|appendix lymphoid tissue|bronchus respiratory epithelial cells|caudate neuronal cells|colon endothelial cells|colon glandular cells|duodenum glandular cells|endometrium glandular cells|epididymis glandular cells|fallopian tube glandular cells|kidney cells in glomeruli|lung macrophages|lung pneumocytes|lymph node non-germinal center cells|nasopharynx respiratory epith…	Guanine nucleotide-binding proteins (G proteins) are involved as modulators or transducers in various transmembrane signaling systems. G(olf) alpha mediates signal transduction within the olfactory neuroepithelium and the basal ganglia. May be involved in some aspect of visual transduction, and in mediating the effect of one or more hormones/neurotransmitters.	Belongs to the G-alpha family. G(s) subfamily.	P38405|B7ZA26|Q86XU3|	GNAL_HUMAN
Q5JWF2	GNAS1	Gα protein	Gs	Guanine nucleotide-binding protein G(s) subunit alpha isoforms XLas	46	4	119	0.0470491	Hub/Bottleneck	Acromegaly|Anxiety|Dental Enamel Hypoplasia|Endogenous depression|Depressive disorder|Epilepsy|Fibrous Dysplasia, Monostotic|Polyostotic fibrous dysplasia|Hyperparathyroidism|Hyperprolactinemia|Hyperthyroidism|Hypogonadism|Hypothyroidism|Mental Retardation|Neuroblastoma|Nystagmus|Obesity|Osteoma|Osteopenia|Osteoporosis|Osteosclerosis|Pituitary Adenoma|Polycystic Ovary Syndrome|Prolactinoma|Pseudo…	adrenal gland glandular cells|appendix glandular cells|bone marrow hematopoietic cells|breast glandular cells|breast myoepithelial cells|bronchus respiratory epithelial cells|caudate neuronal cells|cerebellum Purkinje cells|cerebral cortex glial cells|cerebral cortex neuronal cells|cerebral cortex neuropil|cervix, uterine glandular cells|cervix, uterine squamous epithelial cells|colon glandular c…	Guanine nucleotide-binding proteins (G proteins) function as transducers in numerous signaling pathways controlled by G protein-coupled receptors (GPCRs). Signaling involves the activation of adenylyl cyclases, resulting in increased levels of the signaling molecule cAMP. GNAS functions downstream of several GPCRs, including beta-adrenergic receptors. XLas isoforms interact with the same set of r…	Belongs to the G-alpha family. G(s) subfamily.	Q5JWF2|A2A2S3|E1P5G3|O75684|O75685|Q5JW67|Q5JWF1|Q9NY42|	GNAS1_HUMAN
P32121	ARRB2	β-arrestin	Signaling	Beta-arrestin-2	-	1	388	0.174249	Hub/Bottleneck	Bipolar Disorder|Mental Depression|Depressive disorder|Liver Cirrhosis, Experimental|Schizophrenia|Cocaine Dependence|	-	Functions in regulating agonist-mediated G-protein coupled receptor (GPCR) signaling by mediating both receptor desensitization and resensitization processes. During homologous desensitization, beta-arrestins bind to the GPRK-phosphorylated receptor and sterically preclude its coupling to the cognate G- protein; the binding appears to require additional receptor determinants exposed only in the a…	Belongs to the arrestin family.	P32121|B4DLW0|B5B0C0|B7WPL3|D3DTK2|H0Y688|Q0Z8D3|Q2PP19|Q6ICT3|Q8N7Y2|Q9UEQ6|	ARRB2_HUMAN
P49407	ARRB1	β-arrestin	Signaling	Beta-arrestin-1	45	3	303	0.149632	Hub/Bottleneck	Liver Cirrhosis|Unipolar Depression|Major Depressive Disorder|Social Anhedonia|	adrenal gland glandular cells|appendix glandular cells|breast glandular cells|bronchus respiratory epithelial cells|caudate neuronal cells|cerebellum Purkinje cells|cerebral cortex neuronal cells|cervix, uterine glandular cells|cervix, uterine squamous epithelial cells|colon endothelial cells|colon glandular cells|duodenum glandular cells|endometrium glandular cells|epididymis glandular cells|eso…	Functions in regulating agonist-mediated G-protein coupled receptor (GPCR) signaling by mediating both receptor desensitization and resensitization processes. During homologous desensitization, beta-arrestins bind to the GPRK-phosphorylated receptor and sterically preclude its coupling to the cognate G- protein; the binding appears to require additional receptor determinants exposed only in the a…	Belongs to the arrestin family.	P49407|B6V9G8|O75625|O75630|Q2PP20|Q9BTK8|	ARRB1_HUMAN
P11021	HSPA5	β-arrestin Interactor	Apoptosis	Endoplasmic reticulum chaperone BiP	75	3	83	0.00231895	-	Asbestosis|Bipolar Disorder|Myeloid Leukemia, Chronic|Myocardial Infarction|Obesity|Squamous cell carcinoma of esophagus|Bipolar I disorder|SPINOCEREBELLAR ATAXIA 17|Liver carcinoma|	adrenal gland glandular cells|appendix glandular cells|appendix lymphoid tissue|bone marrow hematopoietic cells|breast adipocytes|breast glandular cells|breast myoepithelial cells|bronchus respiratory epithelial cells|caudate glial cells|caudate neuronal cells|cerebellum Purkinje cells|cerebellum cells in granular layer|cerebellum cells in molecular layer|cerebral cortex endothelial cells|cerebra…	Endoplasmic reticulum chaperone that plays a key role in protein folding and quality control in the endoplasmic reticulum lumen (PubMed:2294010, PubMed:23769672, PubMed:23990668, PubMed:28332555). Involved in the correct folding of proteins and degradation of misfolded proteins via its interaction with DNAJC10/ERdj5, probably to facilitate the release of DNAJC10/ERdj5 from its substrate (By simil…	Belongs to the heat shock protein 70 family.	P11021|B0QZ61|Q2EF78|Q9NPF1|Q9UK02|	BIP_HUMAN
P38646	HSPA9	β-arrestin Interactor	Apoptosis	Stress-70 protein, mitochondrial	72	9	47	0.00084243	-	Sideroblastic anemia|Renal Cell Carcinoma|Parkinson Disease|Schizophrenia|Uveitis|Myocardial Ischemia|Chronic schizophrenia|Necrotizing Enterocolitis|Liver carcinoma|EVEN-PLUS SYNDROME|Autosomal recessive sideroblastic anemia|	adrenal gland glandular cells|appendix glandular cells|appendix lymphoid tissue|bone marrow hematopoietic cells|breast glandular cells|breast myoepithelial cells|bronchus respiratory epithelial cells|caudate glial cells|caudate neuronal cells|cerebellum Purkinje cells|cerebellum cells in granular layer|cerebellum cells in molecular layer|cerebral cortex endothelial cells|cerebral cortex glial cel…	Chaperone protein which plays an important role in mitochondrial iron-sulfur cluster (ISC) biogenesis. Interacts with and stabilizes ISC cluster assembly proteins FXN, NFU1, NFS1 and ISCU (PubMed:26702583). Regulates erythropoiesis via stabilization of ISC assembly (PubMed:21123823, PubMed:26702583). May play a role in the control of cell proliferation and cellular aging (By similarity).	Belongs to the heat shock protein 70 family.	P38646|B2RCM1|P30036|P31932|Q1HB43|Q53H23|Q6GU03|Q9BWB7|Q9UC56|	GRP75_HUMAN
Q14790	CASP8	β-arrestin Interactor	Apoptosis	Caspase-8	63	-	28	0.00028432	-	Asthma|Bipolar Disorder|Non-Small Cell Lung Carcinoma|Uterine Cervical Neoplasm|Contact Dermatitis|Diabetes Mellitus, Non-Insulin-Dependent|Eczema|melanoma|Pneumonia|Reperfusion Injury|Status Epilepticus|Dermatitis, Allergic Contact|Micronodular cirrhosis|Chronic diarrhea|Squamous cell carcinoma of the head and neck|Autoimmune Lymphoproliferative Syndrome|Autoimmune Lymphoproliferative Syndrome T…	adrenal gland glandular cells|appendix glandular cells|appendix lymphoid tissue|bone marrow hematopoietic cells|breast glandular cells|breast myoepithelial cells|bronchus respiratory epithelial cells|caudate neuronal cells|cerebellum Purkinje cells|cerebellum cells in granular layer|cerebral cortex neuronal cells|cervix, uterine glandular cells|cervix, uterine squamous epithelial cells|colon endo…	Most upstream protease of the activation cascade of caspases responsible for the TNFRSF6/FAS mediated and TNFRSF1A induced cell death. Binding to the adapter molecule FADD recruits it to either receptor. The resulting aggregate called death- inducing signaling complex (DISC) performs CASP8 proteolytic activation. The active dimeric enzyme is then liberated from the DISC and free to activate downs…	Belongs to the peptidase C14A family.	Q14790|O14676|Q14791|Q14792|Q14793|Q14794|Q14795|Q14796|Q15780|Q15806|Q53TT5|Q8TDI1|Q8TDI2|Q8TDI3|Q8TDI4|Q8TDI5|Q96T22|Q9C0K4|Q9UQ81|	CASP8_HUMAN
P55957	BID	β-arrestin Interactor	Apoptosis	BH3-interacting domain death agonist	33	-	16	8.539e-05	-	Bipolar Disorder|Schizophrenia|Liver carcinoma|	appendix glandular cells|appendix lymphoid tissue|bone marrow hematopoietic cells|cervix, uterine glandular cells|cervix, uterine squamous epithelial cells|colon glandular cells|duodenum glandular cells|endometrium cells in endometrial stroma|endometrium glandular cells|epididymis glandular cells|heart muscle myocytes|liver bile duct cells|liver hepatocytes|lung macrophages|lymph node germinal ce…	The major proteolytic product p15 BID allows the release of cytochrome c (By similarity). Isoform 1, isoform 2 and isoform 4 induce ICE-like proteases and apoptosis. Isoform 3 does not induce apoptosis. Counters the protective effect of Bcl-2.		P55957|Q549M7|Q71T04|Q7Z4M9|Q8IY86|	BID_HUMAN
Q9NYF8	BCLAF1	β-arrestin Interactor	Apoptosis	Bcl-2-associated transcription factor 1	74	-	15	5.059e-05	-	Small cell carcinoma of lung|	adrenal gland glandular cells|appendix glandular cells|appendix lymphoid tissue|bone marrow hematopoietic cells|breast adipocytes|breast glandular cells|breast myoepithelial cells|bronchus respiratory epithelial cells|caudate glial cells|caudate neuronal cells|cerebellum Purkinje cells|cerebellum cells in granular layer|cerebellum cells in molecular layer|cerebral cortex endothelial cells|cerebra…	Death-promoting transcriptional repressor. May be involved in cyclin-D1/CCND1 mRNA stability through the SNARP complex which associates with both the 3'end of the CCND1 gene and its mRNA.	Belongs to the BCLAF1/THRAP3 family.	Q9NYF8|A2RU75|B7ZM58|E1P586|Q14673|Q86WU6|Q86WY0|	BCLF1_HUMAN
P51693	APLP1	β-arrestin Interactor	Apoptosis	Amyloid-like protein 1	8	-	4	1.374e-05	-	-	caudate glial cells|cerebellum Purkinje cells|cerebral cortex endothelial cells|cerebral cortex glial cells|cerebral cortex neuronal cells|cerebral cortex neuropil|hippocampus glial cells|hippocampus neuronal cells|	May play a role in postsynaptic function. The C-terminal gamma-secretase processed fragment, ALID1, activates transcription activation through APBB1 (Fe65) binding (By similarity). Couples to JIP signal transduction through C-terminal binding. May interact with cellular G-protein signaling pathways. Can regulate neurite outgrowth through binding to components of the extracellular matrix such as h…	Belongs to the APP family.	P51693|O00113|Q96A92|	APLP1_HUMAN
Q9Y657	SPIN1	β-arrestin Interactor	Cell cycle	Spindlin-1	54	-	7	1.174e-05	-	-	appendix glandular cells|appendix lymphoid tissue|bone marrow hematopoietic cells|breast glandular cells|breast myoepithelial cells|bronchus respiratory epithelial cells|caudate glial cells|cerebellum cells in granular layer|cerebral cortex endothelial cells|cerebral cortex glial cells|cerebral cortex neuropil|cervix, uterine squamous epithelial cells|colon endothelial cells|colon glandular cells…	Chromatin reader that specifically recognizes and binds histone H3 both trimethylated at 'Lys-4' and asymmetrically dimethylated at 'Arg-8' (H3K4me3 and H3R8me2a) and acts as an activator of Wnt signaling pathway downstream of PRMT2. In case of cancer, promotes cell cancer proliferation via activation of the Wnt signaling pathway (PubMed:24589551). Overexpression induces metaphase arrest and chro…	Belongs to the SPIN/STSY family.	Q9Y657|A8K0X6|B3KRQ4|Q7KZJ8|Q9GZT2|Q9H0N7|	SPIN1_HUMAN
Q5JUX0	SPIN3	β-arrestin Interactor	Cell cycle	Spindlin-3	-	-	2	1.87e-06	-	-	-	Exhibits H3K4me3-binding activity.	Belongs to the SPIN/STSY family.	Q5JUX0|B2RUW3|B7Z8W2|Q8N5D9|	SPIN3_HUMAN
P27694	RPA1	β-arrestin Interactor	Chromatin structure	Replication protein A 70 kDa DNA-binding subunit	71	3	90	0.00271797	-	Chloracne|	adrenal gland glandular cells|appendix glandular cells|appendix lymphoid tissue|bone marrow hematopoietic cells|breast adipocytes|breast glandular cells|breast myoepithelial cells|bronchus respiratory epithelial cells|caudate glial cells|cerebellum Purkinje cells|cerebellum cells in granular layer|cerebellum cells in molecular layer|cerebral cortex glial cells|cerebral cortex neuronal cells|cereb…	As part of the heterotrimeric replication protein A complex (RPA/RP-A), binds and stabilizes single-stranded DNA intermediates, that form during DNA replication or upon DNA stress. It prevents their reannealing and in parallel, recruits and activates different proteins and complexes involved in DNA metabolism (PubMed:27723720, PubMed:27723717). Thereby, it plays an essential role both in DNA repl…	Belongs to the replication factor A protein 1 family.	P27694|A8K0Y9|Q59ES9|	RFA1_HUMAN
P16104	H2AFX	β-arrestin Interactor	Chromatin structure	Histone H2AX	74	7	61	0.00118034	-	Glioblastoma|Schizophrenia|	adrenal gland glandular cells|appendix glandular cells|appendix lymphoid tissue|bone marrow hematopoietic cells|breast adipocytes|breast glandular cells|breast myoepithelial cells|bronchus respiratory epithelial cells|caudate glial cells|caudate neuronal cells|cerebellum Purkinje cells|cerebellum cells in granular layer|cerebellum cells in molecular layer|cerebral cortex endothelial cells|cerebra…	Variant histone H2A which replaces conventional H2A in a subset of nucleosomes. Nucleosomes wrap and compact DNA into chromatin, limiting DNA accessibility to the cellular machineries which require DNA as a template. Histones thereby play a central role in transcription regulation, DNA repair, DNA replication and chromosomal stability. DNA accessibility is regulated via a complex set of post-tran…	Belongs to the histone H2A family.	P16104|Q4ZGJ7|Q6IAS5|	H2AX_HUMAN
Q96EB6	SIRT1	β-arrestin Interactor	Chromatin structure	NAD-dependent protein deacetylase sirtuin-1	41	3	38	0.00058625	-	Atherosclerosis|Bipolar Disorder|Colitis|Diabetes Mellitus, Experimental|Diabetes Mellitus, Non-Insulin-Dependent|Diabetic Retinopathy|Experimental Autoimmune Encephalomyelitis|Fatty Liver|Heart failure|Liver Cirrhosis, Experimental|Obesity|Pneumonia|Psychoses, Drug|Schizophrenia|Systemic Scleroderma|Shared Paranoid Disorder|Alcohol abuse|Streptococcal pneumonia|Lung Injury|Non-alcoholic Fatty Li…	adrenal gland glandular cells|appendix glandular cells|bone marrow hematopoietic cells|caudate glial cells|caudate neuronal cells|cerebellum cells in granular layer|cerebellum cells in molecular layer|cervix, uterine glandular cells|colon glandular cells|duodenum glandular cells|endometrium cells in endometrial stroma|endometrium glandular cells|fallopian tube glandular cells|gallbladder glandula…	NAD-dependent protein deacetylase that links transcriptional regulation directly to intracellular energetics and participates in the coordination of several separated cellular functions such as cell cycle, response to DNA damage, metobolism, apoptosis and autophagy. Can modulate chromatin function through deacetylation of histones and can promote alterations in the methylation of histones and DNA…	Belongs to the sirtuin family. Class I subfamily.	Q96EB6|Q2XNF6|Q5JVQ0|Q9GZR9|Q9Y6F0|	SIR1_HUMAN
P62805	HIST1H4A	β-arrestin Interactor	Chromatin structure	Histone H4	73	6	35	0.00075658	-	Creutzfeldt-Jakob disease|	adrenal gland glandular cells|appendix glandular cells|appendix lymphoid tissue|bone marrow hematopoietic cells|breast adipocytes|breast glandular cells|breast myoepithelial cells|bronchus respiratory epithelial cells|caudate glial cells|caudate neuronal cells|cerebellum Purkinje cells|cerebellum cells in granular layer|cerebellum cells in molecular layer|cerebral cortex endothelial cells|cerebra…	Core component of nucleosome. Nucleosomes wrap and compact DNA into chromatin, limiting DNA accessibility to the cellular machineries which require DNA as a template. Histones thereby play a central role in transcription regulation, DNA repair, DNA replication and chromosomal stability. DNA accessibility is regulated via a complex set of post-translational modifications of histones, also called h…	Belongs to the histone H4 family.	P62805|A2VCL0|P02304|P02305|Q6DRA9|Q6FGB8|Q6NWP7|	H4_HUMAN
P12956	XRCC6	β-arrestin Interactor	Chromatin structure	X-ray repair cross-complementing protein 6	75	7	35	0.0011577	-	-	adrenal gland glandular cells|appendix glandular cells|appendix lymphoid tissue|bone marrow hematopoietic cells|breast adipocytes|breast glandular cells|breast myoepithelial cells|bronchus respiratory epithelial cells|caudate glial cells|caudate neuronal cells|cerebellum Purkinje cells|cerebellum cells in granular layer|cerebellum cells in molecular layer|cerebral cortex endothelial cells|cerebra…	Single-stranded DNA-dependent ATP-dependent helicase. Has a role in chromosome translocation. The DNA helicase II complex binds preferentially to fork-like ends of double-stranded DNA in a cell cycle-dependent manner. It works in the 3'-5' direction. Binding to DNA may be mediated by XRCC6. Involved in DNA non-homologous end joining (NHEJ) required for double-strand break repair and V(D)J recombi…	Belongs to the ku70 family.	P12956|B1AHC8|Q6FG89|Q9UCQ2|Q9UCQ3|	XRCC6_HUMAN
P13010	XRCC5	β-arrestin Interactor	Chromatin structure	X-ray repair cross-complementing protein 5	68	6	34	0.00085814	-	Alcoholic Intoxication, Chronic|	adrenal gland glandular cells|appendix glandular cells|appendix lymphoid tissue|bone marrow hematopoietic cells|breast glandular cells|breast myoepithelial cells|bronchus respiratory epithelial cells|caudate glial cells|caudate neuronal cells|cerebellum Purkinje cells|cerebellum cells in granular layer|cerebellum cells in molecular layer|cerebral cortex endothelial cells|cerebral cortex glial cel…	Single-stranded DNA-dependent ATP-dependent helicase. Has a role in chromosome translocation. The DNA helicase II complex binds preferentially to fork-like ends of double-stranded DNA in a cell cycle-dependent manner. It works in the 3'-5' direction. Binding to DNA may be mediated by XRCC6. Involved in DNA non-homologous end joining (NHEJ) required for double-strand break repair and V(D)J recombi…	Belongs to the ku80 family.	P13010|A8K3X5|Q0Z7V0|Q4VBQ5|Q53HH7|Q7M4N0|Q9UCQ0|Q9UCQ1|	XRCC5_HUMAN
Q92769	HDAC2	β-arrestin Interactor	Chromatin structure	Histone deacetylase 2	75	7	26	0.00029614	-	Alcoholic Intoxication, Chronic|Squamous cell carcinoma|Mental Depression|Endometriosis|Myeloid Leukemia|Chronic Obstructive Airway Disease|melanoma|Schizophrenia|Nonorganic psychosis|	adrenal gland glandular cells|appendix glandular cells|appendix lymphoid tissue|bone marrow hematopoietic cells|breast adipocytes|breast glandular cells|breast myoepithelial cells|bronchus respiratory epithelial cells|caudate glial cells|caudate neuronal cells|cerebellum Purkinje cells|cerebellum cells in granular layer|cerebellum cells in molecular layer|cerebral cortex endothelial cells|cerebra…	Responsible for the deacetylation of lysine residues on the N-terminal part of the core histones (H2A, H2B, H3 and H4). Histone deacetylation gives a tag for epigenetic repression and plays an important role in transcriptional regulation, cell cycle progression and developmental events. Histone deacetylases act via the formation of large multiprotein complexes. Forms transcriptional repressor com…	Belongs to the histone deacetylase family. HD type 1 subfamily.	Q92769|B3KRS5|B4DL58|E1P561|Q5SRI8|Q5SZ86|Q8NEH4|	HDAC2_HUMAN
P25205	MCM3	β-arrestin Interactor	Chromatin structure	DNA replication licensing factor MCM3	26	-	23	0.00010096	-	-	appendix glandular cells|bone marrow hematopoietic cells|breast glandular cells|cervix, uterine glandular cells|cervix, uterine squamous epithelial cells|colon glandular cells|duodenum glandular cells|endometrium glandular cells|esophagus squamous epithelial cells|lymph node germinal center cells|lymph node non-germinal center cells|nasopharynx respiratory epithelial cells|oral mucosa squamous ep…	Acts as component of the MCM2-7 complex (MCM complex) which is the putative replicative helicase essential for 'once per cell cycle' DNA replication initiation and elongation in eukaryotic cells. The active ATPase sites in the MCM2-7 ring are formed through the interaction surfaces of two neighboring subunits such that a critical structure of a conserved arginine finger motif is provided in trans…	Belongs to the MCM family.	P25205|B4DWW4|Q92660|Q9BTR3|Q9NUE7|	MCM3_HUMAN
P16403	HIST1H1C	β-arrestin Interactor	Chromatin structure	Histone H1.2	74	3	21	0.00017428	-	Leukemia, Myelocytic, Acute|	adrenal gland glandular cells|appendix glandular cells|appendix lymphoid tissue|bone marrow hematopoietic cells|breast adipocytes|breast glandular cells|breast myoepithelial cells|bronchus respiratory epithelial cells|caudate glial cells|caudate neuronal cells|cerebellum Purkinje cells|cerebellum cells in granular layer|cerebellum cells in molecular layer|cerebral cortex endothelial cells|cerebra…	Histone H1 protein binds to linker DNA between nucleosomes forming the macromolecular structure known as the chromatin fiber. Histones H1 are necessary for the condensation of nucleosome chains into higher-order structured fibers. Acts also as a regulator of individual gene transcription through chromatin remodeling, nucleosome spacing and DNA methylation (By similarity).	Belongs to the histone H1/H5 family.	P16403|A8K4I2|	H12_HUMAN
P84243	H3F3A	β-arrestin Interactor	Chromatin structure	Histone H3.3	74	-	20	0.0001861	-	Glioblastoma|Glioma|Giant Cell Tumor of Bone|Chondroblastoma|	adrenal gland glandular cells|appendix glandular cells|appendix lymphoid tissue|bone marrow hematopoietic cells|breast adipocytes|breast glandular cells|breast myoepithelial cells|bronchus respiratory epithelial cells|caudate glial cells|caudate neuronal cells|cerebellum Purkinje cells|cerebellum cells in granular layer|cerebellum cells in molecular layer|cerebral cortex endothelial cells|cerebra…	Variant histone H3 which replaces conventional H3 in a wide range of nucleosomes in active genes. Constitutes the predominant form of histone H3 in non-dividing cells and is incorporated into chromatin independently of DNA synthesis. Deposited at sites of nucleosomal displacement throughout transcribed genes, suggesting that it represents an epigenetic imprint of transcriptionally active chromati…	Belongs to the histone H3 family.	P84243|P06351|P33155|Q5VV55|Q5VV56|Q66I33|Q9V3W4|	H33_HUMAN
Q02539	HIST1H1A	β-arrestin Interactor	Chromatin structure	Histone H1.1	67	-	20	0.00016393	-	-	adrenal gland glandular cells|appendix lymphoid tissue|bone marrow hematopoietic cells|breast adipocytes|breast glandular cells|breast myoepithelial cells|bronchus respiratory epithelial cells|caudate glial cells|caudate neuronal cells|cerebellum Purkinje cells|cerebellum cells in granular layer|cerebellum cells in molecular layer|cerebral cortex endothelial cells|cerebral cortex glial cells|cere…	Histone H1 protein binds to linker DNA between nucleosomes forming the macromolecular structure known as the chromatin fiber. Histones H1 are necessary for the condensation of nucleosome chains into higher-order structured fibers. Acts also as a regulator of individual gene transcription through chromatin remodeling, nucleosome spacing and DNA methylation (By similarity).	Belongs to the histone H1/H5 family.	Q02539|Q3MJ34|	H11_HUMAN
Q9BQA1	WDR77	β-arrestin Interactor	Chromatin structure	Methylosome protein 50	42	7	18	9.938e-05	-	ovarian neoplasm|	adrenal gland glandular cells|appendix glandular cells|bone marrow hematopoietic cells|breast glandular cells|breast myoepithelial cells|bronchus respiratory epithelial cells|caudate glial cells|caudate neuronal cells|cerebellum Purkinje cells|cerebellum cells in molecular layer|cerebral cortex neuronal cells|cerebral cortex neuropil|colon glandular cells|colon peripheral nerve/ganglion|duodenum …	Non-catalytic component of the methylosome complex, composed of PRMT5, WDR77 and CLNS1A, which modifies specific arginines to dimethylarginines in several spliceosomal Sm proteins and histones (PubMed:11756452). This modification targets Sm proteins to the survival of motor neurons (SMN) complex for assembly into small nuclear ribonucleoprotein core particles. Might play a role in transcription r…		Q9BQA1|B3KMW6|B4DP38|Q3LID2|Q53FU2|Q6JZZ5|Q96GK4|Q9BWY3|	MEP50_HUMAN
Q92522	H1FX	β-arrestin Interactor	Chromatin structure	Histone H1x	69	-	15	3.273e-05	-	-	adrenal gland glandular cells|appendix glandular cells|appendix lymphoid tissue|bone marrow hematopoietic cells|breast glandular cells|breast myoepithelial cells|bronchus respiratory epithelial cells|caudate glial cells|caudate neuronal cells|cerebellum Purkinje cells|cerebellum cells in granular layer|cerebellum cells in molecular layer|cerebral cortex glial cells|cerebral cortex neuronal cells|…	Histones H1 are necessary for the condensation of nucleosome chains into higher-order structures.	Belongs to the histone H1/H5 family.	Q92522|	H1X_HUMAN
P42166	TMPO	β-arrestin Interactor	Chromatin structure	Lamina-associated polypeptide 2, isoform alpha	75	-	14	5.647e-05	-	Rheumatoid Arthritis|Myocardial Ischemia|Cardiomyopathy, Dilated, 1t|LEFT VENTRICULAR NONCOMPACTION 10|LEFT VENTRICULAR NONCOMPACTION 8|	adrenal gland glandular cells|appendix glandular cells|appendix lymphoid tissue|bone marrow hematopoietic cells|breast adipocytes|breast glandular cells|breast myoepithelial cells|bronchus respiratory epithelial cells|caudate glial cells|caudate neuronal cells|cerebellum Purkinje cells|cerebellum cells in granular layer|cerebellum cells in molecular layer|cerebral cortex endothelial cells|cerebra…	May be involved in the structural organization of the nucleus and in the post-mitotic nuclear assembly. Plays an important role, together with LMNA, in the nuclear anchorage of RB1.	Belongs to the LEM family.	P42166|P08918|P08919|Q14860|Q16295|	LAP2A_HUMAN
Q14739	LBR	β-arrestin Interactor	Chromatin structure	Lamin-B receptor	19	-	14	3.407e-05	-	Arthritis|Primary biliary cirrhosis|Scleroderma|Dry Eye Syndromes|Gastroesophageal reflux disease|Keratoconjunctivitis Sicca|Biliary cirrhosis|Lymphedema|Micrognathism|Micromelia|Pelger-Huet Anomaly|Xerophthalmia|Xerostomia|Sclerodactyly|Polydactyly|Lymphangioma, Cystic|Congenital malrotation of intestine|Brachydactyly|Low set ears|Mandibular hypoplasia|Hypoplasia of the maxilla|Spade-like hand|C…	appendix glandular cells|appendix lymphoid tissue|bone marrow hematopoietic cells|caudate glial cells|colon glandular cells|duodenum glandular cells|endometrium cells in endometrial stroma|epididymis glandular cells|lymph node germinal center cells|lymph node non-germinal center cells|rectum glandular cells|small intestine glandular cells|smooth muscle smooth muscle cells|spleen cells in red pulp…	Anchors the lamina and the heterochromatin to the inner nuclear membrane.	Belongs to the ERG4/ERG24 family.	Q14739|B2R5P3|Q14740|Q53GU7|Q59FE6|	LBR_HUMAN
Q8TAQ2	SMARCC2	β-arrestin Interactor	Chromatin structure	SWI/SNF complex subunit SMARCC2	75	-	13	1.608e-05	-	-	adrenal gland glandular cells|appendix glandular cells|appendix lymphoid tissue|bone marrow hematopoietic cells|breast adipocytes|breast glandular cells|breast myoepithelial cells|bronchus respiratory epithelial cells|caudate glial cells|caudate neuronal cells|cerebellum Purkinje cells|cerebellum cells in granular layer|cerebellum cells in molecular layer|cerebral cortex endothelial cells|cerebra…	Involved in transcriptional activation and repression of select genes by chromatin remodeling (alteration of DNA-nucleosome topology). Component of SWI/SNF chromatin remodeling complexes that carry out key enzymatic activities, changing chromatin structure by altering DNA-histone contacts within a nucleosome in an ATP-dependent manner (PubMed:11018012). Can stimulate the ATPase activity of the ca…	Belongs to the SMARCC family.	Q8TAQ2|F8VTJ5|Q59GV3|Q92923|Q96E12|Q96GY4|	SMRC2_HUMAN
Q7Z4V5	HDGFL2	β-arrestin Interactor	Chromatin structure	Hepatoma-derived growth factor-related protein 2	75	-	11	0.00058474	-	-	adrenal gland glandular cells|appendix glandular cells|appendix lymphoid tissue|bone marrow hematopoietic cells|breast adipocytes|breast glandular cells|breast myoepithelial cells|bronchus respiratory epithelial cells|caudate glial cells|caudate neuronal cells|cerebellum Purkinje cells|cerebellum cells in granular layer|cerebellum cells in molecular layer|cerebral cortex endothelial cells|cerebra…	Involved in cellular growth control, through the regulation of cyclin D1 expression.	Belongs to the HDGF family.	Q7Z4V5|I3L080|K7EQZ6|Q96GI5|Q9BW08|	HDGR2_HUMAN
Q8IUE6	HIST2H2AB	β-arrestin Interactor	Chromatin structure	Histone H2A type 2-B	70	-	9	2.688e-05	-	-	adrenal gland glandular cells|appendix glandular cells|appendix lymphoid tissue|bone marrow hematopoietic cells|breast glandular cells|breast myoepithelial cells|bronchus respiratory epithelial cells|caudate glial cells|caudate neuronal cells|cerebellum Purkinje cells|cerebellum cells in granular layer|cerebellum cells in molecular layer|cerebral cortex glial cells|cerebral cortex neuronal cells|…	Core component of nucleosome. Nucleosomes wrap and compact DNA into chromatin, limiting DNA accessibility to the cellular machineries which require DNA as a template. Histones thereby play a central role in transcription regulation, DNA repair, DNA replication and chromosomal stability. DNA accessibility is regulated via a complex set of post-translational modifications of histones, also called h…	Belongs to the histone H2A family.	Q8IUE6|	H2A2B_HUMAN
Q9C005	DPY30	β-arrestin Interactor	Chromatin structure	Protein dpy-30 homolog	53	-	8	2.115e-05	-	-	adrenal gland glandular cells|bone marrow hematopoietic cells|breast glandular cells|breast myoepithelial cells|bronchus respiratory epithelial cells|cerebral cortex glial cells|cerebral cortex neuronal cells|cervix, uterine glandular cells|cervix, uterine squamous epithelial cells|colon endothelial cells|colon glandular cells|duodenum glandular cells|endometrium cells in endometrial stroma|endom…	As part of the MLL1/MLL complex, involved in the methylation of histone H3 at 'Lys-4', particularly trimethylation. Histone H3 'Lys-4' methylation represents a specific tag for epigenetic transcriptional activation. May play some role in histone H3 acetylation. In a teratocarcinoma cell, plays a crucial role in retinoic acid-induced differentiation along the neural lineage, regulating gene induct…	Belongs to the dpy-30 family.	Q9C005|D6W578|	DPY30_HUMAN
P0C0S8	HIST1H2AG	β-arrestin Interactor	Chromatin structure	Histone H2A type 1	73	-	7	9.75e-06	-	Adenoid Cystic Carcinoma|	adrenal gland glandular cells|appendix glandular cells|appendix lymphoid tissue|bone marrow hematopoietic cells|breast glandular cells|breast myoepithelial cells|bronchus respiratory epithelial cells|caudate glial cells|caudate neuronal cells|cerebellum Purkinje cells|cerebellum cells in granular layer|cerebellum cells in molecular layer|cerebral cortex glial cells|cerebral cortex neuronal cells|…	Core component of nucleosome. Nucleosomes wrap and compact DNA into chromatin, limiting DNA accessibility to the cellular machineries which require DNA as a template. Histones thereby play a central role in transcription regulation, DNA repair, DNA replication and chromosomal stability. DNA accessibility is regulated via a complex set of post-translational modifications of histones, also called h…	Belongs to the histone H2A family.	P0C0S8|P02261|Q2M1R2|Q76PA6|	H2A1_HUMAN
P23527	HIST1H2BO	β-arrestin Interactor	Chromatin structure	Histone H2B type 1-O	72	-	3	0	-	-	adrenal gland glandular cells|appendix glandular cells|appendix lymphoid tissue|bone marrow hematopoietic cells|breast adipocytes|breast glandular cells|breast myoepithelial cells|bronchus respiratory epithelial cells|caudate glial cells|caudate neuronal cells|cerebellum Purkinje cells|cerebellum cells in granular layer|cerebellum cells in molecular layer|cerebral cortex endothelial cells|cerebra…	Core component of nucleosome. Nucleosomes wrap and compact DNA into chromatin, limiting DNA accessibility to the cellular machineries which require DNA as a template. Histones thereby play a central role in transcription regulation, DNA repair, DNA replication and chromosomal stability. DNA accessibility is regulated via a complex set of post-translational modifications of histones, also called h…	Belongs to the histone H2B family.	P23527|Q3KPI7|Q8TCV6|	H2B1O_HUMAN
P60709	ACTB	β-arrestin Interactor	Cytoskeleton remodeling	Actin, cytoplasmic 1	34	-	94	0.00799779	-	Aortic Valve Stenosis|Bipolar Disorder|Blepharoptosis|Cleft Lip|Cleft Palate|Congenital ocular coloboma (disorder)|Cryptorchidism|Patent ductus arteriosus|Dysostoses|Epilepsy|Esophageal Achalasia|Sensorineural Hearing Loss (disorder)|Macroglossia|Macrostomia|Mental Retardation|Micromelia|Mild Mental Retardation|Degenerative polyarthritis|Schizophrenia|Cataract|Bicuspid aortic valve|Myocardial Isc…	appendix glandular cells|appendix lymphoid tissue|bone marrow hematopoietic cells|breast glandular cells|breast myoepithelial cells|cerebral cortex endothelial cells|colon endothelial cells|colon glandular cells|duodenum glandular cells|endometrium cells in endometrial stroma|endometrium glandular cells|epididymis glandular cells|gallbladder glandular cells|heart muscle myocytes|kidney cells in g…	Actins are highly conserved proteins that are involved in various types of cell motility and are ubiquitously expressed in all eukaryotic cells.	Belongs to the actin family.	P60709|P02570|P70514|P99021|Q11211|Q64316|Q75MN2|Q96B34|Q96HG5|	ACTB_HUMAN
P35579	MYH9	β-arrestin Interactor	Cytoskeleton remodeling	Myosin-9	49	3	79	0.00844854	-	Congenital cataract|Focal glomerulosclerosis|Hearing Loss, High-Frequency|Renal hypertension|Kidney Failure, Chronic|Myocardial Infarction|Nephritis|Hereditary nephritis|Schizophrenia|Cataract|Epstein syndrome (disorder)|Fechtner syndrome (disorder)|MACROTHROMBOCYTOPENIA AND PROGRESSIVE SENSORINEURAL DEAFNESS|Hearing loss, progressive sensorineural|SEBASTIAN SYNDROME|DEAFNESS, AUTOSOMAL DOMINANT …	adrenal gland glandular cells|appendix glandular cells|appendix lymphoid tissue|bone marrow hematopoietic cells|breast glandular cells|breast myoepithelial cells|bronchus respiratory epithelial cells|cerebral cortex endothelial cells|cervix, uterine glandular cells|cervix, uterine squamous epithelial cells|colon endothelial cells|colon glandular cells|duodenum glandular cells|endometrium glandula…	Cellular myosin that appears to play a role in cytokinesis, cell shape, and specialized functions such as secretion and capping. During cell spreading, plays an important role in cytoskeleton reorganization, focal contacts formation (in the margins but not the central part of spreading cells), and lamellipodial retraction; this function is mechanically antagonized by MYH10.	Belongs to the TRAFAC class myosin-kinesin ATPase superfamily. Myosin family.	P35579|A8K6E4|O60805|Q60FE2|Q86T83|	MYH9_HUMAN
P21333	FLNA	β-arrestin Interactor	Cytoskeleton remodeling	Filamin-A	27	7	78	0.00712739	-	Aortic Valve Insufficiency|Arachnodactyly|Blepharoptosis|Cleft Palate|Congenital clubfoot|Cryptorchidism|Phyllodes Tumor|Patent ductus arteriosus|Epilepsy|Exophthalmos|fibroma|Gastroesophageal reflux disease|Conductive hearing loss|Sensorineural Hearing Loss (disorder)|Heart failure|Congestive heart failure|Hip Dislocation, Congenital|Hydrocephalus|Hydronephrosis|Hypotrichosis|Intestinal Pseudo-O…	bone marrow hematopoietic cells|breast myoepithelial cells|cerebral cortex endothelial cells|colon endothelial cells|endometrium cells in endometrial stroma|endometrium glandular cells|epididymis glandular cells|esophagus squamous epithelial cells|kidney cells in glomeruli|kidney cells in tubules|liver bile duct cells|lung macrophages|lung pneumocytes|lymph node non-germinal center cells|nasophar…	Promotes orthogonal branching of actin filaments and links actin filaments to membrane glycoproteins. Anchors various transmembrane proteins to the actin cytoskeleton and serves as a scaffold for a wide range of cytoplasmic signaling proteins. Interaction with FLNA may allow neuroblast migration from the ventricular zone into the cortical plate. Tethers cell surface- localized furin, modulates it…	Belongs to the filamin family.	P21333|E9KL45|Q5HY53|Q5HY55|Q8NF52|	FLNA_HUMAN
Q9UHB6	LIMA1	β-arrestin Interactor	Cytoskeleton remodeling	LIM domain and actin-binding protein 1	48	7	54	0.00152966	-	-	adrenal gland glandular cells|appendix glandular cells|appendix lymphoid tissue|bone marrow hematopoietic cells|breast glandular cells|breast myoepithelial cells|bronchus respiratory epithelial cells|cervix, uterine glandular cells|cervix, uterine squamous epithelial cells|colon endothelial cells|colon glandular cells|colon peripheral nerve/ganglion|duodenum glandular cells|endometrium glandular …	Binds to actin monomers and filaments. Increases the number and size of actin stress fibers and inhibits membrane ruffling. Inhibits actin filament depolymerization. Bundles actin filaments, delays filament nucleation and reduces formation of branched filaments.		Q9UHB6|B2RB09|Q2TAN7|Q59FE8|Q9BVF2|Q9H8J1|Q9HBN5|Q9NX96|Q9NXC3|Q9NXU6|Q9P0H8|Q9UHB5|	LIMA1_HUMAN
Q16643	DBN1	β-arrestin Interactor	Cytoskeleton remodeling	Drebrin	36	9	49	0.00229475	-	Bipolar Disorder|Schizophrenia|	appendix glandular cells|bone marrow hematopoietic cells|breast glandular cells|breast myoepithelial cells|caudate neuronal cells|cerebellum cells in granular layer|cerebral cortex endothelial cells|cerebral cortex neuronal cells|cerebral cortex neuropil|colon endothelial cells|colon glandular cells|colon peripheral nerve/ganglion|endometrium cells in endometrial stroma|endometrium glandular cell…	Drebrins might play some role in cell migration, extension of neuronal processes and plasticity of dendrites. Required for actin polymerization at immunological synapses (IS) and for CXCR4 recruitment to IS.		Q16643|A8MV58|B2RBG0|Q9UFZ5|	DREB_HUMAN
P08670	VIM	β-arrestin Interactor	Cytoskeleton remodeling	Vimentin	45	3	42	0.00092752	-	Carcinosarcoma|Liver Cirrhosis|Liver Cirrhosis, Experimental|Nephrosis|Degenerative polyarthritis|Reperfusion Injury|synovial sarcoma|Motor Neuron Disease|Cataract|Malignant mesothelioma|Acute Coronary Syndrome|Cataract, Pulverulent|AMYOTROPHIC LATERAL SCLEROSIS 1|CATARACT 30|Diffuse nuclear cataract|Chemical and Drug Induced Liver Injury|	adrenal gland glandular cells|appendix lymphoid tissue|bone marrow hematopoietic cells|breast adipocytes|breast myoepithelial cells|bronchus respiratory epithelial cells|caudate glial cells|cerebral cortex endothelial cells|cerebral cortex glial cells|cervix, uterine glandular cells|cervix, uterine squamous epithelial cells|colon endothelial cells|colon peripheral nerve/ganglion|endometrium cells…	Vimentins are class-III intermediate filaments found in various non-epithelial cells, especially mesenchymal cells. Vimentin is attached to the nucleus, endoplasmic reticulum, and mitochondria, either laterally or terminally.	Belongs to the intermediate filament family.	P08670|B0YJC2|D3DRU4|Q15867|Q15868|Q15869|Q548L2|Q6LER9|Q8N850|Q96ML2|Q9NTM3|	VIME_HUMAN
Q13813	SPTAN1	β-arrestin Interactor	Cytoskeleton remodeling	Spectrin alpha chain, non-erythrocytic 1	73	3	40	0.000506	-	Epilepsy|Profound Mental Retardation|Severe mental retardation (I.Q. 20-34)|West Syndrome|Cerebral atrophy|Cerebellar degeneration|Hypoplasia of corpus callosum|Spastic Quadriplegia|Epileptic encephalopathy|Atrophy of cerebellum|EPILEPTIC ENCEPHALOPATHY, EARLY INFANTILE, 5|Profound intellectual disabilities|Supratentorial atrophy|Infratentorial atrophy|	adrenal gland glandular cells|appendix glandular cells|appendix lymphoid tissue|bone marrow hematopoietic cells|breast adipocytes|breast glandular cells|breast myoepithelial cells|bronchus respiratory epithelial cells|caudate glial cells|caudate neuronal cells|cerebellum Purkinje cells|cerebellum cells in granular layer|cerebellum cells in molecular layer|cerebral cortex endothelial cells|cerebra…	Fodrin, which seems to be involved in secretion, interacts with calmodulin in a calcium-dependent manner and is thus candidate for the calcium-dependent movement of the cytoskeleton at the membrane.	Belongs to the spectrin family.	Q13813|Q13186|Q15324|Q16606|Q59EF1|Q5VXV5|Q5VXV6|Q7Z6M5|Q9P0V0|	SPTN1_HUMAN
O00159	MYO1C	β-arrestin Interactor	Cytoskeleton remodeling	Unconventional myosin-Ic	70	3	39	0.00086398	-	Liver Cirrhosis, Experimental|	adrenal gland glandular cells|appendix glandular cells|appendix lymphoid tissue|breast adipocytes|breast glandular cells|breast myoepithelial cells|bronchus respiratory epithelial cells|caudate glial cells|caudate neuronal cells|cerebellum Purkinje cells|cerebral cortex endothelial cells|cerebral cortex glial cells|cerebral cortex neuronal cells|cervix, uterine glandular cells|cervix, uterine squ…	Myosins are actin-based motor molecules with ATPase activity. Unconventional myosins serve in intracellular movements. Their highly divergent tails are presumed to bind to membranous compartments, which would be moved relative to actin filaments. Involved in glucose transporter recycling in response to insulin by regulating movement of intracellular GLUT4-containing vesicles to the plasma membran…	Belongs to the TRAFAC class myosin-kinesin ATPase superfamily. Myosin family.	O00159|Q4LE56|Q6NVJ7|Q86Y95|	MYO1C_HUMAN
P47755	CAPZA2	β-arrestin Interactor	Cytoskeleton remodeling	F-actin-capping protein subunit alpha-2	45	3	36	0.00143172	-	-	adrenal gland glandular cells|appendix glandular cells|appendix lymphoid tissue|bone marrow hematopoietic cells|breast glandular cells|bronchus respiratory epithelial cells|caudate glial cells|cerebellum cells in molecular layer|cerebral cortex glial cells|cervix, uterine glandular cells|colon endothelial cells|colon glandular cells|duodenum glandular cells|endometrium cells in endometrial stroma…	F-actin-capping proteins bind in a Ca(2+)-independent manner to the fast growing ends of actin filaments (barbed end) thereby blocking the exchange of subunits at these ends. Unlike other capping proteins (such as gelsolin and severin), these proteins do not sever actin filaments.	Belongs to the F-actin-capping protein alpha subunit family.	P47755|B4DG50|	CAZA2_HUMAN
P23528	CFL1	β-arrestin Interactor	Cytoskeleton remodeling	Cofilin-1	45	7	36	0.00037859	-	Spina Bifida|Squamous cell carcinoma of esophagus|	adrenal gland glandular cells|appendix glandular cells|appendix lymphoid tissue|bone marrow hematopoietic cells|breast glandular cells|breast myoepithelial cells|bronchus respiratory epithelial cells|cervix, uterine glandular cells|colon endothelial cells|colon glandular cells|colon peripheral nerve/ganglion|duodenum glandular cells|endometrium glandular cells|epididymis glandular cells|esophagus…	Binds to F-actin and exhibits pH-sensitive F-actin depolymerizing activity. Regulates actin cytoskeleton dynamics. Important for normal progress through mitosis and normal cytokinesis. Plays a role in the regulation of cell morphology and cytoskeletal organization. Required for the up-regulation of atypical chemokine receptor ACKR2 from endosomal compartment to cell membrane, increasing its effic…	Belongs to the actin-binding proteins ADF family.	P23528|B3KUQ1|Q53Y87|Q9UCA2|	COF1_HUMAN
Q01082	SPTBN1	β-arrestin Interactor	Cytoskeleton remodeling	Spectrin beta chain, non-erythrocytic 1	74	9	34	0.00060157	-	-	adrenal gland glandular cells|appendix glandular cells|appendix lymphoid tissue|bone marrow hematopoietic cells|breast adipocytes|breast glandular cells|breast myoepithelial cells|bronchus respiratory epithelial cells|caudate glial cells|caudate neuronal cells|cerebellum Purkinje cells|cerebellum cells in granular layer|cerebellum cells in molecular layer|cerebral cortex endothelial cells|cerebra…	Fodrin, which seems to be involved in secretion, interacts with calmodulin in a calcium-dependent manner and is thus candidate for the calcium-dependent movement of the cytoskeleton at the membrane.	Belongs to the spectrin family.	Q01082|B2RP63|O60837|Q16057|Q53R99|Q59ER3|Q8IX99|	SPTB2_HUMAN
Q9Y2J2	EPB41L3	β-arrestin Interactor	Cytoskeleton remodeling	Band 4.1-like protein 3	25	7	30	0.00044773	-	-	adrenal gland glandular cells|appendix glandular cells|cerebellum Purkinje cells|cerebellum cells in granular layer|cerebellum cells in molecular layer|cerebral cortex glial cells|cerebral cortex neuronal cells|cerebral cortex neuropil|colon endothelial cells|colon glandular cells|colon peripheral nerve/ganglion|duodenum glandular cells|epididymis glandular cells|fallopian tube glandular cells|ga…	Tumor suppressor that inhibits cell proliferation and promotes apoptosis. Modulates the activity of protein arginine N- methyltransferases, including PRMT3 and PRMT5.		Q9Y2J2|B7Z4I5|F5GX05|O95713|Q9BRP5|	E41L3_HUMAN
Q14204	DYNC1H1	β-arrestin Interactor	Cytoskeleton remodeling	Cytoplasmic dynein 1 heavy chain 1	63	-	25	0.00029426	-	Epilepsy|Mental Retardation|Microcephaly|Spinal Muscular Atrophy|Plagiocephaly|Pachygyria|Congenital pes cavus|Mental deficiency|Plagiocephaly, Nonsynostotic|Spinal Muscular Atrophy, Childhood, Proximal, Autosomal Dominant|Malformations of Cortical Development|CHARCOT-MARIE-TOOTH DISEASE, AXONAL, TYPE 2O|MENTAL RETARDATION, AUTOSOMAL DOMINANT 13|Rhomboid shaped head|Flattening of head|Flattening …	adrenal gland glandular cells|appendix glandular cells|appendix lymphoid tissue|bone marrow hematopoietic cells|breast adipocytes|breast glandular cells|breast myoepithelial cells|bronchus respiratory epithelial cells|caudate neuronal cells|cerebellum Purkinje cells|cerebellum cells in granular layer|cerebellum cells in molecular layer|cerebral cortex endothelial cells|cerebral cortex glial cells…	Cytoplasmic dynein 1 acts as a motor for the intracellular retrograde motility of vesicles and organelles along microtubules. Dynein has ATPase activity; the force-producing power stroke is thought to occur on release of ADP. Plays a role in mitotic spindle assembly and metaphase plate congression (PubMed:27462074).	Belongs to the dynein heavy chain family.	Q14204|B0I1R0|Q6DKQ7|Q8WU28|Q92814|Q9Y4G5|	DYHC1_HUMAN
P35580	MYH10	β-arrestin Interactor	Cytoskeleton remodeling	Myosin-10	43	16	24	0.000451	-	Focal glomerulosclerosis|	adrenal gland glandular cells|appendix glandular cells|bronchus respiratory epithelial cells|caudate neuronal cells|cerebellum Purkinje cells|cerebral cortex neuronal cells|cerebral cortex neuropil|cervix, uterine glandular cells|colon glandular cells|duodenum glandular cells|endometrium cells in endometrial stroma|endometrium glandular cells|epididymis glandular cells|fallopian tube glandular ce…	Cellular myosin that appears to play a role in cytokinesis, cell shape, and specialized functions such as secretion and capping. Involved with LARP6 in the stabilization of type I collagen mRNAs for CO1A1 and CO1A2. During cell spreading, plays an important role in cytoskeleton reorganization, focal contacts formation (in the central part but not the margins of spreading cells), and lamellipodial…	Belongs to the TRAFAC class myosin-kinesin ATPase superfamily. Myosin family.	P35580|B2RWP9|D3DTS1|F8VTL3|Q12989|Q149N3|Q149N4|Q16087|Q4LE45|Q6PK16|Q9BWG0|	MYH10_HUMAN
P68133	ACTA1	β-arrestin Interactor	Cytoskeleton remodeling	Actin, alpha skeletal muscle	4	-	24	0.00025159	-	Arthrogryposis|Blepharoptosis|Left Ventricular Hypertrophy|Byzanthine arch palate|Zebra body myopathy|Bell Palsy|Eichsfeld type congenital muscular dystrophy|Nemaline Myopathy, Childhood Onset|Congenital Fiber Type Disproportion|Global developmental delay|Acquired scoliosis|Congenital pes cavus|Lumbar lordosis|Bulbar weakness|Nemaline myopathy 3|Pectus excavatum|Neonatal Hypotonia|Pediatric failu…	breast myoepithelial cells|heart muscle myocytes|skeletal muscle myocytes|smooth muscle smooth muscle cells|	Actins are highly conserved proteins that are involved in various types of cell motility and are ubiquitously expressed in all eukaryotic cells.	Belongs to the actin family.	P68133|P02568|P99020|Q5T8M9|	ACTS_HUMAN
Q14247	CTTN	β-arrestin Interactor	Cytoskeleton remodeling	Src substrate cortactin	74	-	24	0.00027499	-	Squamous cell carcinoma|Leukoplakia|Juvenile arthritis|	adrenal gland glandular cells|appendix glandular cells|appendix lymphoid tissue|bone marrow hematopoietic cells|breast adipocytes|breast glandular cells|breast myoepithelial cells|bronchus respiratory epithelial cells|caudate glial cells|caudate neuronal cells|cerebellum Purkinje cells|cerebellum cells in granular layer|cerebellum cells in molecular layer|cerebral cortex endothelial cells|cerebra…	Contributes to the organization of the actin cytoskeleton and cell shape (PubMed:21296879). Plays a role in the formation of lamellipodia and in cell migration. Plays a role in the regulation of neuron morphology, axon growth and formation of neuronal growth cones (By similarity). Through its interaction with CTTNBP2, involved in the regulation of neuronal spine density (By similarity). Plays a r…		Q14247|Q8N707|Q96H99|	SRC8_HUMAN
Q8WZ42	TTN	β-arrestin Interactor	Cytoskeleton remodeling	Titin	2	-	23	0.0002074	-	Blepharoptosis|Muscular Dystrophy|Foot-drop|Familial dilated cardiomyopathy|Bell Palsy|Eichsfeld type congenital muscular dystrophy|Myopathy, Centronuclear, Autosomal Recessive|MUSCULAR DYSTROPHY, LIMB-GIRDLE, TYPE 2J|TIBIAL MUSCULAR DYSTROPHY, TARDIVE|Cardiomyopathy, Dilated, 1g|CARDIOMYOPATHY, FAMILIAL HYPERTROPHIC, 9|Hereditary Myopathy with Early Respiratory Failure|Myopathy, Early-Onset, wit…	heart muscle myocytes|skeletal muscle myocytes|	Key component in the assembly and functioning of vertebrate striated muscles. By providing connections at the level of individual microfilaments, it contributes to the fine balance of forces between the two halves of the sarcomere. The size and extensibility of the cross-links are the main determinants of sarcomere extensibility properties of muscle. In non-muscle cells, seems to play a role in c…	Belongs to the protein kinase superfamily. CAMK Ser/Thr protein kinase family.	Q8WZ42|A6NKB1|E7EQE6|E7ET18|K7ENY1|Q10465|Q10466|Q15598|Q2XUS3|Q32Q60|Q4U1Z6|Q4ZG20|Q6NSG0|Q6PDB1|Q6PJP0|Q7KYM2|Q7KYN4|Q7KYN5|Q7LDM3|Q7Z2X3|Q8TCG8|Q8WZ51|Q8WZ52|Q8WZ53|Q8WZB3|Q92761|Q92762|Q9UD97|Q9UP84|Q9Y6L9|	TITIN_HUMAN
Q9NYL9	TMOD3	β-arrestin Interactor	Cytoskeleton remodeling	Tropomodulin-3	72	-	22	0.0001602	-	-	adrenal gland glandular cells|appendix glandular cells|appendix lymphoid tissue|bone marrow hematopoietic cells|breast adipocytes|breast glandular cells|breast myoepithelial cells|bronchus respiratory epithelial cells|caudate glial cells|caudate neuronal cells|cerebellum Purkinje cells|cerebellum cells in granular layer|cerebellum cells in molecular layer|cerebral cortex endothelial cells|cerebra…	Blocks the elongation and depolymerization of the actin filaments at the pointed end. The Tmod/TM complex contributes to the formation of the short actin protofilament, which in turn defines the geometry of the membrane skeleton (By similarity).	Belongs to the tropomodulin family.	Q9NYL9|B2R6G7|Q9NT43|Q9NZR0|	TMOD3_HUMAN
P06396	GSN	β-arrestin Interactor	Cytoskeleton remodeling	Gelsolin	40	7	19	0.00010238	-	Cutis Laxa|Liver Cirrhosis, Experimental|Mesothelioma|Osteoporosis|Paratuberculosis|Kidney Failure|Schizophrenia|Polyneuropathy|Familial Amyloid Polyneuropathy, Type V|Acute Coronary Syndrome|Bulbar weakness|Renal Insufficiency|Meretoja syndrome|Generalized elastolysis|Abnormality of the abdomen|Bulbar palsy|Chemical and Drug Induced Liver Injury|	adrenal gland glandular cells|bone marrow hematopoietic cells|breast glandular cells|bronchus respiratory epithelial cells|caudate glial cells|cerebellum cells in granular layer|cerebellum cells in molecular layer|cerebral cortex glial cells|cerebral cortex neuropil|cervix, uterine glandular cells|colon endothelial cells|colon glandular cells|duodenum glandular cells|endometrium cells in endometr…	Calcium-regulated, actin-modulating protein that binds to the plus (or barbed) ends of actin monomers or filaments, preventing monomer exchange (end-blocking or capping). It can promote the assembly of monomers into filaments (nucleation) as well as sever filaments already formed. Plays a role in ciliogenesis.	Belongs to the villin/gelsolin family.	P06396|A2A418|A8MUD1|A8MYN7|B7Z373|B7Z5V1|F5H1A8|Q5T0I2|Q8WVV7|	GELS_HUMAN
P60660	MYL6	β-arrestin Interactor	Cytoskeleton remodeling	Myosin light polypeptide 6	48	7	19	0.00029597	-	-	adrenal gland glandular cells|appendix glandular cells|appendix lymphoid tissue|bone marrow hematopoietic cells|breast glandular cells|breast myoepithelial cells|bronchus respiratory epithelial cells|cerebral cortex endothelial cells|colon endothelial cells|colon glandular cells|duodenum glandular cells|endometrium glandular cells|epididymis glandular cells|esophagus squamous epithelial cells|fal…	Regulatory light chain of myosin. Does not bind calcium.		P60660|P16475|P24572|P24573|Q12790|Q561V9|Q6IAZ0|Q6IPY5|	MYL6_HUMAN
P52907	CAPZA1	β-arrestin Interactor	Cytoskeleton remodeling	F-actin-capping protein subunit alpha-1	70	-	18	5.802e-05	-	Squamous cell carcinoma of esophagus|	adrenal gland glandular cells|appendix glandular cells|appendix lymphoid tissue|bone marrow hematopoietic cells|breast adipocytes|breast glandular cells|breast myoepithelial cells|bronchus respiratory epithelial cells|caudate neuronal cells|cerebellum Purkinje cells|cerebellum cells in granular layer|cerebral cortex endothelial cells|cerebral cortex glial cells|cerebral cortex neuropil|cervix, ut…	F-actin-capping proteins bind in a Ca(2+)-independent manner to the fast growing ends of actin filaments (barbed end) thereby blocking the exchange of subunits at these ends. Unlike other capping proteins (such as gelsolin and severin), these proteins do not sever actin filaments. May play a role in the formation of epithelial cell junctions.	Belongs to the F-actin-capping protein alpha subunit family.	P52907|Q53FQ6|Q6FHD5|	CAZA1_HUMAN
Q6WCQ1	MPRIP	β-arrestin Interactor	Cytoskeleton remodeling	Myosin phosphatase Rho-interacting protein	67	7	17	7.365e-05	-	-	adrenal gland glandular cells|appendix glandular cells|appendix lymphoid tissue|bone marrow hematopoietic cells|breast glandular cells|breast myoepithelial cells|bronchus respiratory epithelial cells|caudate glial cells|caudate neuronal cells|cerebellum Purkinje cells|cerebellum cells in granular layer|cerebellum cells in molecular layer|cerebral cortex endothelial cells|cerebral cortex glial cel…	Targets myosin phosphatase to the actin cytoskeleton. Required for the regulation of the actin cytoskeleton by RhoA and ROCK1. Depletion leads to an increased number of stress fibers in smooth muscle cells through stabilization of actin fibers by phosphorylated myosin. Overexpression of MRIP as well as its F- actin-binding region leads to disassembly of stress fibers in neuronal cells.		Q6WCQ1|Q3KQZ5|Q5FB94|Q6DHW2|Q7Z5Y2|Q8N390|Q96G40|	MPRIP_HUMAN
P46821	MAP1B	β-arrestin Interactor	Cytoskeleton remodeling	Microtubule-associated protein 1B	26	16	15	0.00069471	-	-	adrenal gland glandular cells|bronchus respiratory epithelial cells|cerebellum Purkinje cells|cerebellum cells in granular layer|cerebellum cells in molecular layer|cerebral cortex endothelial cells|cerebral cortex glial cells|cerebral cortex neuronal cells|cerebral cortex neuropil|cervix, uterine squamous epithelial cells|colon peripheral nerve/ganglion|fallopian tube glandular cells|hippocampus…	Facilitates tyrosination of alpha-tubulin in neuronal microtubules (By similarity). Phosphorylated MAP1B may play a role in the cytoskeletal changes that accompany neurite extension. Possibly MAP1B binds to at least two tubulin subunits in the polymer, and this bridging of subunits might be involved in nucleating microtubule polymerization and in stabilizing microtubules. Acts as a positive cofac…	Belongs to the MAP1 family.	P46821|A2BDK5|	MAP1B_HUMAN
P67936	TPM4	β-arrestin Interactor	Cytoskeleton remodeling	Tropomyosin alpha-4 chain	69	-	15	5.701e-05	-	Asbestosis|Liver Cirrhosis, Experimental|Osteoporosis|Inflammatory Myofibroblastic Tumor|Acute Coronary Syndrome|	adrenal gland glandular cells|appendix glandular cells|appendix lymphoid tissue|bone marrow hematopoietic cells|breast glandular cells|breast myoepithelial cells|bronchus respiratory epithelial cells|caudate neuronal cells|cerebellum Purkinje cells|cerebellum cells in granular layer|cerebellum cells in molecular layer|cerebral cortex endothelial cells|cerebral cortex glial cells|cerebral cortex n…	Binds to actin filaments in muscle and non-muscle cells. Plays a central role, in association with the troponin complex, in the calcium dependent regulation of vertebrate striated muscle contraction. Smooth muscle contraction is regulated by interaction with caldesmon. In non-muscle cells is implicated in stabilizing cytoskeleton actin filaments (By similarity). Binds calcium (PubMed:1836432).	Belongs to the tropomyosin family.	P67936|P07226|Q15659|Q5U0D9|Q9BU85|Q9H8Q3|Q9UCS1|Q9UCS2|Q9UCS3|Q9UCS4|	TPM4_HUMAN
P68032	ACTC1	β-arrestin Interactor	Cytoskeleton remodeling	Actin, alpha cardiac muscle 1	3	7	13	0.00010606	-	Hypertrophic Cardiomyopathy|Heart failure|Congestive heart failure|Ostium secundum atrial septal defect|Left ventricular noncompaction|Cardiomyopathy, Familial Hypertrophic, 11|Atrial Septal Defect 5|CARDIOMYOPATHY, DILATED, 1R|Cardiomyopathy, Familial Hypertrophic, 1 (disorder)|LEFT VENTRICULAR NONCOMPACTION 10|LEFT VENTRICULAR NONCOMPACTION 8|	heart muscle myocytes|skeletal muscle myocytes|smooth muscle smooth muscle cells|	Actins are highly conserved proteins that are involved in various types of cell motility and are ubiquitously expressed in all eukaryotic cells.	Belongs to the actin family.	P68032|P04270|	ACTC_HUMAN
O14950	MYL12B	β-arrestin Interactor	Cytoskeleton remodeling	Myosin regulatory light chain 12B	5	-	12	3.059e-05	-	-	breast glandular cells|breast myoepithelial cells|heart muscle myocytes|skeletal muscle myocytes|smooth muscle smooth muscle cells|	Myosin regulatory subunit that plays an important role in regulation of both smooth muscle and nonmuscle cell contractile activity via its phosphorylation. Phosphorylation triggers actin polymerization in vascular smooth muscle. Implicated in cytokinesis, receptor capping, and cell locomotion.		O14950|D3DUH6|Q13182|Q7Z5Z4|	ML12B_HUMAN
P53667	LIMK1	β-arrestin Interactor	Cytoskeleton remodeling	LIM domain kinase 1	69	-	12	4.164e-05	-	Anxiety|Supravalvular aortic stenosis|Autistic Disorder|Blepharophimosis|Bunion|Brain Ischemia|Depressive disorder|Diverticular disease of colon|Hallux Valgus|Sensorineural Hearing Loss (disorder)|Hypercalcemia|Hypertension, Renovascular|Hypodontia|Macroglossia|Macrostomia|Malocclusion|Mental Retardation|Micrognathism|Mitral Valve Prolapse Syndrome|Obesity|Obsessive-Compulsive Disorder|Kidney Fai…	adrenal gland glandular cells|appendix glandular cells|appendix lymphoid tissue|bone marrow hematopoietic cells|breast adipocytes|breast glandular cells|breast myoepithelial cells|bronchus respiratory epithelial cells|caudate glial cells|caudate neuronal cells|cerebellum Purkinje cells|cerebellum cells in granular layer|cerebellum cells in molecular layer|cerebral cortex glial cells|cerebral cort…	Serine/threonine-protein kinase that plays an essential role in the regulation of actin filament dynamics. Acts downstream of several Rho family GTPase signal transduction pathways. Activated by upstream kinases including ROCK1, PAK1 and PAK4, which phosphorylate LIMK1 on a threonine residue located in its activation loop. LIMK1 subsequently phosphorylates and inactivates the actin binding/depoly…	Belongs to the protein kinase superfamily. TKL Ser/Thr protein kinase family.	P53667|B7Z6I8|D3DXF4|D3DXF5|O15283|Q15820|Q15821|Q75MU3|Q9Y5Q1|	LIMK1_HUMAN
Q86UP2	KTN1	β-arrestin Interactor	Cytoskeleton remodeling	Kinectin	75	-	11	0.00067637	-	Liver Cirrhosis, Experimental|	adrenal gland glandular cells|appendix glandular cells|appendix lymphoid tissue|bone marrow hematopoietic cells|breast adipocytes|breast glandular cells|breast myoepithelial cells|bronchus respiratory epithelial cells|caudate glial cells|caudate neuronal cells|cerebellum Purkinje cells|cerebellum cells in granular layer|cerebellum cells in molecular layer|cerebral cortex endothelial cells|cerebra…	Receptor for kinesin thus involved in kinesin-driven vesicle motility. Accumulates in integrin-based adhesion complexes (IAC) upon integrin aggregation by fibronectin.	Belongs to the kinectin family.	Q86UP2|B4DZ88|Q13999|Q14707|Q15387|Q17RZ5|Q5GGW3|Q86W57|	KTN1_HUMAN
Q05682	CALD1	β-arrestin Interactor	Cytoskeleton remodeling	Caldesmon	28	-	10	1.053e-05	-	Rheumatoid Arthritis|Juvenile arthritis|	bone marrow hematopoietic cells|breast adipocytes|breast glandular cells|breast myoepithelial cells|cerebral cortex endothelial cells|cervix, uterine squamous epithelial cells|colon endothelial cells|endometrium cells in endometrial stroma|endometrium glandular cells|epididymis glandular cells|gallbladder glandular cells|kidney cells in tubules|liver hepatocytes|lung macrophages|lung pneumocytes|…	Actin- and myosin-binding protein implicated in the regulation of actomyosin interactions in smooth muscle and nonmuscle cells (could act as a bridge between myosin and actin filaments). Stimulates actin binding of tropomyosin which increases the stabilization of actin filament structure. In muscle tissues, inhibits the actomyosin ATPase by binding to F-actin. This inhibition is attenuated by cal…	Belongs to the caldesmon family.	Q05682|A8K0X1|Q13978|Q13979|Q14741|Q14742|Q9UD91|	CALD1_HUMAN
Q12967	RALGDS	β-arrestin Interactor	Cytoskeleton remodeling	Ral guanine nucleotide dissociation stimulator	51	-	9	0.00023828	-	-	adrenal gland glandular cells|appendix lymphoid tissue|breast adipocytes|breast glandular cells|bronchus respiratory epithelial cells|caudate glial cells|cerebellum Purkinje cells|cerebellum cells in granular layer|cerebral cortex endothelial cells|cerebral cortex glial cells|cerebral cortex neuronal cells|cerebral cortex neuropil|cervix, uterine glandular cells|cervix, uterine squamous epithelia…	Stimulates the dissociation of GDP from the Ras-related RalA and RalB GTPases which allows GTP binding and activation of the GTPases. Interacts and acts as an effector molecule for R-Ras, H-Ras, K-Ras, and Rap.		Q12967|B7Z753|E7ER93|E7ERZ0|Q5T7V4|Q6KH11|Q6PCE1|Q6ZSD5|Q9HAX7|Q9HAY1|Q9HCT1|Q9P2N8|	GNDS_HUMAN
P11532	DMD	β-arrestin Interactor	Cytoskeleton remodeling	Dystrophin	3	-	8	0.00011872	-	Contracture|Contracture of joint|Muscular Dystrophy, Duchenne|Heart failure|Congestive heart failure|leiomyosarcoma|Mental Retardation|Mild Mental Retardation|Muscular Dystrophy|Muscular Dystrophy, Animal|Polycystic Ovary Syndrome|Status Epilepticus|Rhabdomyosarcoma, Embryonal|Flexion contracture|Acquired scoliosis|Becker Muscular Dystrophy|Mental deficiency|Respiratory Failure|Flexion contractur…	cerebral cortex neuropil|heart muscle myocytes|skeletal muscle myocytes|	Anchors the extracellular matrix to the cytoskeleton via F-actin. Ligand for dystroglycan. Component of the dystrophin- associated glycoprotein complex which accumulates at the neuromuscular junction (NMJ) and at a variety of synapses in the peripheral and central nervous systems and has a structural function in stabilizing the sarcolemma. Also implicated in signaling events and synaptic transmis…		P11532|E9PDN1|Q02295|Q14169|Q14170|Q5JYU0|Q6NSJ9|Q7KZ48|Q8N754|Q9UCW3|Q9UCW4|	DMD_HUMAN
Q9Y496	KIF3A	β-arrestin Interactor	Cytoskeleton remodeling	Kinesin-like protein KIF3A	32	-	8	2.293e-05	-	Asthma|Polydactyly|	adrenal gland glandular cells|appendix glandular cells|bone marrow hematopoietic cells|bronchus respiratory epithelial cells|caudate neuronal cells|cerebellum Purkinje cells|cerebellum cells in molecular layer|cerebral cortex glial cells|cerebral cortex neuronal cells|cerebral cortex neuropil|colon glandular cells|colon peripheral nerve/ganglion|epididymis glandular cells|fallopian tube glandular…	Microtubule-based anterograde translocator for membranous organelles. Plus end-directed microtubule sliding activity in vitro. Plays a role in primary cilia formation. Plays a role in centriole cohesion and subdistal appendage organization and function. Regulates the formation of the subdistal appendage via recruitement of DCTN1 to the centriole. Also required for ciliary basal feet formation and…	Belongs to the TRAFAC class myosin-kinesin ATPase superfamily. Kinesin family. Kinesin II subfamily.	Q9Y496|A8MSW9|Q59EN1|Q86XE9|Q9Y6V4|	KIF3A_HUMAN
Q9BPX5	ARPC5L	β-arrestin Interactor	Cytoskeleton remodeling	Actin-related protein 2/3 complex subunit 5-like protein	46	7	7	3.044e-05	-	-	adrenal gland glandular cells|appendix glandular cells|appendix lymphoid tissue|bone marrow hematopoietic cells|breast glandular cells|breast myoepithelial cells|bronchus respiratory epithelial cells|caudate glial cells|caudate neuronal cells|cerebellum Purkinje cells|cerebellum cells in molecular layer|cerebral cortex neuronal cells|colon glandular cells|colon peripheral nerve/ganglion|duodenum …	May function as component of the Arp2/3 complex which is involved in regulation of actin polymerization and together with an activating nucleation-promoting factor (NPF) mediates the formation of branched actin networks.	Belongs to the ARPC5 family.	Q9BPX5|Q7Z523|	ARP5L_HUMAN
Q16352	INA	β-arrestin Interactor	Cytoskeleton remodeling	Alpha-internexin	6	-	7	1.299e-05	-	AMYOTROPHIC LATERAL SCLEROSIS 1|	adrenal gland glandular cells|caudate neuronal cells|cerebellum Purkinje cells|cerebral cortex neuronal cells|cerebral cortex neuropil|hippocampus neuronal cells|	Class-IV neuronal intermediate filament that is able to self-assemble. It is involved in the morphogenesis of neurons. It may form an independent structural network without the involvement of other neurofilaments or it may cooperate with NF-L to form the filamentous backbone to which NF-M and NF-H attach to form the cross-bridges.	Belongs to the intermediate filament family.	Q16352|B1AQK0|Q9BRC5|	AINX_HUMAN
O15511	ARPC5	β-arrestin Interactor	Cytoskeleton remodeling	Actin-related protein 2/3 complex subunit 5	47	-	6	3.36e-05	-	-	adrenal gland glandular cells|appendix glandular cells|appendix lymphoid tissue|bone marrow hematopoietic cells|breast glandular cells|breast myoepithelial cells|bronchus respiratory epithelial cells|caudate glial cells|caudate neuronal cells|cerebellum Purkinje cells|cerebellum cells in molecular layer|cerebral cortex neuronal cells|colon glandular cells|colon peripheral nerve/ganglion|duodenum …	Functions as component of the Arp2/3 complex which is involved in regulation of actin polymerization and together with an activating nucleation-promoting factor (NPF) mediates the formation of branched actin networks.	Belongs to the ARPC5 family.	O15511|A6NEC4|Q6PG42|	ARPC5_HUMAN
P12882	MYH1	β-arrestin Interactor	Cytoskeleton remodeling	Myosin-1	2	-	4	3.91e-06	-	-	heart muscle myocytes|skeletal muscle myocytes|	Muscle contraction.	Belongs to the TRAFAC class myosin-kinesin ATPase superfamily. Myosin family.	P12882|Q14CA4|Q9Y622|	MYH1_HUMAN
Q9ULI4	KIF26A	β-arrestin Interactor	Cytoskeleton remodeling	Kinesin-like protein KIF26A	-	-	4	6.77e-06	-	-	-	Atypical kinesin that plays a key role in enteric neuron development. Acts by repressing a cell growth signaling pathway in the enteric nervous system development, possibly via its interaction with GRB2 that prevents GRB2-binding to SHC, thereby attenating the GDNF-Ret signaling. Binds to microtubules but lacks microtubule-based motility due to the absence of ATPase activity (By similarity).	Belongs to the TRAFAC class myosin-kinesin ATPase superfamily. Kinesin family. KIF26 subfamily.	Q9ULI4|Q8TAZ7|Q96GK3|Q9UFL3|	KI26A_HUMAN
P63267	ACTG2	β-arrestin Interactor	Cytoskeleton remodeling	Actin, gamma-enteric smooth muscle	22	-	3	3.6e-07	-	Vesico-Ureteral Reflux|Visceral Myopathy|Congenital malrotation of intestine|Microcolon|Visceral Myopathy, Familial|Dilatation of ureter|Megacystis microcolon intestinal hypoperistalsis syndrome|Multicystic Dysplastic Kidney|	appendix lymphoid tissue|breast glandular cells|breast myoepithelial cells|colon endothelial cells|colon glandular cells|duodenum glandular cells|epididymis glandular cells|gallbladder glandular cells|kidney cells in tubules|liver bile duct cells|lung macrophages|lymph node germinal center cells|lymph node non-germinal center cells|pancreas exocrine glandular cells|rectum glandular cells|small in…	Actins are highly conserved proteins that are involved in various types of cell motility and are ubiquitously expressed in all eukaryotic cells.	Belongs to the actin family.	P63267|B2R7E7|B4E315|D6W5H8|E9PG30|P12718|Q504R1|Q6FI22|	ACTH_HUMAN
Q96GD0	PDXP	β-arrestin Interactor	Cytoskeleton remodeling	Pyridoxal phosphate phosphatase	11	-	2	0	-	-	caudate glial cells|caudate neuronal cells|cerebellum Purkinje cells|cerebellum cells in granular layer|cerebral cortex glial cells|cerebral cortex neuronal cells|cerebral cortex neuropil|hippocampus glial cells|hippocampus neuronal cells|spleen cells in white pulp|testis cells in seminiferous ducts|	Protein serine phosphatase that dephosphorylates 'Ser-3' in cofilin and probably also dephosphorylates phospho-serine residues in DSTN. Regulates cofilin-dependent actin cytoskeleton reorganization. Required for normal progress through mitosis and normal cytokinesis. Does not dephosphorylate phospho-threonines in LIMK1. Does not dephosphorylate peptides containing phospho- tyrosine (PubMed:155802…	Belongs to the HAD-like hydrolase superfamily.	Q96GD0|Q9UGY2|	PLPP_HUMAN
Q99661	KIF2C	β-arrestin Interactor	Cytoskeleton remodeling	Kinesin-like protein KIF2C	-	-	2	2.69e-06	-	Contact Dermatitis|	-	In complex with KIF18B, constitutes the major microtubule plus-end depolymerizing activity in mitotic cells (PubMed:21820309). Regulates the turnover of microtubules at the kinetochore and functions in chromosome segregation during mitosis (PubMed:19060894). Plays a role in chromosome congression and is required for the lateral to end-on conversion of the chromosome- microtubule attachment (PubMe…	Belongs to the TRAFAC class myosin-kinesin ATPase superfamily. Kinesin family. MCAK/KIF2 subfamily.	Q99661|B3ITR9|Q5JR88|Q6ICU1|Q96C18|Q96HB8|Q9BWV8|	KIF2C_HUMAN
Q8TD57	DNAH3	β-arrestin Interactor	Cytoskeleton remodeling	Dynein heavy chain 3, axonemal	-	-	1	0	-	-	-	Force generating protein of respiratory cilia. Produces force towards the minus ends of microtubules. Dynein has ATPase activity; the force-producing power stroke is thought to occur on release of ADP. Involved in sperm motility; implicated in sperm flagellar assembly (By similarity).	Belongs to the dynein heavy chain family.	Q8TD57|O00437|O15437|O43326|Q3C0H2|Q8WUP9|Q9UEM3|Q9UEM5|Q9UG35|	DYH3_HUMAN
Q9UPA5	BSN	β-arrestin Interactor	Cytoskeleton remodeling	Protein bassoon	5	-	1	0	-	-	cerebral cortex endothelial cells|cerebral cortex neuronal cells|cerebral cortex neuropil|spleen cells in red pulp|testis cells in seminiferous ducts|	Is thought to be involved in the organization of the cytomatrix at the nerve terminals active zone (CAZ) which regulates neurotransmitter release. Seems to act through binding to ERC2/CAST1. Essential in regulated neurotransmitter release from a subset of brain glutamatergic synapses. Involved in the formation of the retinal photoreceptor ribbon synapses (By similarity).		Q9UPA5|O43161|Q7LGH3|	BSN_HUMAN
P46531	NOTCH1	β-arrestin Interactor	Membrane receptor	Neurogenic locus notch homolog protein 1	68	-	42	0.00115459	-	Aortic Valve Stenosis|Astrocytoma|Uterine Cervical Neoplasm|Adenoid Cystic Carcinoma|Glioblastoma|Hemangioma, Cavernous|Hydrocephalus|Leukemia, T-Cell|Microphthalmos|Scoliosis, unspecified|Strabismus|Syndactyly|Tetralogy of Fallot|Cataract|Bicuspid aortic valve|Right Ventricular Hypertrophy|Syndactyly of fingers|Brachydactyly|Claw hand|Cutis marmorata|Adams Oliver syndrome|Congenital absence of h…	adrenal gland glandular cells|appendix glandular cells|bone marrow hematopoietic cells|breast adipocytes|breast glandular cells|breast myoepithelial cells|bronchus respiratory epithelial cells|caudate glial cells|caudate neuronal cells|cerebellum Purkinje cells|cerebellum cells in granular layer|cerebellum cells in molecular layer|cerebral cortex endothelial cells|cerebral cortex glial cells|cere…	Functions as a receptor for membrane-bound ligands Jagged-1 (JAG1), Jagged-2 (JAG2) and Delta-1 (DLL1) to regulate cell-fate determination. Upon ligand activation through the released notch intracellular domain (NICD) it forms a transcriptional activator complex with RBPJ/RBPSUH and activates genes of the enhancer of split locus. Affects the implementation of differentiation, proliferation and ap…	Belongs to the NOTCH family.	P46531|Q59ED8|Q5SXM3|	NOTC1_HUMAN
P08069	IGF1R	β-arrestin Interactor	Membrane receptor	Insulin-like growth factor 1 receptor	39	6	33	0.00167522	-	Alzheimer's Disease|Anxiety|Mental Retardation|Parkinson Disease|Adrenocortical carcinoma|Congenital diaphragmatic hernia|Speech Delay|Congenital clinodactyly|Lewy Body Disease|Mental deficiency|facial deformity|Insulin-Like Growth Factor I, Resistance To|Pectus excavatum|Liver carcinoma|Juvenile arthritis|Anxiety disease|Abnormality of the rib cage|	adrenal gland glandular cells|appendix glandular cells|breast glandular cells|breast myoepithelial cells|bronchus respiratory epithelial cells|cervix, uterine glandular cells|colon glandular cells|duodenum glandular cells|endometrium glandular cells|epididymis glandular cells|esophagus squamous epithelial cells|fallopian tube glandular cells|gallbladder glandular cells|heart muscle myocytes|kidne…	Receptor tyrosine kinase which mediates actions of insulin-like growth factor 1 (IGF1). Binds IGF1 with high affinity and IGF2 and insulin (INS) with a lower affinity. The activated IGF1R is involved in cell growth and survival control. IGF1R is crucial for tumor transformation and survival of malignant cell. Ligand binding activates the receptor kinase, leading to receptor autophosphorylation, a…	Belongs to the protein kinase superfamily. Tyr protein kinase family. Insulin receptor subfamily.	P08069|B1B5Y2|Q14CV2|Q9UCC0|	IGF1R_HUMAN
P20963	CD247	β-arrestin Interactor	Membrane receptor	T-cell surface glycoprotein CD3 zeta chain	9	7	30	0.00122407	-	Eosinophilia|Iridocyclitis|Malocclusion|Systemic Scleroderma|Pauciarticular juvenile rheumatoid arthritis|Polyarthritis|Protracted diarrhea|Severe Combined Immunodeficiency, Autosomal Recessive, T Cell Negative, B Cell Positive, NK Cell Positive|Immunodeficiency due to Defect in CD3-Zeta|T-Lymphocytopenia|Juvenile rheumatoid arthritis|Angle class 2 malocclusion|	appendix lymphoid tissue|bone marrow hematopoietic cells|lung pneumocytes|lymph node germinal center cells|lymph node non-germinal center cells|spleen cells in red pulp|spleen cells in white pulp|tonsil germinal center cells|tonsil non-germinal center cells|	Part of the TCR-CD3 complex present on T-lymphocyte cell surface that plays an essential role in adaptive immune response. When antigen presenting cells (APCs) activate T-cell receptor (TCR), TCR-mediated signals are transmitted across the cell membrane by the CD3 chains CD3D, CD3E, CD3G and CD3Z. All CD3 chains contain immunoreceptor tyrosine-based activation motifs (ITAMs) in their cytoplasmic …	Belongs to the CD3Z/FCER1G family.	P20963|B1AK49|Q5VX13|Q8TAX4|	CD3Z_HUMAN
P17813	ENG	β-arrestin Interactor	Membrane receptor	Endoglin	3	-	2	0	-	Anemia|Brain Abscess|Cholecystitis|Epilepsy|Hemangioma, Cavernous|Hypertension, Portal|Liver Cirrhosis|Polycythemia|Subarachnoid Hemorrhage|Hereditary hemorrhagic telangiectasia|Iron-Refractory Iron Deficiency Anemia|Conjunctival telangiectasis|Aneurysm of celiac artery|Familial primary pulmonary hypertension|Juvenile polyposis syndrome|Spinal arteriovenous malformation|Arteriovenous malformation…	cerebral cortex endothelial cells|kidney cells in glomeruli|placenta trophoblastic cells|	Vascular endothelium glycoprotein that plays an important role in the regulation of angiogenesis (PubMed:21737454, PubMed:23300529). Required for normal structure and integrity of adult vasculature (PubMed:7894484). Regulates the migration of vascular endothelial cells (PubMed:17540773). Required for normal extraembryonic angiogenesis and for embryonic heart development (By similarity). May regul…		P17813|Q14248|Q14926|Q5T9C0|	EGLN_HUMAN
Q99706	KIR2DL4	β-arrestin Interactor	Membrane receptor	Killer cell immunoglobulin-like receptor 2DL4	-	-	2	0	-	-	-	Receptor on natural killer (NK) cells for HLA-C alleles. Inhibits the activity of NK cells thus preventing cell lysis.	Belongs to the immunoglobulin superfamily.	Q99706|A8W795|O14621|O14622|O14623|O14624|O43534|P78400|P78401|Q8N738|Q99559|Q99560|Q99561|Q99562|Q9UQJ7|	KI2L4_HUMAN
P43628	KIR2DL3	β-arrestin Interactor	Membrane receptor	Killer cell immunoglobulin-like receptor 2DL3	-	-	5	0.0027309	-	-	-	Receptor on natural killer (NK) cells for HLA-C alleles (HLA-Cw1, HLA-Cw3 and HLA-Cw7). Inhibits the activity of NK cells thus preventing cell lysis.	Belongs to the immunoglobulin superfamily.	P43628|O43472|P78402|Q14944|Q14945|Q9UM51|Q9UQ70|	KI2L3_HUMAN
P43626	KIR2DL1	β-arrestin Interactor	Membrane receptor	Killer cell immunoglobulin-like receptor 2DL1	-	-	3	0	-	-	-	Receptor on natural killer (NK) cells for some HLA-C alleles such as w4 and w6. Inhibits the activity of NK cells thus preventing cell lysis.	Belongs to the immunoglobulin superfamily.	P43626|O43470|Q32WE6|Q6IST4|	KI2L1_HUMAN
Q03167	TGFBR3	β-arrestin Interactor	Membrane receptor	Transforming growth factor beta receptor type 3	35	-	4	0.00081839	-	ANEURYSM, INTRACRANIAL BERRY, 1 (disorder)|	adrenal gland glandular cells|breast adipocytes|breast glandular cells|bronchus respiratory epithelial cells|caudate glial cells|caudate neuronal cells|cerebral cortex glial cells|cerebral cortex neuronal cells|cervix, uterine squamous epithelial cells|colon endothelial cells|epididymis glandular cells|esophagus squamous epithelial cells|gallbladder glandular cells|heart muscle myocytes|hippocamp…	Binds to TGF-beta. Could be involved in capturing and retaining TGF-beta for presentation to the signaling receptors.		Q03167|A0AUW8|A8K5N0|B9EG88|Q5T2T4|Q5U731|Q9UGI2|	TGBR3_HUMAN
P05305	EDN1	β-arrestin Interactor	Membrane receptor	Endothelin-1	58	-	4	8.826e-05	-	Asthma|Atrial Fibrillation|Diabetes Mellitus, Experimental|Diabetes Mellitus, Non-Insulin-Dependent|Focal glomerulosclerosis|Heart failure|Hepatorenal Syndrome|Hypercholesterolemia|Liver Cirrhosis, Experimental|Micrognathism|Nephrosis|Parkinson Disease|Peptic Ulcer|Pulmonary Fibrosis|Reperfusion Injury|Respiratory Distress Syndrome, Adult|Subarachnoid Hemorrhage|Unipolar Depression|Left Ventricul…	adrenal gland glandular cells|bone marrow hematopoietic cells|breast adipocytes|breast glandular cells|breast myoepithelial cells|bronchus respiratory epithelial cells|caudate neuronal cells|cerebellum Purkinje cells|cerebellum cells in granular layer|cerebral cortex glial cells|cerebral cortex neuronal cells|colon endothelial cells|colon glandular cells|colon peripheral nerve/ganglion|duodenum g…	Endothelins are endothelium-derived vasoconstrictor peptides.	Belongs to the endothelin/sarafotoxin family.	P05305|Q96DA1|	EDN1_HUMAN
Q96P20	NLRP3	β-arrestin Interactor	Intracellular receptor	NACHT, LRR and PYD domains-containing protein 3	40	-	10	0.0001284	-	Crohn Disease|Pulmonary Fibrosis|Muckle-Wells Syndrome|Familial cold urticaria|Chronic Infantile Neurological, Cutaneous, and Articular Syndrome|Cryopyrin-Associated Periodic Syndromes|	adrenal gland glandular cells|appendix glandular cells|bone marrow hematopoietic cells|breast glandular cells|bronchus respiratory epithelial cells|cerebral cortex endothelial cells|cerebral cortex glial cells|cerebral cortex neuronal cells|cervix, uterine squamous epithelial cells|colon glandular cells|duodenum glandular cells|endometrium cells in endometrial stroma|endometrium glandular cells|e…	As the sensor component of the NLRP3 inflammasome, plays a crucial role in innate immunity and inflammation. In response to pathogens and other damage-associated signals, initiates the formation of the inflammasome polymeric complex, made of NLRP3, PYCARD and CASP1 (and possibly CASP4 and CASP5). Recruitment of proCASP1 to the inflammasome promotes its activation and CASP1- catalyzed IL1B and IL1…	Belongs to the NLRP family.	Q96P20|A0A024R5Q0|B2RC97|B7ZKS9|B7ZKT2|B7ZKT3|O75434|Q17RS2|Q59H68|Q5JQS8|Q5JQS9|Q6TG35|Q8TCW0|Q8TEU9|Q8WXH9|	NLRP3_HUMAN
P59046	NLRP12	β-arrestin Interactor	Intracellular receptor	NACHT, LRR and PYD domains-containing protein 12	54	-	8	1.83e-05	-	Renal Cell Carcinoma|Familial Cold Autoinflammatory Syndrome 2|	appendix glandular cells|bone marrow hematopoietic cells|breast glandular cells|breast myoepithelial cells|bronchus respiratory epithelial cells|caudate neuronal cells|cerebellum Purkinje cells|cerebellum cells in granular layer|cerebellum cells in molecular layer|cerebral cortex neuronal cells|cervix, uterine glandular cells|colon glandular cells|colon peripheral nerve/ganglion|duodenum glandula…	May mediate activation of CASP1 via ASC and promote activation of NF-kappa-B via IKK.	Belongs to the NLRP family.	P59046|A8MTQ2|B3KTE7|Q8NEU4|Q9BY26|	NAL12_HUMAN
Q9C000	NLRP1	β-arrestin Interactor	Intracellular receptor	NACHT, LRR and PYD domains-containing protein 1	46	-	5	7.184e-05	-	Ectodermal Dysplasia|Palmoplantar Keratosis|Parakeratosis|Corneal Neovascularization|VITILIGO-ASSOCIATED MULTIPLE AUTOIMMUNE DISEASE SUSCEPTIBILITY 1 (finding)|CORNEAL INTRAEPITHELIAL DYSKERATOSIS AND ECTODERMAL DYSPLASIA|	adrenal gland glandular cells|appendix glandular cells|breast glandular cells|breast myoepithelial cells|caudate neuronal cells|cerebral cortex endothelial cells|cerebral cortex neuronal cells|cerebral cortex neuropil|colon glandular cells|colon peripheral nerve/ganglion|duodenum glandular cells|endometrium glandular cells|epididymis glandular cells|esophagus squamous epithelial cells|fallopian t…	As the sensor component of the NLRP1 inflammasome, plays a crucial role in innate immunity and inflammation. In response to pathogens and other damage-associated signals, initiates the formation of the inflammasome polymeric complex, made of NLRP1, CASP1, and possibly PYCARD. Recruitment of proCASP1 to the inflammasome promotes its activation and CASP1-catalyzed IL1B and IL18 maturation and secre…	Belongs to the NLRP family.	Q9C000|E9PE50|I6L9D9|Q9BZZ8|Q9BZZ9|Q9H5Z7|Q9H5Z8|Q9HAV8|Q9UFT4|Q9Y2E0|	NLRP1_HUMAN
Q9NPP4	NLRC4	β-arrestin Interactor	Intracellular receptor	NLR family CARD domain-containing protein 4	-	-	4	2.702e-05	-	Enterocolitis|Familial cold urticaria|Macrophage Activation Syndrome|AUTOINFLAMMATION WITH INFANTILE ENTEROCOLITIS|FAMILIAL COLD AUTOINFLAMMATORY SYNDROME 4|	-	Key component of inflammasomes that indirectly senses specific proteins from pathogenic bacteria and fungi and responds by assembling an inflammasome complex that promotes caspase-1 activation, cytokine production and macrophage pyroptosis (PubMed:15107016). The NLRC4 inflammasome is activated as part of the innate immune response to a range of intracellular bacteria (By similarity).		Q9NPP4|A8K9F8|B2RBQ3|B3KTF0|D6W580|Q96J81|Q96J82|Q96J83|	NLRC4_HUMAN
P19634	SLC9A1	β-arrestin Interactor	Ion channel	Sodium/hydrogen exchanger 1	49	6	21	0.00064367	-	Barrett Esophagus|Hypertrophic Cardiomyopathy|Diabetes Mellitus, Experimental|Dysarthria|Heart failure|Reperfusion Injury|LICHTENSTEIN-KNORR SYNDROME|	adrenal gland glandular cells|appendix glandular cells|breast adipocytes|breast glandular cells|breast myoepithelial cells|bronchus respiratory epithelial cells|cerebral cortex endothelial cells|cerebral cortex neuropil|cervix, uterine squamous epithelial cells|colon endothelial cells|colon glandular cells|colon peripheral nerve/ganglion|duodenum glandular cells|endometrium glandular cells|epidid…	Involved in pH regulation to eliminate acids generated by active metabolism or to counter adverse environmental conditions. Major proton extruding system driven by the inward sodium ion chemical gradient. Plays an important role in signal transduction.	Belongs to the monovalent cation:proton antiporter 1 (CPA1) transporter (TC 2.A.36) family.	P19634|B1ALD6|D3DPL4|Q96EM2|	SL9A1_HUMAN
P54105	CLNS1A	β-arrestin Interactor	Ion channel	Methylosome subunit pICln	50	-	19	8.453e-05	-	melanoma|	adrenal gland glandular cells|appendix glandular cells|bone marrow hematopoietic cells|breast adipocytes|breast glandular cells|breast myoepithelial cells|bronchus respiratory epithelial cells|cerebellum Purkinje cells|cerebellum cells in granular layer|cerebral cortex endothelial cells|cerebral cortex neuropil|cervix, uterine squamous epithelial cells|colon endothelial cells|colon glandular cell…	Involved in both the assembly of spliceosomal snRNPs and the methylation of Sm proteins (PubMed:21081503, PubMed:18984161). Chaperone that regulates the assembly of spliceosomal U1, U2, U4 and U5 small nuclear ribonucleoproteins (snRNPs), the building blocks of the spliceosome. Thereby, plays an important role in the splicing of cellular pre-mRNAs. Most spliceosomal snRNPs contain a common set of…	Belongs to the pICln (TC 1.A.47) family.	P54105|B2RCS9|Q0VDK6|Q9NRD2|Q9NRD3|	ICLN_HUMAN
O00299	CLIC1	β-arrestin Interactor	Ion channel	Chloride intracellular channel protein 1	51	-	7	1.898e-05	-	Keloid|Liver Cirrhosis, Experimental|Degenerative polyarthritis|Squamous cell carcinoma of esophagus|	appendix glandular cells|appendix lymphoid tissue|bronchus respiratory epithelial cells|cervix, uterine glandular cells|colon endothelial cells|colon glandular cells|colon peripheral nerve/ganglion|duodenum glandular cells|endometrium glandular cells|epididymis glandular cells|esophagus squamous epithelial cells|fallopian tube glandular cells|gallbladder glandular cells|heart muscle myocytes|kidn…	Can insert into membranes and form chloride ion channels. Channel activity depends on the pH. Membrane insertion seems to be redox-regulated and may occur only under oxydizing conditions. Involved in regulation of the cell cycle.	Belongs to the chloride channel CLIC family.	O00299|Q15089|Q502X1|	CLIC1_HUMAN
Q9HBA0	TRPV4	β-arrestin Interactor	Ion channel	Transient receptor potential cation channel subfamily V member 4	46	-	7	1.088e-05	-	Charcot-Marie-Tooth Disease|Chronic Obstructive Airway Disease|Spinal Muscular Atrophy|Degenerative polyarthritis|Spondylometaphyseal dysplasia, Kozlowski type|Metatropic dwarfism|Brachyolmia Type 3|Scapuloperoneal Form of Spinal Muscular Atrophy|SPINAL MUSCULAR ATROPHY, DISTAL, CONGENITAL NONPROGRESSIVE (disorder)|Digital Arthropathy-Brachydactyly, Familial|HEREDITARY MOTOR AND SENSORY NEUROPATH…	adrenal gland glandular cells|appendix lymphoid tissue|breast glandular cells|bronchus respiratory epithelial cells|caudate glial cells|cerebellum Purkinje cells|cerebellum cells in granular layer|cerebral cortex glial cells|cerebral cortex neuronal cells|cerebral cortex neuropil|colon endothelial cells|duodenum glandular cells|endometrium cells in endometrial stroma|endometrium glandular cells|h…	Non-selective calcium permeant cation channel involved in osmotic sensitivity and mechanosensitivity. Activation by exposure to hypotonicity within the physiological range exhibits an outward rectification (PubMed:18826956, PubMed:18695040). Also activated by heat, low pH, citrate and phorbol esters (PubMed:16293632, PubMed:18826956, PubMed:18695040, PubMed:25256292, PubMed:20037586, PubMed:21964…	Belongs to the transient receptor (TC 1.A.4) family. TrpV subfamily. TRPV4 sub-subfamily.	Q9HBA0|B7ZKQ6|Q17R79|Q2Y122|Q2Y123|Q2Y124|Q86YZ6|Q8NDY7|Q8NG64|Q96Q92|Q96RS7|Q9HBC0|	TRPV4_HUMAN
Q9Y597	KCTD3	β-arrestin Interactor	Ion channel	BTB/POZ domain-containing protein KCTD3	42	-	5	1.616e-05	-	-	adrenal gland glandular cells|appendix glandular cells|breast glandular cells|breast myoepithelial cells|bronchus respiratory epithelial cells|caudate neuronal cells|cerebellum Purkinje cells|cerebellum cells in molecular layer|cerebral cortex glial cells|cerebral cortex neuronal cells|colon glandular cells|duodenum glandular cells|endometrium glandular cells|epididymis glandular cells|fallopian …	Accessory subunit of potassium/sodium hyperpolarization- activated cyclic nucleotide-gated channel 3 (HCN3) upregulating its cell-surface expression and current density without affecting its voltage dependence and kinetics.	Belongs to the KCTD3 family.	Q9Y597|A0AV15|D3DTA6|Q49AG7|Q504Q9|Q6PJN6|Q8ND58|Q8NDJ0|Q8WX16|	KCTD3_HUMAN
Q14722	KCNAB1	β-arrestin Interactor	Ion channel	Voltage-gated potassium channel subunit beta-1	35	-	2	0	-	-	adrenal gland glandular cells|appendix glandular cells|breast glandular cells|breast myoepithelial cells|bronchus respiratory epithelial cells|cerebellum Purkinje cells|cerebral cortex neuropil|cervix, uterine glandular cells|duodenum glandular cells|endometrium glandular cells|epididymis glandular cells|fallopian tube glandular cells|gallbladder glandular cells|kidney cells in glomeruli|kidney c…	Cytoplasmic potassium channel subunit that modulates the characteristics of the channel-forming alpha-subunits (PubMed:7499366, PubMed:7603988, PubMed:17156368,PubMed:17540341, PubMed:19713757). Modulates action potentials via its effect on the pore-forming alpha subunits (By similarity). Promotes expression of the pore-forming alpha subunits at the cell membrane, and thereby increases channel ac…	Belongs to the shaker potassium channel beta subunit family.	Q14722|A8K9H8|A8KAD4|B3KPZ4|Q13031|Q13302|Q16547|Q6PI60|Q99869|	KCAB1_HUMAN
Q14940	SLC9A5	β-arrestin Interactor	Ion channel	Sodium/hydrogen exchanger 5	-	-	2	0	-	-	-	Involved in pH regulation to eliminate acids generated by active metabolism or to counter adverse environmental conditions. Major proton extruding system driven by the inward sodium ion chemical gradient. Plays an important role in signal transduction (By similarity).	Belongs to the monovalent cation:proton antiporter 1 (CPA1) transporter (TC 2.A.36) family.	Q14940|A5PKY7|Q9Y626|	SL9A5_HUMAN
Q16281	CNGA3	β-arrestin Interactor	Ion channel	Cyclic nucleotide-gated cation channel alpha-3	5	-	2	8.776e-05	-	Exotropia|Hemeralopia|Hyperopia|Night Blindness|Nystagmus|Retinitis Pigmentosa|Low Vision|Achromatopsia|Blindness, Legal|Pendular Nystagmus|Achromatopsia 1|Dyschromatopsia|Achromatopsia 2|Nystagmus, continuous pendular|	adrenal gland glandular cells|cerebral cortex neuropil|hypothalamus neuronal cells|hypothalamus neuronal projections|smooth muscle smooth muscle cells|	Visual signal transduction is mediated by a G-protein coupled cascade using cGMP as second messenger. This protein can be activated by cyclic GMP which leads to an opening of the cation channel and thereby causing a depolarization of cone photoreceptors. Induced a flickering channel gating, weakened the outward rectification in the presence of extracellular calcium, increased sensitivity for L-ci…	Belongs to the cyclic nucleotide-gated cation channel (TC 1.A.1.5) family. CNGA3 subfamily.	Q16281|E9PF93|Q4VAP7|Q53RD2|Q6ZNA7|Q9UP64|	CNGA3_HUMAN
[truncated: 324 more rows]

## Sheet: Protein interactions
Table S2: Protein interactions and the dataset(s) they originate from. Type denotes the category of the interacting proteins (R-GPCR, G-Gα subunit, Α-β arrestin, O-other). Number of cell types where the interaction may take place, i.e. where both proteins are expressed.
Interactor A	Type	Interactor B	Human-gpDB	Arrestinome	GPCR-HetNet	IntAct	IID	Number of Sources	Number of Cell Types
P04899	GO	P68366	1	0	0	1	1	3	66
P08754	GO	Q13509	1	0	0	1	1	3	17
P08754	GO	Q71U36	1	0	0	1	1	3	42
P63092	GO	Q08462	1	0	0	1	1	3	29
P63096	GO	Q13509	1	0	0	1	1	3	17
P63096	GO	Q71U36	1	0	0	1	1	3	42
Q03113	GO	Q92888	1	0	0	1	1	3	29
Q14344	GO	Q92888	1	0	0	1	1	3	34
P21730	RG	P04899	1	0	0	1	1	3	23
P25116	RG	Q14344	1	0	0	1	1	3	13
P30556	RG	P50148	1	0	0	1	1	3	1
P32302	RG	P04899	1	0	0	1	1	3	35
P32302	RG	P09471	1	0	0	1	1	3	6
P48039	RG	P04899	1	0	0	1	1	3	-
P48039	RG	P08754	1	0	0	1	1	3	-
[truncated: 10,023 more rows]

## Sheet: Cell type information
Table S3: Information about cell types and cell-type-specific networks. The Sum of proteins differs from Nodes, since the latter only includes proteins expressed that interact with at least one other protein expressed in the same cell type.
[truncated: 101 more rows]

[truncated: 1 more sheets: Cell-type-specific networks]
